# Supplementary material
Source: publisher site journal article supplement (https://www.spandidos-publications.com/6519/downloadSupplementary)
Supplement: Supplementary file 1 [file downloadSupplementary]

## Sheet: WGCNA Modules
black	brown	green	magenta	pink	turquoise	yellow
TAF15	RNF165	GLT8D2	CIDEA	RPS24	SLC9A1	ST6GALNAC4
ARPC5	HIPK2	ANTXR2	CLDN3	MASTL	PML	IL21R
SEPTIN11	SPN	SLC7A1	ACKR1	CDCA5	RPL35	RASSF4
CCZ1B	PDXDC2P	ANTXR1	MIR99AHG	AUNIP	TM2D1	DOCK2
NUCB2	MRPL36	INHBB	FABP4	NTN1	PDIA6	CD52
HSP90AB3P	RNF13	BOLA2B	IL33	MELK	BTBD3	BRF2
RPL36	AKAP5	NDN	CCL15	RPP40	CISD1	DNAJB1
TPT1	DFFA	COL8A2	SLCO2A1	PHGDH	PSME4	PLOD1
KDSR	ARHGAP33	GAS6	ABCA3	DLGAP5	FHOD1	TCL1A
ANXA3	LXN	CEMIP	AQP1	SLC7A5	EEF1E1	ETV4
NEBL	SUGP2	FILIP1L	TSPAN7	KRTCAP3	TMEM237	WAS
RPL23	TDG	MMP10	NOCT	UCK2	PM20D2	REC8
SEPTIN7	RBM33	TMEM204	ID1	ECE2	FOCAD	TCIRG1
PTMA	UBA1	GRP	SLC40A1	CENPW	GCSH	ARHGAP9
SUMO2	MBD4	CTSB	CIDEC	PRKDC	DENND1A	FAM183A
CLK1	TMEM267	PMEPA1	LZTS3	CKS2	ZNF217	RAC2
LGALS8	RPRD1A	EVA1A	PPARG	MSH6	LYPLA1	SYK
FAM133B	SOGA1	ABCC3	EGR1	C1orf112	MOBKL3	STAT2
RNASEH2B	POFUT1	GAS1	CALCRL	CENPV	TCEA1	PSME1
RPS28	AGO2	LINC02381	COL17A1	B4GALT3	ITGB1	IRF8
MRPL48	ITPK1-AS1	AMPH	LHFPL6	KIF20A	ESRP1	TRANK1
FAM210B	CMIP	TOR3A	SPARCL1	NDC80	DGLUCY	SHISA5
RTN4	ZNF483	ACKR3	CAV1	IL17RB	EIF4H	SH2D3C
ZFP36L1	NRBF2	AHNAK	EBF1	CST6	CSNK2A1	DNASE1L3
RPS26	SLC36A4	BGN	BEX4	PSRC1	PPFIA1	CTXN1
RPL5	NDUFAF4	SMYD3	LAD1	GTPBP4	MANSC1	GRTP1
FP15737	H2BC8	NOXO1	CBS	KIF11	SEC11C	IDO1
FABP5P3	RBM14	GSDME	CFD	USP1	HSPH1	BAMBI
RPL19	SPTLC1	PRRX1	MAMDC2	TOMM34	FAM83D	NOL3
TXNL1	IFNAR2	FLNC	TBC1D9	BIRC5	UGP2	IGLL3P
EIF3M	CARM1	SMAD6	ARL4A	TGIF2	PKM	CD53
CDKN1B	MIGA1	PLIN3	TLCD1	KIF4A	FOXRED2	LAT
UQCRHL	MRPL20	MMP13	GEM	CENPM	RGCC	RASAL3
PRADC1	KDELR3	CSTF3	CILP	NCAPG	RPL7A	P2RY13
MTRNR2L1	KCNS3	CLIP3	LAMA2	TYMSOS	PPM1F	HLA-DMA
ALDH1B1	LRP5L	C14orf132	CTSG	MCM7	CIDECP1	RNF125
EXOSC3	DUSP22	CPXM1	GNG11	NUDT5	ANKRD37	LAX1
PIAS4	TPM1	HTRA1	CDK18	KIF2C	PAIP2	DKFZp686O16217
CPNE8	C1orf122	TCEAL3	FAM110D	CDC20	NIPSNAP2	CCR2
HNRNPC	SLC25A37	SERPINE1	F2RL2	NUSAP1	RNPS1	GSDMD
RPS11	SLC16A12	TIMP2	LDLRAD3	SMIM1	KLF6	FYN
LAMB1	WWC1	CCDC3	CX3CR1	PTTG1	INSIG1	APOBEC3F
MZT1	LOC401261	ADGRG6	ACACB	NAXE	COASY	TNFRSF13B
SUB1	B4GALNT4	SSC5D	CPA3	CHD7	B3GNT2	DHRS9
MCTS1	CTIF	STEAP2	PFKP	ZNF670	SRSF6	IFNG
PGRMC2	PPA2	TWSG1	MMP23B	SKP2	SMG1P2	TNFRSF4
SLC38A2	AGAP6	ISLR	GJA4	ARL5B	ACADM	PLCL2
AMY1A	THOP1	NREP	PRSS12	EXO1	SCMH1	ICAM2
BOLA2	ZNF786	SRPX2	FAM241B	KIAA1211L	NPTN	MSN
FH	ZNF669	BMP4	HSPB6	NME1	GNG10	APOE
HNRNPUL1	SLC4A5	SLIT3	JADE3	FAM189B	MAD2L1BP	IKZF1
DDX17	LINC01720	TTC39C	KIAA1324L	BUB1	PLIN2	CD79B
PTGES3	LEP	MSX1	HYAL3	PRC1	CA2	JADE2
METTL7A	PCYOX1	C1QTNF6	ILDR1	CDCA7	RPS17	TSPAN32
PAPSS1	HAUS2	TGFB3	LEPR	RCOR2	CBWD5	MZB1
NFIC	NPIP	RGS16	ABCA8	RACGAP1	RPL18A	ARHGEF6
IFI27L2	EEF1AKMT3	POSTN	RASD1	TTF2	TFDP1	HCP5
FTH1	AMT	CDC42EP4	METTL27	PRPF3	TUBB6	PSME2
SMARCA5	RALB	HEYL	PLIN4	CDC45	MC1R	ADAP1
SNORD68	ARL16	GAS7	ZFP36	RPF2	NDUFB3	ALDH2
AK2	MZF1	EML1	OGN	KLRG2	PXMP2	ENPP2
EIF3A	PYROXD2	AFG3L2	ADM2	BLM	DQ895289	CXADR
UBA6	PHKA2	CDH2	MFAP4	CDC25A	COX7A2	TNFSF10
MFF	LOC100505715	WFDC1	NR2C2AP	UBE2T	NDUFS4	IL15
FAM98A	TNFRSF9	TP53I3	ECRG4	PKMYT1	CLDND2	DCAF4
RBBP7	SULT1A1	HSPA12A	APLNR	DDIAS	THOC3	CAMK1G
NOP58	SF3B3	MXRA8	PDK4	CENPA	C11orf1	C1orf53
FZD6	CREG1	MYO1D	CD36	CDT1	SMARCC1	BTG2
RAD21	METTL21A	LRRC32	CLEC14A	CCNA2	RPS5	SAMD3
COX7B	TLCD5	JAM3	FCER1A	ISG20L2	SNX5	BCL11B
KLF13	AHSA2P	CTSK	ADH1A	FANCD2	SDCBP	CR2
SLC39A8	TRIM13	NTM	CLDN11	KIF14	APP	TAPBPL
IFRD1	CHD8	HOXB5	GJB3	RRM1	PLCH2	LTA
YES1	TNFSF14	TNC	ANGPT2	C19orf48	SMIM26	HLA-E
A2M	GABPB2	SORBS1	CXCL14	CDCA2	SESTD1	HLA-DPB1
TSC22D2	DLC1	TRO	KCNN4	PDSS1	ARL6IP6	CLDN12
MBNL2	ZMYND11	DACT1	AOX1	APOBEC3B	GYG1	SPR
RTN3	TSPO	PRICKLE2	ADGRF5	HJURP	FBXO7	DVL3
VHL	LINC01094	MTPAP	GPRIN2	KNTC1	HACD1	CD3G
CHMP4C	CSNK1E	NUAK1	ESAM	FEN1	LRP3	CXCL13
SH3YL1	NPIPL2	IRS1	PLIN1	TMEM97	SNRPA1	ITM2C
PPCS	TRAPPC4	RGS4	WIPF3	PBK	ANXA2	PROSER2
TRMT10C	ENO3	FMOD	TMEM119	HEATR1	TTYH3	STC2
SACM1L	GPR137B	NFKB2	PGBD5	STMN1	OPN3	APOBEC3G
FAM49B	DKFZp434K1323	PCSK5	CBLC	CCDC58	RAP2A	GIMAP8
RPS3A	DOCK4	PDE5A	CD300LG	CMSS1	FRG1	NDRG1
SUMF2	RBFOX2	ITGA11	MESP1	MXD4	HIKESHI	IRX5
RPLP1	EXOSC1	NKX3-2	CD34	VASH2	MARCHF6	MEOX1
TARS1	FAM3C	TSPAN18	A2ML1	MND1	RNFT1	PARM1
MAP1B	PCDHB19P	WNT5A	GNG4	TTLL4	TLR5	PPP1R13L
PMAIP1	CREB1	HEPH	PANX2	H4C3	VIM	TXNIP
POLR2J3	CCDC167	CLEC11A	ABHD17C	CENPN	AGPAT5	CD27
MTF2	GLB1	TYSND1	OAF	PUS7	ERP29	TNFRSF17
PYGL	KLHL5	SYNDIG1	JMJD4	IL37	SBDS	AIM2
REPIN1	ATG12	C4orf3	ETS2	TOP2A	RBM4	GZMK
PABPC1	HNRNPU	NPB	CLEC3B	FBXO5	NPM1	RFTN1
ST6GALNAC5	CSTB	ELL3	FOS	HMMR	MAD2L1	EPHB4
MAK16	ANKRD20A11P	STMN2	SELENOP	POLQ	PRTFDC1	HCLS1
MINDY3	RGS10	METRNL	PGM5	PPAT	ATP5F1A	BAG3
TIA1	ELAVL1	SNAPC3	PLPP1	TAGLN2	MGP	CCL21
AMY2A	ILF3	TIMP3	CXCL12	KIF23	VDAC2	TOX2
C7orf28B	LGALS1	FMO1	SLIT2	COCH	PSMD6	SH3RF1
GOLGB1	COX19	MAFB	F2R	H2AX	RPL37A	CEBPA
ZNF146	LOC728153	RCN3	MOCOS	RIPPLY3	DONSON	PTPRCAP
SAR1A	BCCIP	COLEC12	ENG	MANBA	TCTN3	BTN3A3
DDAH1	ZNF430	COL3A1	FHL1	UBE2C	ATP5PB	RUNX3
IFT74	NUCKS1	TNFAIP6	CDO1	NASP	NDFIP2	CASP17P
FYTTD1	PRKX	PRSS23	RGS5	PARP1	PLPBP	SEL1L3
DSTN	PNPLA3	DIO2	CDH5	FLAD1	SNHG5	RAB37
RTRAF	KDELR2	IGFBP5	PTEN	PRAME	CDK1	ELF3
MMP1	FOXP1-IT1	TARBP1	LDB2	HLTF	RPL8	GBP5
SSPN	LOC729603	CCN4	LYVE1	RMI2	HM13	KIAA1522
EDF1	PILRB	MATN3	TFPI	E2F7	PEX2	ARHGDIB
RPN2	LACTB	CD320	PLA2G2A	HROB	HAUS7	DEF6
ANXA2P1	WASH3P	PLAAT1	LIMA1	CCNB1	TMEM175	HCST
ME1	C11orf74	COMP	TSHZ2	PDCD2L	NAT10	CD3D
RHOB	ACSL3	FSTL3	LRRC8B	UBE2S	GAA	TGM2
HAT1	SEMA3E	TBX2	SCG2	NEK2	ITPRIPL2	JAML
SPIN4	NUBPL	MMP11	COL15A1	CHAF1B	ACER3	ITM2A
TSPAN13	FBXL19-AS1	SUGCT	CLDN5	TROAP	HNRNPA1L2	ARHGAP15
ZBTB8OS	LOC440157	COL6A3	OPRPN	CENPF	DNAJB6	XIST
UAP1	H3C10	HOXB7	GPX3	LRP8	MED30	FAM43A
OFD1	PPFIA4	KCNMB1	TGFBR2	CDCA8	RRBP1	RHBDF1
NACA4P	ULK1	CD248	SLC38A3	UNG	RPL26	DOCK10
EFHC2	MSL3	LUM	SPIRE1	PSAT1	SF3A3	GVINP1
MRPS21	JHY	COL8A1	NRP1	SKA1	LAGE3	TINF2
LARP4	LRRC2	TCF4	ANKRD36	CDC7	PDCD5	RAB8B
MTDH	MBD6	MFAP5	TPSAB1	TSPAN5	TMED10P1	SUSD3
PEBP1	CHTF18	SULF1	NFE2L3	MRPL12	RPS27	CTDSPL
F11R	SAMD4B	TMEM47	VWF	BARD1	DLD	CH25H
RPS7	MAPK9	THBS2	RHPN2	EPRS1	MKNK2	CD3E
EIF1AX	CEP19	MTAP	PRND	KIFC1	SPCS1	PTGDS
RPL37	CDK10	SMOC2	SOX18	CSE1L	ZNF827	DPEP2
RAMAC	EIF5A	LRRC15	CD93	PKP1	IAH1	APBB1IP
HEBP2	TNK2	CPQ	G0S2	CCNB2	RCC2	GZMB
H3F3A	LMOD3	SFRP4	ZNF165	KIF15	SGSH	RAPGEFL1
PERP	GRN	BHLHE40	THBS4	AURKA	LDHB	GBP2
ST13P4	PDPR	ITGB5	DNALI1	CNKSR3	WWC3	LINC00857
SUMO1P3	SGSM2	FSTL1	MSRA	PHF19	YME1L1	STAT5A
NMI	PPFIBP1	GREM1	EGFLAM	MCM6	TMCO3	P2RY10
AZIN1	NPIPB9	CDH11	PLAC9	TRIP13	RPS6	CTSH
DEF8	RPE	TBC1D2	MYH11	FANCE	ATAD2	GBP4
ATP1B3	TBC1D15	CES1	MAN1C1	GMPS	PSMC1	HLA-H
P4HA1	FKTN	C11orf96	ADCY4	SAAL1	POP4	APOL3
SLBP	CRADD	GTPBP3	PRG4	CLIC3	ARF4	PLA2G4C
AFDN	BRK1	EXOSC5	TSPOAP1	PIMREG	FBXO32	SLA
RPLP2	TDP1	CYB5R2	SLC7A10	TTK	MRPS18C	BRSK1
PSTPIP2	GUSBP9	PGAM5	GCNT2	KIF20B	RPL13AP6	MARVELD3
RPL32	SNAPC4	NNMT	SPRY1	DARS2	N4BP2L2	TMEM156
DAAM1	C21orf58	PCDH17	DHDH	SMC4	PIGF	MFNG
PKN2	XPNPEP3	PPIC	DUSP1	PTTG3P	ACAA2	PSMB10
UFM1	STAT3	ZNF469	EFEMP1	MCM4	DHRS1	SERPING1
GET1	DYRK2	COL12A1	PI16	CENPE	CLSTN1	CD48
RANBP1	CD46	SFRP2	PLPP3	HDGF	TMCO1	ICOS
OSTC	RAX2	FAM117B	PTGIS	GSTM2	RPLP0	HLA-G
MYO10	SLC50A1	KCTD15	FOSB	ASPM	EMC6	DPT
SEPTIN4	VPS24	HDAC1	PAMR1	STIL	PUM3	TNFAIP2
KTN1	RAB32	RBM38	MTFP1	POGK	HSD3B7	CMTM4
TUBA4A	PIM3	OLFML3	HMGA1	CABYR	PCNT	IL18BP
RPL15	CASTOR3	NTN4	EPAS1	BAIAP2L2	WTAP	IRF5
NARS1	RPPH1	SHISAL1	TIMP1	TPX2	UBA3	LPAR5
DUSP6	GOLPH3	FEZ1		ARL9	RBIS	ERAP2
NXT2	ATP6V0E1	CEMIP2		CTPS1	CNPY2	LPXN
CDC42	hINADL	MEG3		POLR2F	APOL2	PNOC
SMARCA2	NOTCH3	SPON1		CKAP2L	AIDA	TYMP
EIF3F	EID2B	CDC42EP5		HPRT1	HNRNPA0	FCRH3
FAM162A	JMJD7-PLA2G4B	TPM2		LIN9	ID2	GZMH
PSIP1	TIGAR	COL6A2		ANLN	ALYREF	PSORS1C1
MTRR	MCM8	ANO9		CBX2	PNPLA6	NKG7
RBM34	GSN	RPIA		HSPA14	HENMT1	IKBKE
CCT6P1	ABCC4	PDPN		AURKB	MRPL45P2	SLCO3A1
LGALS3	NFKBIZ	ECM1		MCM2	CHD9	TSPAN6
FAM102B	INPPL1	GASK1B		ECT2	JAK1	KLHL6
TTC32	PBX3	HOXB2		DHRS11	TUBA1B	HLA-DOA
G3BP1	USP14	RAB3IL1		DKC1	CCNC	CMTM8
PSMA3	THOC2	SH3PXD2A		NDUFS5	COMMD8	ATF7IP2
RAB15	PDCD4	COL11A1		ZNF232	HNRNPK	CCL22
MYO1B	SPDYE7P	PHLDA3		TMPRSS3	SELENON	GPAA1
CCT8	ALPP	GALNT10		OIP5	RFC3	PLCG2
CCT6A	CATSPER2	PLAT		CCDC34	SLC6A8	ZC3H12A
RAB33B	NRIP3	FGD5		SRPK1	SAP30	PLAC8
UQCRBP1	ZNF69	PALLD		GSTM3	HNRNPAB	STAT1
LUC7L3	PRMT2	ZNF503		USP13	FBXW7	VEGFA
HMGB2	DENND4C	LMCD1		MCM5	C10orf32-AS3MT	RFX5
RHOQ	ZNF91	MGLL		CEP55	CD151	PLAAT4
RPL36A	RN7SK	LSM4		CIRBP	LSM5	LAG3
ABRACL	FAM111A	HOPX		LMNB2	TPI1	CYTIP
SDHAF3	MAP6D1	CMTM3		MCM10	NRSN2	JCHAIN
ATP11C	CLUHP3	DAB2		UBAP2L	FKBP1A	VNN2
RPL13	ITGAV	EDNRA			AP3S1	POU2AF1
HK2	SLX4IP	CCN1			LAMTOR5	CD69
WSB1	D2HGDH	LOX			DNAJA1	ELMO1
PRCP	PP7080	STK26			CSRP2	RASGRP1
PPIA	IL11RA	MXRA7			GCLM	IRF6
NEDD9	MINDY1	SLC22A17			EIF4A1	CD38
GDI2	DNAJB9	NFASC			VEZT	LBH
CYP51A1	FRG1BP	PDGFB			RPL17	AKNA
RPS4X	ZNF266	HSD17B6			ADORA2B	UBA7
RPL23AP64	PPIE	POLR1E			B4GALT5	KIR2DL4
FAM89A	NPIPL3	COL1A2			MGAT2	VCAM1
HMGB1	LYPLAL1	DLL1			ATG4B	RINL
PHIP	CSF2RA	ZFHX3			ATP13A1	IGSF3
BUB3	FLJ23865	CAMK2N1			NNT	TUBB2A
ALG5	SLC35E1	LAMC1			PGM1	PLEKHA2
ETS1	PTPLAD2	PCOLCE			OSGIN2	LAT2
SS18	ANO8	CCN5			TUBB4B	SDF2L1
HSPA1A	AGL	PRRX2			ACAT1	RAMP3
CNIH4	DTWD2	CRISPLD2			NGDN	TCRVB
CMPK1	RAB9A	ZNF365			KCTD13	KIAA1671
RPL9	H4C8	SNORD123			GOLT1B	BTN3A1
FTH1P3	WBSCR20C	SLC25A22			TMEM41A	INPP5D
FKBP3	PGRMC1	ARHGAP23			GPR89B	SP140
TNFRSF12A	AK128346	SERBP1			PRIM1	KIR2DL3
NAE1	HOOK1	PTPRD			EIF3H	MICB
WSB2	FDPSL2A	FANCG			RPSAP52	GIMAP7
CAST	NSMF	CDKN1A			BRD9	CD8A
SYAP1	SAP25	BC007360			PLEKHF2	IL2RB
ZNF521	IDH1	WLS			ASAP3	RGL1
KLHL24	SYNJ2BP	APCDD1			LHPP	NIBAN2
GNA13	PDXDC1	LAMP5			CCDC9B	NCF1C
LOC728758	SLC25A25-AS1	MSRB3			RPL31	LDHA
ATP11B	LITAF	CD99			LAMTOR2	DDIT4
INTS8	BLOC1S6	DPYSL3			MRPL33	LYL1
ERGIC2	MAGT1	LRRC17			INTS1	NAPSB
YY1	FAM161A	MXRA5			RNF145	PRKCH
PPP2CB	SND1-IT1	COL5A2			PIGY	ATP2A3
RPL13P5	ZNF394	FAM184A			YBX3	MVP
MEX3C	TCEAL1	TWIST1			TXNRD1	TNFAIP3
IER3IP1	TNPO3	PALM			LOC284757	PIK3CD
ACTR3	POM121L8P	NOL4			IFT27	MYO1G
UQCRH	TNFSF15	PDLIM7			CASP6	GMFG
CR613620	INPP5E	VXN			IMPA2	SOX4
GLRX2	CCBE1	RRAS			WDR12	AHNAK2
PRPS2	KLF9	OMD			TAGLN	DPCD
LOC441869	LRRFIP1	HOXC8			PKN1	GZMA
CKAP2	SNAPC1	OLFML2A			DPM1	TRAF3IP3
PRKAR1A	AP3M2	AXL			CYBRD1	RIPOR2
LCOR	HSD17B7	COL10A1			NFE2L2	HLA-DOB
CUL4A	HSD17B12	IGFL2			FLOT2	CCND2
NCSTN	GATD1	TPST1			PSMG1	DOCK8
YIPF4	ZNF682	ADAMTSL2			RHEB	PCDHB17P
CNBP	DIPK1B	FBLN1			TUSC1	PTPN7
RBM47	TCF20	FERMT2			GTF2A2	DSP
TRAF3IP2	ZNF549	CAVIN1			SLC3A2	DDR1
HIGD1A	DAPP1	PDGFC			TBL1X	CELSR2
APH1A	KIAA1549	CNN1			CCNDBP1	SERPINF2
RPS18	MST1	FAM20C			SRGAP1	EFNA1
ECHDC1	CAPN12	FBL			FBH1	NR1H3
GNA11	VPS41	SRPX			MICAL1	FCRLA
	STAG3L2	COL5A1			TRAF2	FAM30A
	TIAF1	ROR2			PGM3	MBP
	TMEM14A	HOXC6			SNRPN	LOC728392
	MTUS1	SLC5A6			S100A10	CD37
	ADCY3	SALL4			ZNF467	FBXO6
	CCDC130	SPARC			RPS2	APOC1
	WDR74	PRSS3			GGH	SPOCK2
	PLCXD1	ACTN1			RBCK1	SP110
	ARHGEF4	C1orf151			LMBRD1	ARHGAP25
	GPR1	FAP			ABCA7	FBXL2
	EXO5	PHLDB1			TRIB2	KLF2
	H2AC8	GJB2			PTGR1	IFI16
	TOP3A	SCG5			ARPC4	EIF4EBP1
	LAMP2	CYP26A1			CCT6P3	CXCR5
	DCAKD	GPR68			ACTR10	IL7R
	NUMA1	COL18A1			RPL6	SMAP2
	KAT6A	RARRES2			CAV2	TAP2
	PLEKHA1	KLK4			ASF1B	CDR2L
	TBC1D32	MYL9			DYRK1A	CD79A
	DHRS7	H19			ALDOA	ITGB7
	DDX47	RPS6KA2			DOCK7	BANK1
	EMP1	PLAU			BNIP3L	NUPR1
	TNFRSF25	COL16A1			EZR	MAL
	TMEM91	COX7A1			TSNAX	NDUFA4L2
	KITLG	DKK3			TAPBP	CYBA
	IL10	PPEF1			PRDX4	GPR18
	LAMA5	CPE			RPSA	FES
	TIMM23	SCARF2			RPL34	ANKRD22
	IL17RD	KCTD10			HSPA8	LRRFIP2
	PHYH	JPH1			RPL7	ALDH7A1
	SMA4	CNN2			EIF4E	RHOD
	ATAD3A	ISM1			DPAGT1	ITGAL
	RIPK2	DCN			ESD	PCED1B
	FKBP14	KRT10			PGAM1	CD2
	NPIPB13	BMP1			APOO	SKAP1
	RPL32P3	MME			RPS21	LRRC1
	XRCC2	CCN2			KIF5B	AGAP1
	SHPK	FKBP9P1			H2AZ1	SOX9
	IFT122	FZD2			PRNP	KCTD3
	RND3	GPX8			RPS12	FAT1
	CRIPAK	CORIN			PLS3	TARP
	SAC3D1	THBS1			NUDT2	GM2A
	MAP3K1	TSHZ3			MYH14	LAMC2
	ARMCX1	HS3ST2			ACTR3B	CXCR3
	SLC44A3	CPXM2			TCP1	TRPV2
	REXO2	NOX4			TATDN1	ARHGAP30
	GCA	VCAN			DDX21	IL10RA
	SMPDL3A	COL4A1			UCHL5	ITGAX
	FCAR	PLCH1			RTL6	CD300LF
	ZNF493	PDGFRB			CMTM1	CXCL11
	AFF4	NT5E			TIPRL	PRKCQ-AS1
	surfactant associated protein J	PCDH18			KLF4	FNBP1L
	TMEM241	SUSD4			SEMA4A	POP5
	TMEM243	FST			XRCC5	MLKL
	EIF3B	RAB23			VCL	CD96
	TACC3	MORN3			TMEM14B	LEF1
	DDX51	RTL8C			ENY2	SLC2A1
	BC132896	ADGRA2			BCAP29	MAP4K1
	FAAP100	EFEMP2			ADAM9	ANGPTL4
	EVI5	FDCSP			FAM92A	BTN3A2
	TCAF1	ZCCHC24			WEE1	FER1L4
	MBOAT2	ELN			NET1	VPREB3
	FLJ39632	SVEP1			ZNF296	PRF1
	ZDHHC8	NMNAT3			NAMPT	TMEM140
	MCMDC2	CCDC28B			INF2	SASH3
	MLLT6	COQ8A			NFAT5	IGLL1
	GNPNAT1	SERPINF1			APEX1	UNC93B1
	KIAA0562	PDLIM3			SQLE	ZAP70
	HTATIP2	ITGA5			GABARAPL2	PLEK
	TMEM17	SNAI2			RPS13	CST7
	SHCBP1	NCRNA00152			CNIH1	WARS1
	CDC25B	DDR2			C12orf57	KLRG1
	FAM153C	CORO7			ATP5PF	SEMA4D
	HCG2P7	SPOCK1			RRP7A	GIMAP4
	ETFA	ANO1			PDCD6	TMEM54
	IL18	PODN			POLR2B	SH3BP4
	TRIB1	ACTA2			AX746718	C7orf13
	OCIAD1	THY1			TPGS2	HLA-DMB
	KAT2A	MN1			CCNG1	C7
	MRPS16	UBA52			SYPL1	CD83
	PCBD1	FBLN2			NUDT21	TBC1D10C
	MPST	GLIS3			MAL2	UBE2J1
	DDX39A	PPP1R3C			UBE2G1	BIRC3
	LTO1	AEBP1			H3-5	PRKCB
	HIST2H4B	NACAD			MGST1	BIN1
	PDE7A	RAB31			SLC25A33	HLA-F
	AHR	RIN2			TUSC3	VGLL4
	UBE2G2	ANOS1			AAMDC	FLNB
	ACOT1	CDKN2A			PGGHG	ST3GAL5
	SPPL2A	STOML2			CACYBP	YEATS2
	SUZ12	RPUSD3			PODXL2	MPDZ
	H2BC12	SYTL2			YAP1	FNBP1
	MGC24103	PRMT3			CBX6	FCMR
	EIF2AK4	COL4A2			PSMA1	GRAP
	NOTCH1	EMILIN1			YEATS4	FGD3
	MAP3K6	MARCKSL1			LOC349114	LTB
	INIP	TPPP3			SDSL	PAPLN
	ACSS1	ECM2			BOLA3	CCNY
	MED15P9	HOXC4			SDHD	GNLY
	DUSP19	FNDC1			HSP90AA1	GIMAP5
	ADAM17	GJA1			CEP131	RASSF2
	DENR	LINC01116			CASC4	CORO1A
	SHROOM4	ACVR1			IGFBP7	CCR7
	DIAPH2	PDGFRA			PPP1R13B	CELF2
	MAPK8IP3	COL1A1			LOC146880	PIK3IP1
	KIAA1791	LEPROT			CCZ1	TP53INP1
	NBPF9	TENM3			ESM1	MCOLN2
	SETBP1	RARA			ASH2L	PPP1R16B
	AKAP8L	CYGB			FAM72A	CD1E
	NGRN	OLFML2B			DCUN1D5	ADGRG1
	SNCA	ENC1			EEF1A1	ICAM3
	C8orf37	LAMA4			C17orf58	C3
	ZNF557	PDGFRL			TOMM20	CXCL9
	MPHOSPH8	SULF2			NAP1L1	IGFLR1
	SPTBN1	NKD2			TMPRSS13	MATK
	UPF2	VEGFC			FZD1	TPST2
	NCOR2	CHST15			MEST	IRX3
	EBPL	C1QTNF5			RAB11FIP3	ALPL
	NOP56	ZYX			TUBB	BAIAP2L1
	GOLGA2P10	ADARB1			PJA1	TMEM176A
	USP49	TGFB1I1			NBN	SIPA1
	MPC2	THRA			UBQLN4	SLAMF1
	PLA2G2D	IGFBP6			AHCY	RASSF5
	LRRC42	RUNX1			CRNDE	RENBP
	CFAP74	MMP3			GART	MAP7
	RPS27L	FRMD6			RPS27A	CDK12
	DMC1	IGFBP4			SF3B6	FKBP11
	GSTTP2	CERCAM			ZWINT	CSPG4
	C11orf80	IGSF21			NRARP	SPINT1
	GOLGA8B	CAVIN3			PSPH	SLC2A8
	WDR90	COL6A1			PLEKHB2	PTPRF
	TJP1	SERPINH1			NCK1	RAC3
	TGOLN2	WDR86			CDCA7L	FYB1
	DCBLD1	LAMB2			VWA1	HOXC13
	ZNF562	TGFBI			TUBA1C	CD276
	N4BP2	ANGPTL2			VPS16	SH2D1A
	TBRG4				VPS37B	SYT11
	C12orf75				UQCRB	TLCD3A
	AIRE				SPP1	IL4R
	AHI1				FAF1	PIP4K2A
	AKR1D1				FAM102A	JSRP1
	ZFAND6				PIGT	DENND2D
	ZSWIM8				CRYZ	SMTN
	FGF11				HSPA1B	GINS2
	ZNF652				SNX7	CA9
	CHMP1A				IQCN	HSH2D
	GNL3L				AMD1	FERMT3
	RBM18				FURIN	RBP5
	ACP7				CYCS	CYFIP2
	SLC29A1				CLIC4	GRHL2
	CDAN1				RPL4	SLC2A6
	HNRNPA2B1				SUCLA2	KLRB1
	BCYRN1				TRIM38	ADA2
	SELENOS				NCKAP1	PIM2
	POLD2				CHMP1B	PARVG
	SPIRE2				PTPN12	BATF
	OCLN				P4HA2	PRDM1
	PNPT1				COPS5	IRF1
	DPY19L4				RPL10A	ARHGEF3
	ZADH2				CAT	SEPTIN6
	STRIP2				SCOC	CSF3R
	TMEM126B				UBE2E1	KHDRBS3
	TMEM74B				DCTN6	IL23A
	PACSIN3				SET	CD247
	BLZF1				METTL5	SERPINB5
	DKFZp667P0924				PPA1	CD7
	RHBDL2				HMGN2	ISG20
	SAPS2				DTWD1	SERTAD4
	FOXO3				ZC3H15	LCP1
	PTGR2				ODC1	C1orf74
	SLC25A4				KATNA1	CLECL1
	PLAUR				TMED10	ENO1
	SASH1				CCDC189	CTLA4
	GLIPR1				EPCAM	PXDN
	PTTG1IP				PLSCR4	PTPN6
	LOC283788				PFKFB3	PVRIG
	ARHGEF19				APBB3	GPSM3
	GSDMB				YBX1	LIME1
	GPSM1				PLXNA3	CD40
	PPM1B				LANCL1	UBD
	PTS				RPA3	abParts
	SPG7				DSG2	SPON2
	CHRNA5				NDUFB2	GAPT
	ACOT2				KLHDC4	CYTH4
	DMD				MMADHC	SHROOM3
	ATP6V0D1				NDUFA4	PYCR1
	PLXNB1				MSMO1	TNFRSF14
	RRAS2				GTF3C6	RSPO3
	GJC1				ENSA	CXCR6
	GRIPAP1				CKS1B	EVL
	NAA20				ELOVL5	RASGRP2
	TAF1C				MRPL13	KRT18
	MCM3AP-AS1				SPCS2P4	SLC20A2
	ZNF573				SLC12A2	RNF126P1
	RPL7L1				DAD1	CD6
	CADM4				EXT1	IFFO1
	STK36				SMAD7	SPIB
	PRRC2A				GLRX3	VAMP1
	HSPB11				KPNA2	FGR
	YRDC				CALD1	CDC42SE2
	ANKRD20A4				TAF2	EAF2
	CRCP				PRKCD	BNIP3
	NTAN1				SNAP23	HLA-DQB2
	DPH3				CHPF	TCRA
	MORF4L2				SEC24D	TENT5C
	MYOF				PSMG2	PYCARD
	ZNF148				LSM3	ADAM19
	POGLUT1				CTNNB1	DGKA
	SLC31A2				COMMD6	SELL
	ZMAT3				SSR2	ADGRE5
	ANKRD36B				NFKBIA	ABI3BP
	H2AC6				LPCAT1	ARRDC2
	SAR1B				TMC6	ACSL5
	ZBTB40				COPS4	PLOD2
	C3orf14				EIF4G2	EVI2B
	CNST				TMED2	IGKC
	SERF2-C15ORF63				TXN	CASP1
	ALG13				SUN1	P2RY8
	ZNF577				RFC2	CCL19
	BRD3				HMGN1	STAMBPL1
	SSTR2				HNRNPA1P10	LRMP
	NLRP8				NSA2	GPC1
	XPOT				BTBD1	ARHGAP4
	GLO1				LAMTOR3	SLAMF6
	GSTO1				DEK	SNORD13
	BRI3BP				PPIAL4A	CD19
	LILRB1				ARMCX6	ADA
	SMARCA4				SMS	ACAP1
	DCLRE1C				TUBA1A	FGD2
	PHAX				SYTL4	GHRL
	GTF2H5				G3BP2	STAT4
	FOXK1				EEF1G	EOMES
	ZNF529				VPS25	TAP1
	CYB5RL				GPR89A	ANXA2R
	PDE4C				CNOT7	PYHIN1
	ICA1L				PIEZO1	CRB3
	GP1BB				LMBR1	PFKFB4
	KCNH6				TMEM123	CETP
	ASAP1				SMAGP	KCTD5
	SLC66A3				HERPUD1	NELL2
	SEC22C				PIPSL	PRR36
	PRELID3B				ITFG1	PPP1R18
	C20orf24				NPEPL1	ITK
	ANG				MAP3K20	TSPAN9
	DRD4				SYF2	SSR4
	MTMR12				MRPL11	ADRB2
	KLHL8				ISOC1	CCL5
	PON2				HNRNPA1	NFS1
	TDRD1				MRPL15	IGKV1ORY-1
	ZMIZ2				UBE2D3	ZNF683
	ZNF223				ATF3
	RNF19A				RPL29
	SKAP2				ATP5F1C
	ACOT9				MRPL51
	USP36				RNF168
	C14orf153				GMNN
	PCDHB9				HSPD1
	FARP1				TXNDC5
	PKD1P1				ADH5
	FAAP20				WDR1
	WASHC1				DENND1B
	SPATS2L				RBBP4
	AOC4P				ANKRD33
	MRGBP				MAP3K13
	MYB				POTEKP
	POLR3A				C16orf91
	CDKN2AIPNL				MPC1
	AP1G2				C1orf43
	CLUH				B2M
	POM121C				ABCD1
	GABBR1				NECTIN2
	TMEM126A				MORF4L1
	ZDHHC14				BTG3
	ZNF14				SFMBT2
					RPL21
					RPL23A
					MTERF3
					ELOC
					IL10RB
					SYT7
					SPATA20
					PNPLA7
					NUP160
					PLD1
					ATP2C1
					LBR
					COBLL1
					NDUFA12
					EHF
					OGDH
					PCLAF
					GABRE
					RMDN1
					NOA1
					RPL36AL
					UQCRC2
					ACTL6A
					MATR3
					HSD11B1L
					CDKN3
					ATAD1
					BEX3
					CDCP1
					TSC22D1
					CHCHD2
					PPP2R3C
					GNL3
					TFB2M
					ACTB
					SGCE
					ACYP2
					DCK
					TOMM5
					EI24
					UBE2E3
					UBE2V2
					NMD3
					VBP1
					PSMD10
					SFT2D1
					CCNG2
					SRP9
					ST13
					IARS1
					HNRNPA1P33
					MYC
					CDRT4
					CD99L2
					SRC
					RSL1D1
					DLEU1
					BTF3L4
					KIF1B
					AGPAT2
					DEGS1
					SRM
					QPCT
					ATP1A1
					SMIM30
					EIF5
					NMB
					TEKT4P2
					CDK5RAP2
					ILF2
					CRTAP
					GFOD1
					KLF10
					DYNC2LI1
					RPL18
					DLGAP4
					FNTA
					CYB5A
					PIGP
					TPM3
					PRDX3
					AKIRIN1
					YBX3P1
					TMEM14C
					CYP39A1
					TM9SF2
					CYP21A1P
					GNG12
					SH3BGRL
					ITGB3BP
					PGAM4
					ASPH
					MTPN
					TAOK1
					CD58
					RAD51C
					TYMS
					RNASE4
					STEAP1
					STAP2
					HIATL1
					TBCA
					ISCA1
					PRDX2
					RGPD1
					ADSS2
					RRAGA
					CAMSAP3
					FAM107B
					PDLIM5
					CUL5
					RPL13A
					EIF1B
					SELENOF
					BORCS7
					CDC123
					DTYMK
					GNAQ
					FAIM
					ACP1
					IRS2
					ATP5PO
					SMIM19
					PFN2
					NACA
					ITPR3
					PSMC4
					APIP
					SDHC
					PPP1CB
					ME2
					AP3M1
					HIF1A
					CHMP2B
					CD9
					MRPL21
					UNC13D
					BRI3
					PLCB4
					GBE1
					CAMSAP2
					RPS25
					PSMD7
					SEC61G
					STOM
					PARP8
					EEF1B2
					BCL3
					SLC1A4
					DTX2
					DYNLT1
					SEC23B
					MGC87042
					AGRN
					RPL35A
					FAM53B
					GTF2IP1
					ITM2B
					UQCR10
					VPS13C
					PIK3R2
					PDCD10
					RIDA
					NDUFB6
					CHMP5
					VKORC1
					MRPS28
					PLXNA1
					NDUFAF6
					TPRKB
					ACTG1
					COMMD10
					ANXA1
					CAPRIN1
					LETM1
					IQGAP1
					PLGRKT
					KLHL9
					KIF2A
					NHP2
					SLC25A5
					COMMD2
					ZNF512
					RPS26P11
					SIL1
					UCP2
					SERF1B
					PGK1
					RBBP8
					WFS1
					NME7
					RPL3
					UBB
					ARID4B
					MT1X
					MTHFD2
					DIP2C
					ATP2B1-AS1
					TRMT11
					E2F5
					LAPTM4B
					MYCBP2
					ZNHIT3
					RPL30
					WAC
					SLC35A3
					FANCL
					CDC5L
					CIAO2A
					SUPT5H
					C2CD2
					RPS15A
					MTFR1
					SRI
					ARMC10
					RPL12
					NAP1L5
					TPM4
					PDCD2
					PCNA
					ADAMTS1
					RPL23AP53
					RPL39L
					HDAC2
					MRPL39
					MEX3B
					DPY30
					RCN2
					ZFAND1
					RPL10
					KHSRP
					HINT1
					CARS1
					SPCS2
					AP1S1
					OAT
					RAB5C
					PSMA6
					ZFP36L2
					RTCA
					CCT2
					SNHG29
					SNHG32
					TPD52L1
					TCTEX1D2
					UCHL3
					DQ896551
					MYLK
					MGST3
					CCT7
					CHEK1
					C1QBP
					SPG21
					ASCL2
					PRMT6
					RFC4
					DCTN3
					CXCR4
					VPS26C
					DYNLT3
					SF3B5
					SH3GLB2
					ATP5MC2
					BTF3
					ACAT2
					MCL1
					ARPC3
					NR2F2
					MRPS35
					ERMP1
					RPL22
					VPS51
					UQCRFS1
					TSPAN3
					SLC25A24
					CITED2
					TMEM38B
					GCAT
					ADORA2A
					CPNE3
					MRPL45
					ID3
					DEAF1
					SLC6A10P
					SLC39A6
					DCTPP1

## Sheet: GO terms
Table SI. GO and KEGG enrichment analysis results of genes identified by WGCNA.
ONTOLOGY	ID	Description	GeneRatio	BgRatio	pvalue	p.adjust	qvalue	geneID	Count
BP	GO:1903131	mononuclear cell differentiation	84/1049	433/18800	3.33214e-24	1.42554e-20	1.18688e-20	SPN/LEP/LGALS1/STAT3/CD46/NFKBIZ/DNAJB9/IL10/RIPK2/IL18/KAT2A/ADAM17/PLA2G2D/AIRE/FOXO3/LILRB1/DCLRE1C/MYB/PRKDC/CHD7/FANCD2/DOCK2/TCIRG1/SYK/IRF8/CCR2/IFNG/PLCL2/IKZF1/CD79B/IL15/BCL11B/CR2/CD3G/CD27/SH3RF1/RUNX3/CD3D/ITM2A/DOCK10/CD3E/MFNG/HLA-G/HLA-DOA/PLCG2/ZC3H12A/VEGFA/LAG3/POU2AF1/RASGRP1/VCAM1/INPP5D/CD8A/LYL1/PIK3CD/SOX4/IFI16/IL7R/CD79A/GPR18/FES/CD2/LEF1/SASH3/ZAP70/CD83/CCR7/TMEM176A/…	84
BP	GO:0030098	lymphocyte differentiation	78/1049	382/18800	5.2419e-24	1.42554e-20	1.18688e-20	SPN/LEP/LGALS1/STAT3/CD46/NFKBIZ/DNAJB9/IL10/RIPK2/IL18/KAT2A/ADAM17/PLA2G2D/AIRE/FOXO3/DCLRE1C/MYB/PRKDC/CHD7/FANCD2/DOCK2/TCIRG1/SYK/IRF8/CCR2/IFNG/PLCL2/IKZF1/CD79B/IL15/BCL11B/CR2/CD3G/CD27/SH3RF1/RUNX3/CD3D/ITM2A/DOCK10/CD3E/MFNG/HLA-G/HLA-DOA/PLCG2/ZC3H12A/LAG3/POU2AF1/RASGRP1/VCAM1/INPP5D/CD8A/LYL1/PIK3CD/SOX4/IL7R/CD79A/GPR18/CD2/LEF1/SASH3/ZAP70/CD83/CCR7/SLAMF1/IL4R/BATF/PRDM1/IRF1/IL23…	78
BP	GO:0050863	regulation of T cell activation	71/1049	342/18800	2.21667e-22	4.01882e-19	3.346e-19	SPN/DUSP22/LEP/TNFSF14/LGALS1/CD46/NFKBIZ/IL10/RIPK2/IL18/KAT2A/PLA2G2D/FOXO3/LILRB1/MYB/FANCD2/RAC2/SYK/IDO1/LAT/RASAL3/HLA-DMA/LAX1/CCR2/FYN/IFNG/IL15/HLA-E/HLA-DPB1/CD27/CCL21/SH3RF1/RUNX3/CD3E/ICOS/HLA-G/HLA-DOA/ZC3H12A/LAG3/RASGRP1/VCAM1/SOX4/RIPOR2/HLA-DOB/DOCK8/IL7R/CD2/LEF1/SASH3/ZAP70/HLA-DMB/CD83/CORO1A/CCR7/SLAMF1/CD276/IL4R/PRDM1/IRF1/IL23A/CLECL1/CTLA4/PTPN6/TNFRSF14/CD6/HLA-DQB2/PYC…	71
BP	GO:0007159	leukocyte cell-cell adhesion	72/1049	381/18800	3.32946e-20	4.52724e-17	3.7693e-17	SPN/DUSP22/LEP/TNFSF14/LGALS1/CD46/GOLPH3/NFKBIZ/IL10/RIPK2/IL18/PLA2G2D/FOXO3/LILRB1/MYB/RAC2/SYK/IDO1/RASAL3/HLA-DMA/LAX1/CCR2/FYN/IFNG/MSN/IL15/HLA-E/HLA-DPB1/CD27/CCL21/RUNX3/CD3E/ICOS/HLA-G/HLA-DOA/ZC3H12A/LAG3/RASGRP1/VCAM1/SOX4/RIPOR2/HLA-DOB/DOCK8/IL7R/ITGB7/ITGAL/SKAP1/LEF1/SASH3/ZAP70/SEMA4D/HLA-DMB/CD83/CORO1A/CCR7/SLAMF1/CD276/IL4R/FERMT3/IRF1/IL23A/CLECL1/CTLA4/PTPN6/TNFRSF14/CD6/HLA…	72
BP	GO:0070661	leukocyte proliferation	65/1049	330/18800	2.5493e-19	2.77312e-16	2.30886e-16	SPN/LEP/TNFSF14/CD46/CSF2RA/KITLG/IL10/RIPK2/IL18/AHR/PLA2G2D/LILRB1/CTPS1/HPRT1/DOCK2/TCIRG1/RAC2/SYK/IDO1/RASAL3/CCR2/FYN/TNFRSF13B/TNFRSF4/PLCL2/MSN/MZB1/IL15/CR2/HLA-E/HLA-DPB1/SH3RF1/CD3E/PSMB10/HLA-G/RASGRP1/CD38/VCAM1/BTN3A1/INPP5D/TNFAIP3/DOCK8/IL7R/CD79A/LEF1/SASH3/ZAP70/HLA-DMB/CORO1A/SLAMF1/CD276/IRF1/IL23A/CLECL1/CTLA4/PTPN6/CD40/GAPT/TNFRSF14/CD6/PYCARD/CCL19/CD19/ADA/CCL5	65
BP	GO:0046651	lymphocyte proliferation	61/1049	296/18800	3.21625e-19	2.91553e-16	2.42742e-16	SPN/LEP/TNFSF14/CD46/IL10/RIPK2/IL18/AHR/PLA2G2D/LILRB1/CTPS1/HPRT1/DOCK2/RAC2/SYK/IDO1/RASAL3/CCR2/FYN/TNFRSF13B/TNFRSF4/PLCL2/MSN/MZB1/IL15/CR2/HLA-E/HLA-DPB1/SH3RF1/CD3E/PSMB10/HLA-G/RASGRP1/CD38/VCAM1/BTN3A1/INPP5D/DOCK8/IL7R/CD79A/LEF1/SASH3/ZAP70/HLA-DMB/CORO1A/SLAMF1/CD276/IRF1/IL23A/CLECL1/CTLA4/PTPN6/CD40/GAPT/TNFRSF14/CD6/PYCARD/CCL19/CD19/ADA/CCL5	61
BP	GO:0030217	T cell differentiation	57/1049	263/18800	4.05123e-19	3.1478e-16	2.62081e-16	SPN/LEP/STAT3/CD46/NFKBIZ/RIPK2/IL18/KAT2A/ADAM17/PLA2G2D/AIRE/FOXO3/MYB/PRKDC/CHD7/FANCD2/DOCK2/TCIRG1/SYK/CCR2/IFNG/IL15/BCL11B/CD3G/CD27/SH3RF1/RUNX3/CD3D/CD3E/HLA-G/HLA-DOA/ZC3H12A/LAG3/RASGRP1/CD8A/PIK3CD/SOX4/IL7R/GPR18/CD2/LEF1/SASH3/ZAP70/CD83/CCR7/IL4R/BATF/PRDM1/IRF1/IL23A/CTLA4/CCL19/SLAMF6/ADA/EOMES/ITK/ZNF683	57
BP	GO:0050870	positive regulation of T cell activation	52/1049	223/18800	5.05688e-19	3.43805e-16	2.86246e-16	LEP/TNFSF14/LGALS1/CD46/NFKBIZ/RIPK2/IL18/FOXO3/LILRB1/MYB/SYK/RASAL3/HLA-DMA/CCR2/FYN/IFNG/IL15/HLA-E/HLA-DPB1/CD27/CCL21/RUNX3/CD3E/ICOS/HLA-G/HLA-DOA/RASGRP1/VCAM1/SOX4/HLA-DOB/DOCK8/IL7R/LEF1/SASH3/ZAP70/HLA-DMB/CD83/CORO1A/CCR7/SLAMF1/CD276/IL4R/IL23A/CLECL1/PTPN6/TNFRSF14/CD6/HLA-DQB2/PYCARD/CCL19/ADA/CCL5	52
BP	GO:0032943	mononuclear cell proliferation	61/1049	300/18800	6.47388e-19	3.91238e-16	3.25738e-16	SPN/LEP/TNFSF14/CD46/IL10/RIPK2/IL18/AHR/PLA2G2D/LILRB1/CTPS1/HPRT1/DOCK2/RAC2/SYK/IDO1/RASAL3/CCR2/FYN/TNFRSF13B/TNFRSF4/PLCL2/MSN/MZB1/IL15/CR2/HLA-E/HLA-DPB1/SH3RF1/CD3E/PSMB10/HLA-G/RASGRP1/CD38/VCAM1/BTN3A1/INPP5D/DOCK8/IL7R/CD79A/LEF1/SASH3/ZAP70/HLA-DMB/CORO1A/SLAMF1/CD276/IRF1/IL23A/CLECL1/CTLA4/PTPN6/CD40/GAPT/TNFRSF14/CD6/PYCARD/CCL19/CD19/ADA/CCL5	61
BP	GO:0022409	positive regulation of cell-cell adhesion	59/1049	291/18800	2.8491e-18	1.54963e-15	1.29019e-15	LEP/TNFSF14/LGALS1/CD46/NFKBIZ/IL10/RIPK2/IL18/TJP1/FOXO3/PLAUR/LILRB1/MYB/SYK/RASAL3/HLA-DMA/CCR2/FYN/IFNG/IL15/HLA-E/HLA-DPB1/CXCL13/CD27/CCL21/RUNX3/CD3E/ICOS/HLA-G/HLA-DOA/RASGRP1/VCAM1/SOX4/HLA-DOB/DOCK8/SERPINF2/IL7R/SKAP1/LEF1/SASH3/ZAP70/HLA-DMB/CD83/CORO1A/CCR7/SLAMF1/CD276/IL4R/IL23A/CLECL1/PTPN6/TNFRSF14/CD6/HLA-DQB2/PYCARD/ADAM19/CCL19/ADA/CCL5	59
BP	GO:0002366	leukocyte activation involved in immune response	58/1049	285/18800	4.60901e-18	2.27895e-15	1.89741e-15	SPN/LGALS1/GRN/STAT3/CD46/NFKBIZ/IL10/RIPK2/IL18/EIF2AK4/LILRB1/MYB/MSH6/EXO1/UNG/DOCK2/RAC2/SYK/IRF8/DNASE1L3/LAT/CCR2/IFNG/PLCL2/ITM2A/DOCK10/PTGDS/APBB1IP/MFNG/NKG7/PLCG2/ZC3H12A/POU2AF1/RASGRP1/LAT2/PIK3CD/FES/ITGAL/LEF1/HLA-DMB/HLA-F/CORO1A/SLAMF1/IL4R/BATF/IL23A/LCP1/PTPN6/CD40/GAPT/FGR/PYCARD/CCL19/SLAMF6/CD19/ADA/EOMES/ZNF683	58
BP	GO:0022407	regulation of cell-cell adhesion	76/1049	456/18800	5.85304e-18	2.65289e-15	2.20875e-15	SPN/DUSP22/LEP/TNFSF14/LGALS1/CD46/NFKBIZ/IL10/RIPK2/IL18/NOTCH1/PLA2G2D/TJP1/FOXO3/PLAUR/LILRB1/MYB/GTPBP4/SYK/IDO1/RASAL3/HLA-DMA/LAX1/CCR2/FYN/IFNG/IL15/HLA-E/HLA-DPB1/CXCL13/CD27/CCL21/RUNX3/CD3E/ICOS/HLA-G/HLA-DOA/ZC3H12A/VEGFA/LAG3/RASGRP1/AKNA/VCAM1/SOX4/RIPOR2/HLA-DOB/DOCK8/CELSR2/SERPINF2/MBP/IL7R/SKAP1/LEF1/SASH3/ZAP70/HLA-DMB/CD83/CORO1A/CCR7/SLAMF1/CD276/IL4R/FERMT3/IRF1/IL23A/CLECL1/…	76
BP	GO:0002460	adaptive immune response based on somatic recombination of immune receptors built from immunoglobulin superfamily domains	67/1049	370/18800	7.24463e-18	3.03104e-15	2.5236e-15	SPN/DUSP22/STAT3/CD46/NFKBIZ/IL10/RIPK2/IL18/AHR/NOTCH1/ADAM17/AIRE/LILRB1/MSH6/EXO1/UNG/HPRT1/IL21R/WAS/TCIRG1/HLA-DMA/CCR2/CR2/LTA/HLA-E/HLA-DPB1/CXCL13/CD27/RFTN1/BTN3A3/CTSH/HLA-H/SERPING1/HLA-G/IL18BP/KLHL6/HLA-DOA/ZC3H12A/INPP5D/CD8A/TNFAIP3/MYO1G/HLA-DOB/IL7R/LEF1/BTN3A2/PRF1/SASH3/IGLL1/HLA-DMB/C7/HLA-F/CD1E/C3/SLAMF1/IL4R/BATF/IL23A/PTPN6/CD40/GAPT/HLA-DQB2/IGKC/CCL19/SLAMF6/CD19/ADA	67
BP	GO:1903039	positive regulation of leukocyte cell-cell adhesion	53/1049	245/18800	7.93568e-18	3.08301e-15	2.56686e-15	LEP/TNFSF14/LGALS1/CD46/NFKBIZ/RIPK2/IL18/FOXO3/LILRB1/MYB/SYK/RASAL3/HLA-DMA/CCR2/FYN/IFNG/IL15/HLA-E/HLA-DPB1/CD27/CCL21/RUNX3/CD3E/ICOS/HLA-G/HLA-DOA/RASGRP1/VCAM1/SOX4/HLA-DOB/DOCK8/IL7R/SKAP1/LEF1/SASH3/ZAP70/HLA-DMB/CD83/CORO1A/CCR7/SLAMF1/CD276/IL4R/IL23A/CLECL1/PTPN6/TNFRSF14/CD6/HLA-DQB2/PYCARD/CCL19/ADA/CCL5	53
BP	GO:0002263	cell activation involved in immune response	58/1049	289/18800	9.1537e-18	3.31913e-15	2.76346e-15	SPN/LGALS1/GRN/STAT3/CD46/NFKBIZ/IL10/RIPK2/IL18/EIF2AK4/LILRB1/MYB/MSH6/EXO1/UNG/DOCK2/RAC2/SYK/IRF8/DNASE1L3/LAT/CCR2/IFNG/PLCL2/ITM2A/DOCK10/PTGDS/APBB1IP/MFNG/NKG7/PLCG2/ZC3H12A/POU2AF1/RASGRP1/LAT2/PIK3CD/FES/ITGAL/LEF1/HLA-DMB/HLA-F/CORO1A/SLAMF1/IL4R/BATF/IL23A/LCP1/PTPN6/CD40/GAPT/FGR/PYCARD/CCL19/SLAMF6/CD19/ADA/EOMES/ZNF683	58
BP	GO:1903037	regulation of leukocyte cell-cell adhesion	64/1049	344/18800	9.96494e-18	3.38746e-15	2.82034e-15	SPN/DUSP22/LEP/TNFSF14/LGALS1/CD46/NFKBIZ/IL10/RIPK2/IL18/PLA2G2D/FOXO3/LILRB1/MYB/SYK/IDO1/RASAL3/HLA-DMA/LAX1/CCR2/FYN/IFNG/IL15/HLA-E/HLA-DPB1/CD27/CCL21/RUNX3/CD3E/ICOS/HLA-G/HLA-DOA/ZC3H12A/LAG3/RASGRP1/VCAM1/SOX4/RIPOR2/HLA-DOB/DOCK8/IL7R/SKAP1/LEF1/SASH3/ZAP70/HLA-DMB/CD83/CORO1A/CCR7/SLAMF1/CD276/IL4R/IRF1/IL23A/CLECL1/CTLA4/PTPN6/TNFRSF14/CD6/HLA-DQB2/PYCARD/CCL19/ADA/CCL5	64
BP	GO:0002443	leukocyte mediated immunity	74/1049	457/18800	8.34441e-17	2.66972e-14	2.22276e-14	DUSP22/LEP/CD46/IL10/IL18/AHR/ADAM17/AIRE/LILRB1/MSH6/EXO1/UNG/HPRT1/IL21R/WAS/TCIRG1/RAC2/SYK/DNASE1L3/LAT/HLA-DMA/CCR2/CR2/LTA/HLA-E/HLA-DPB1/CD27/RFTN1/BTN3A3/PTGDS/GZMB/CTSH/HLA-H/SERPING1/HLA-G/NKG7/HLA-DOA/PLCG2/LAG3/RASGRP1/KIR2DL4/LAT2/INPP5D/CD8A/PIK3CD/MYO1G/HLA-DOB/IL7R/FES/CD96/BTN3A2/PRF1/SASH3/IGLL1/HLA-DMB/C7/HLA-F/CORO1A/CD1E/C3/SLAMF1/SH2D1A/IL4R/BATF/IL23A/PTPN6/CD40/SPON2/GAPT/…	74
BP	GO:0042098	T cell proliferation	46/1049	204/18800	2.24562e-16	6.78552e-14	5.64951e-14	SPN/LEP/TNFSF14/CD46/IL10/RIPK2/IL18/PLA2G2D/LILRB1/CTPS1/DOCK2/RAC2/SYK/IDO1/RASAL3/CCR2/FYN/TNFRSF4/MSN/IL15/HLA-E/HLA-DPB1/SH3RF1/CD3E/PSMB10/HLA-G/RASGRP1/VCAM1/BTN3A1/DOCK8/SASH3/ZAP70/HLA-DMB/CORO1A/SLAMF1/CD276/IRF1/IL23A/CLECL1/CTLA4/PTPN6/TNFRSF14/CD6/PYCARD/CCL19/CCL5	46
BP	GO:0045785	positive regulation of cell adhesion	71/1049	446/18800	8.98475e-16	2.572e-13	2.14141e-13	TPM1/LEP/TNFSF14/LGALS1/CD46/NFKBIZ/ITGAV/HSD17B12/IL10/RIPK2/IL18/TJP1/FOXO3/PLAUR/LILRB1/MYB/SYK/RASAL3/HLA-DMA/CCR2/FYN/IFNG/IL15/HLA-E/HLA-DPB1/CXCL13/CD27/CCL21/RUNX3/TGM2/CD3E/APBB1IP/ICOS/HLA-G/HLA-DOA/VEGFA/RASGRP1/VCAM1/PLEKHA2/SOX4/HLA-DOB/DOCK8/SERPINF2/SPOCK2/IL7R/RHOD/SKAP1/LEF1/SASH3/ZAP70/HLA-DMB/CD83/CORO1A/CCR7/ADGRG1/SLAMF1/RAC3/CD276/IL4R/IL23A/CLECL1/PTPN6/TNFRSF14/CD6/HLA-DQB…	71
BP	GO:0046631	alpha-beta T cell activation	39/1049	158/18800	1.77033e-15	4.81443e-13	4.00841e-13	SPN/STAT3/NFKBIZ/RIPK2/IL18/PLA2G2D/LILRB1/MYB/DOCK2/TCIRG1/SYK/RASAL3/CCR2/IFNG/IL15/BCL11B/HLA-E/SH3RF1/RUNX3/CD3E/NKG7/ZC3H12A/GPR18/LEF1/SASH3/ZAP70/CD83/IL4R/BATF/PRDM1/IRF1/IL23A/TNFRSF14/CCL19/SLAMF6/ADA/EOMES/ITK/ZNF683	39
BP	GO:0002449	lymphocyte mediated immunity	62/1049	365/18800	2.93685e-15	7.60644e-13	6.33299e-13	DUSP22/LEP/CD46/IL10/IL18/AHR/AIRE/LILRB1/MSH6/EXO1/UNG/HPRT1/IL21R/WAS/TCIRG1/HLA-DMA/CCR2/CR2/LTA/HLA-E/HLA-DPB1/CD27/RFTN1/BTN3A3/GZMB/CTSH/HLA-H/SERPING1/HLA-G/NKG7/HLA-DOA/LAG3/RASGRP1/KIR2DL4/INPP5D/CD8A/MYO1G/HLA-DOB/IL7R/CD96/BTN3A2/PRF1/SASH3/IGLL1/HLA-DMB/C7/HLA-F/CORO1A/CD1E/C3/SLAMF1/SH2D1A/IL4R/BATF/IL23A/PTPN6/CD40/GAPT/HLA-DQB2/IGKC/SLAMF6/CD19	62
BP	GO:0051251	positive regulation of lymphocyte activation	62/1049	371/18800	6.42323e-15	1.588e-12	1.32214e-12	LEP/TNFSF14/LGALS1/CD46/NFKBIZ/BLOC1S6/IL10/RIPK2/IL18/FOXO3/LILRB1/MYB/PRKDC/SYK/RASAL3/HLA-DMA/CCR2/FYN/IFNG/TNFRSF4/IL15/HLA-E/HLA-DPB1/CD27/CCL21/RUNX3/CD3E/ICOS/HLA-G/HLA-DOA/RASGRP1/CD38/VCAM1/INPP5D/SOX4/HLA-DOB/DOCK8/IL7R/LEF1/SASH3/IGLL1/ZAP70/HLA-DMB/CD83/HLA-F/CORO1A/CCR7/SLAMF1/CD276/IL4R/IL23A/CLECL1/PTPN6/CD40/TNFRSF14/CD6/HLA-DQB2/PYCARD/IGKC/CCL19/ADA/CCL5	62
BP	GO:0050867	positive regulation of cell activation	67/1049	436/18800	3.46276e-14	8.18867e-12	6.81775e-12	LEP/TNFSF14/LGALS1/CD46/NFKBIZ/BLOC1S6/IL10/RIPK2/IL18/FOXO3/LILRB1/GP1BB/MYB/PRKDC/SYK/RASAL3/HLA-DMA/CCR2/FYN/IFNG/TNFRSF4/IL15/HLA-E/HLA-DPB1/CD27/CCL21/CEBPA/RUNX3/CD3E/ICOS/HLA-G/HLA-DOA/RASGRP1/CD38/VCAM1/INPP5D/SOX4/HLA-DOB/DOCK8/IL7R/CD2/LEF1/SASH3/IGLL1/ZAP70/PLEK/HLA-DMB/CD83/HLA-F/CORO1A/CCR7/SLAMF1/CD276/IL4R/IL23A/CLECL1/PTPN6/CD40/TNFRSF14/CD6/FGR/HLA-DQB2/PYCARD/IGKC/CCL19/ADA/CCL5	67
BP	GO:0002696	positive regulation of leukocyte activation	65/1049	421/18800	6.74995e-14	1.52971e-11	1.27361e-11	LEP/TNFSF14/LGALS1/CD46/NFKBIZ/BLOC1S6/IL10/RIPK2/IL18/FOXO3/LILRB1/MYB/PRKDC/SYK/RASAL3/HLA-DMA/CCR2/FYN/IFNG/TNFRSF4/IL15/HLA-E/HLA-DPB1/CD27/CCL21/CEBPA/RUNX3/CD3E/ICOS/HLA-G/HLA-DOA/RASGRP1/CD38/VCAM1/INPP5D/SOX4/HLA-DOB/DOCK8/IL7R/CD2/LEF1/SASH3/IGLL1/ZAP70/HLA-DMB/CD83/HLA-F/CORO1A/CCR7/SLAMF1/CD276/IL4R/IL23A/CLECL1/PTPN6/CD40/TNFRSF14/CD6/FGR/HLA-DQB2/PYCARD/IGKC/CCL19/ADA/CCL5	65
BP	GO:0002285	lymphocyte activation involved in immune response	42/1049	201/18800	7.50256e-14	1.58879e-11	1.3228e-11	SPN/LGALS1/STAT3/CD46/NFKBIZ/IL10/RIPK2/IL18/EIF2AK4/LILRB1/MYB/MSH6/EXO1/UNG/IRF8/IFNG/PLCL2/ITM2A/DOCK10/APBB1IP/MFNG/NKG7/PLCG2/ZC3H12A/POU2AF1/ITGAL/LEF1/HLA-DMB/HLA-F/CORO1A/IL4R/BATF/IL23A/LCP1/CD40/GAPT/CCL19/SLAMF6/CD19/ADA/EOMES/ZNF683	42
BP	GO:0001819	positive regulation of cytokine production	70/1049	475/18800	7.59487e-14	1.58879e-11	1.3228e-11	SPN/LEP/STAT3/CD46/CCBE1/IL10/RIPK2/IL18/KAT2A/ADAM17/SPTBN1/AIRE/LILRB1/POLR3A/SLC7A5/SYK/IRF8/IDO1/CCR2/GSDMD/IFNG/IL15/LTA/HLA-E/HLA-DPB1/AIM2/RFTN1/GBP5/CD3E/HLA-G/IRF5/PLCG2/STAT1/POU2AF1/RASGRP1/KIR2DL4/BTN3A1/PIK3CD/SERPINF2/MBP/IFI16/CYBA/CD2/BTN3A2/SASH3/CD83/HLA-F/LTB/CCR7/MCOLN2/C3/SLAMF1/CD276/IL4R/BATF/IRF1/IL23A/CLECL1/GPSM3/CD40/SPON2/TNFRSF14/CD6/FGR/PYCARD/CASP1/CCL19/SLAMF6/PYHI…	70
BP	GO:0045619	regulation of lymphocyte differentiation	39/1049	181/18800	2.07531e-13	4.1806e-11	3.4807e-11	CD46/NFKBIZ/IL10/RIPK2/IL18/KAT2A/FOXO3/MYB/PRKDC/FANCD2/SYK/CCR2/IFNG/IL15/CD27/SH3RF1/RUNX3/HLA-G/HLA-DOA/ZC3H12A/LAG3/RASGRP1/INPP5D/SOX4/IL7R/CD2/LEF1/SASH3/ZAP70/CD83/IL4R/PRDM1/IRF1/IL23A/CTLA4/PTPN6/CCL19/ADA/ZNF683	39
BP	GO:0070663	regulation of leukocyte proliferation	47/1049	254/18800	2.88753e-13	5.60903e-11	4.66999e-11	SPN/LEP/CD46/CSF2RA/KITLG/IL10/RIPK2/IL18/AHR/PLA2G2D/LILRB1/RAC2/SYK/IDO1/RASAL3/CCR2/TNFRSF13B/TNFRSF4/MZB1/IL15/HLA-E/HLA-DPB1/SH3RF1/CD3E/HLA-G/CD38/VCAM1/INPP5D/TNFAIP3/SASH3/ZAP70/HLA-DMB/CORO1A/SLAMF1/CD276/IRF1/IL23A/CLECL1/CTLA4/PTPN6/CD40/TNFRSF14/CD6/PYCARD/CCL19/ADA/CCL5	47
BP	GO:0045580	regulation of T cell differentiation	35/1049	151/18800	3.69896e-13	6.93746e-11	5.77601e-11	CD46/NFKBIZ/RIPK2/IL18/KAT2A/FOXO3/MYB/FANCD2/SYK/CCR2/IFNG/IL15/CD27/SH3RF1/RUNX3/HLA-G/HLA-DOA/ZC3H12A/LAG3/RASGRP1/SOX4/IL7R/CD2/LEF1/SASH3/ZAP70/CD83/IL4R/PRDM1/IRF1/IL23A/CTLA4/CCL19/ADA/ZNF683	35
BP	GO:0050670	regulation of lymphocyte proliferation	44/1049	230/18800	5.02436e-13	9.10917e-11	7.58415e-11	SPN/LEP/CD46/IL10/RIPK2/IL18/AHR/PLA2G2D/LILRB1/RAC2/SYK/IDO1/RASAL3/CCR2/TNFRSF13B/TNFRSF4/MZB1/IL15/HLA-E/HLA-DPB1/SH3RF1/CD3E/HLA-G/CD38/VCAM1/INPP5D/SASH3/ZAP70/HLA-DMB/CORO1A/SLAMF1/CD276/IRF1/IL23A/CLECL1/CTLA4/PTPN6/CD40/TNFRSF14/CD6/PYCARD/CCL19/ADA/CCL5	44
BP	GO:0032944	regulation of mononuclear cell proliferation	44/1049	233/18800	8.03035e-13	1.40894e-10	1.17306e-10	SPN/LEP/CD46/IL10/RIPK2/IL18/AHR/PLA2G2D/LILRB1/RAC2/SYK/IDO1/RASAL3/CCR2/TNFRSF13B/TNFRSF4/MZB1/IL15/HLA-E/HLA-DPB1/SH3RF1/CD3E/HLA-G/CD38/VCAM1/INPP5D/SASH3/ZAP70/HLA-DMB/CORO1A/SLAMF1/CD276/IRF1/IL23A/CLECL1/CTLA4/PTPN6/CD40/TNFRSF14/CD6/PYCARD/CCL19/ADA/CCL5	44
BP	GO:1902105	regulation of leukocyte differentiation	49/1049	283/18800	1.20456e-12	2.04738e-10	1.70461e-10	GPR137B/CREB1/CD46/NFKBIZ/KITLG/IL10/RIPK2/IL18/TRIB1/KAT2A/FOXO3/LILRB1/MYB/PRKDC/FANCD2/SYK/CCR2/IFNG/IL15/CD27/HCLS1/SH3RF1/RUNX3/HLA-G/HLA-DOA/ZC3H12A/LAG3/RASGRP1/INPP5D/SOX4/IL7R/FES/CD2/LEF1/SASH3/ZAP70/CD83/RASSF2/TMEM176A/IL4R/PRDM1/IRF1/IL23A/CTLA4/PTPN6/EVI2B/CCL19/ADA/ZNF683	49
BP	GO:0046632	alpha-beta T cell differentiation	29/1049	111/18800	1.5636e-12	2.57709e-10	2.14564e-10	SPN/STAT3/NFKBIZ/RIPK2/IL18/PLA2G2D/MYB/SYK/IFNG/BCL11B/SH3RF1/RUNX3/ZC3H12A/GPR18/LEF1/SASH3/ZAP70/CD83/IL4R/BATF/PRDM1/IRF1/IL23A/CCL19/SLAMF6/ADA/EOMES/ITK/ZNF683	29
BP	GO:0042113	B cell activation	54/1049	336/18800	1.85022e-12	2.95981e-10	2.46429e-10	LGALS1/DNAJB9/IL10/AHR/ADAM17/DCLRE1C/SKAP2/PRKDC/MSH6/EXO1/UNG/CTPS1/TCIRG1/SYK/IRF8/LAX1/TNFRSF13B/TNFRSF4/PLCL2/CD79B/MZB1/CR2/CD27/ITM2A/DOCK10/MFNG/PLCG2/POU2AF1/RASGRP1/CD38/VCAM1/LAT2/INPP5D/LYL1/TNFAIP3/PIK3CD/CXCR5/IL7R/CD79A/BANK1/LEF1/SASH3/IGLL1/ZAP70/TBC1D10C/PRKCB/BATF/CTLA4/PTPN6/CD40/GAPT/IGKC/CD19/ADA	54
BP	GO:0000819	sister chromatid segregation	40/1049	205/18800	3.00141e-12	4.66419e-10	3.88332e-10	HNRNPU/STAG3L2/NUMA1/TACC3/AKAP8L/CHMP1A/CDCA5/DLGAP5/NDC80/PSRC1/KIF4A/NCAPG/KIF2C/CDC20/NUSAP1/PTTG1/BUB1/PRC1/RACGAP1/CDT1/KIF14/KNTC1/FEN1/TOP2A/FBXO5/KIF23/UBE2C/RMI2/CCNB1/NEK2/CENPF/CDCA8/KIFC1/TRIP13/TTK/SMC4/PTTG3P/CENPE/AURKB/REC8	40
BP	GO:0002831	regulation of response to biotic stimulus	55/1049	351/18800	3.25506e-12	4.91786e-10	4.09453e-10	RBM14/LEP/ATG12/GRN/TIGAR/RIPK2/TRIB1/AHR/EIF2AK4/SASH1/PPM1B/LILRB1/PRKDC/COCH/LRP8/SYK/STAT2/RNF125/FYN/APOBEC3F/APOE/TSPAN32/IL15/HLA-E/APOBEC3G/AIM2/GBP5/SERPING1/HLA-G/IKBKE/TSPAN6/PLCG2/ZC3H12A/STAT1/LAG3/RASGRP1/KIR2DL4/MICB/TNFAIP3/NR1H3/IFI16/CYBA/CD96/BIRC3/HLA-F/SH2D1A/SYT11/IRF1/IL23A/PTPN6/FGR/PYCARD/SLAMF6/PYHIN1/CCL5	55
BP	GO:0000070	mitotic sister chromatid segregation	36/1049	171/18800	3.61228e-12	5.31005e-10	4.42106e-10	HNRNPU/NUMA1/TACC3/AKAP8L/CHMP1A/CDCA5/DLGAP5/NDC80/PSRC1/KIF4A/NCAPG/KIF2C/CDC20/NUSAP1/PTTG1/BUB1/PRC1/RACGAP1/CDT1/KIF14/KNTC1/FBXO5/KIF23/UBE2C/CCNB1/NEK2/CENPF/CDCA8/KIFC1/TRIP13/TTK/SMC4/PTTG3P/CENPE/AURKB/REC8	36
BP	GO:0042129	regulation of T cell proliferation	36/1049	174/18800	6.18661e-12	8.85499e-10	7.37252e-10	SPN/LEP/CD46/IL10/RIPK2/IL18/PLA2G2D/LILRB1/RAC2/SYK/IDO1/RASAL3/CCR2/IL15/HLA-E/HLA-DPB1/SH3RF1/CD3E/HLA-G/VCAM1/SASH3/ZAP70/HLA-DMB/CORO1A/SLAMF1/CD276/IRF1/IL23A/CLECL1/CTLA4/PTPN6/TNFRSF14/CD6/PYCARD/CCL19/CCL5	36
BP	GO:0002768	immune response-regulating cell surface receptor signaling pathway	52/1049	328/18800	8.15159e-12	1.13683e-09	9.46509e-10	DUSP22/MAPK9/NFKBIZ/PLEKHA1/RIPK2/MAP3K1/LILRB1/SYK/LAX1/FYN/PLCL2/CD79B/CR2/HLA-DPB1/RFTN1/BTN3A3/HLA-G/LPXN/KLHL6/PLCG2/ZC3H12A/CD38/LAT2/BTN3A1/INPP5D/MICB/CD8A/PRKCH/PIK3CD/MYO1G/CD79A/BANK1/SKAP1/BTN3A2/IGLL1/ZAP70/PRKCB/CCR7/FYB1/CD276/SH2D1A/CD247/CTLA4/PTPN6/PVRIG/LIME1/CD40/FGR/IGKC/CD19/ADA/ITK	52
BP	GO:0002253	activation of immune response	57/1049	386/18800	1.53283e-11	2.08426e-09	1.73532e-09	RBM14/DUSP22/CD46/NFKBIZ/PLEKHA1/RIPK2/PRKDC/SYK/LAX1/FYN/PLCL2/CD79B/CR2/HLA-DPB1/AIM2/RFTN1/BTN3A3/SERPING1/LPXN/KLHL6/PLCG2/ZC3H12A/CD38/LAT2/BTN3A1/INPP5D/MICB/CD8A/PRKCH/PIK3CD/MYO1G/IFI16/CD79A/BANK1/SKAP1/BTN3A2/IGLL1/ZAP70/C7/PRKCB/CCR7/C3/FYB1/CD276/SH2D1A/CD247/CTLA4/PTPN6/PVRIG/LIME1/FGR/PYCARD/IGKC/CD19/ADA/PYHIN1/ITK	57
BP	GO:0050851	antigen receptor-mediated signaling pathway	43/1049	244/18800	1.60381e-11	2.12759e-09	1.7714e-09	DUSP22/NFKBIZ/PLEKHA1/RIPK2/SYK/LAX1/FYN/PLCL2/CD79B/HLA-DPB1/RFTN1/BTN3A3/LPXN/KLHL6/PLCG2/ZC3H12A/CD38/LAT2/BTN3A1/INPP5D/CD8A/PRKCH/PIK3CD/CD79A/BANK1/SKAP1/BTN3A2/IGLL1/ZAP70/PRKCB/CCR7/FYB1/CD276/SH2D1A/CD247/CTLA4/PTPN6/PVRIG/LIME1/IGKC/CD19/ADA/ITK	43
BP	GO:0019882	antigen processing and presentation	27/1049	107/18800	2.21697e-11	2.87098e-09	2.39033e-09	RAB32/SAR1B/WAS/PSME1/HLA-DMA/TAPBPL/HLA-E/HLA-DPB1/RFTN1/CCL21/RAB8B/CTSH/HLA-H/HLA-G/ERAP2/HLA-DOA/CD8A/HLA-DOB/TAP2/HLA-DMB/HLA-F/CCR7/CD1E/HLA-DQB2/PYCARD/CCL19/TAP1	27
BP	GO:0002683	negative regulation of immune system process	60/1049	425/18800	2.96156e-11	3.71558e-09	3.09353e-09	SPN/DUSP22/GPR137B/GRN/CD46/KITLG/IL10/TRIB1/AHR/PLA2G2D/SELENOS/LILRB1/SYK/STAT2/IDO1/LAX1/CCR2/FYN/TNFRSF13B/PLCL2/TSPAN32/CR2/TAPBPL/HLA-E/CCL21/RUNX3/SERPING1/HLA-G/LPXN/HLA-DOA/ZC3H12A/LAG3/KIR2DL4/INPP5D/TNFAIP3/RIPOR2/HLA-DOB/NR1H3/IFI16/IL7R/BANK1/GPR18/SOX9/CD300LF/CD96/CST7/TBC1D10C/HLA-F/TMEM176A/SLAMF1/SH2D1A/SYT11/IL4R/IRF1/CTLA4/PTPN6/PVRIG/TNFRSF14/FGR/ADA	60
BP	GO:1903706	regulation of hemopoiesis	55/1049	371/18800	3.0058e-11	3.71558e-09	3.09353e-09	GPR137B/RBFOX2/CREB1/STAT3/CD46/NFKBIZ/H4C8/KITLG/IL10/RIPK2/IL18/TRIB1/KAT2A/FOXO3/LILRB1/MYB/PRKDC/FANCD2/H4C3/SYK/CCR2/IFNG/IL15/CD27/HCLS1/SH3RF1/RUNX3/HLA-G/HLA-DOA/ZC3H12A/STAT1/LAG3/RASGRP1/INPP5D/SOX4/IL7R/FES/CD2/LEF1/SASH3/ZAP70/CD83/RASSF2/TMEM176A/IL4R/PRDM1/IRF1/CSF3R/IL23A/CTLA4/PTPN6/EVI2B/CCL19/ADA/ZNF683	55
BP	GO:0002429	immune response-activating cell surface receptor signaling pathway	47/1049	300/18800	1.25762e-10	1.487e-08	1.23805e-08	DUSP22/NFKBIZ/PLEKHA1/RIPK2/SYK/LAX1/FYN/PLCL2/CD79B/CR2/HLA-DPB1/RFTN1/BTN3A3/LPXN/KLHL6/PLCG2/ZC3H12A/CD38/LAT2/BTN3A1/INPP5D/MICB/CD8A/PRKCH/PIK3CD/MYO1G/CD79A/BANK1/SKAP1/BTN3A2/IGLL1/ZAP70/PRKCB/CCR7/FYB1/CD276/SH2D1A/CD247/CTLA4/PTPN6/PVRIG/LIME1/FGR/IGKC/CD19/ADA/ITK	47
BP	GO:0002757	immune response-activating signal transduction	47/1049	300/18800	1.25762e-10	1.487e-08	1.23805e-08	DUSP22/NFKBIZ/PLEKHA1/RIPK2/SYK/LAX1/FYN/PLCL2/CD79B/CR2/HLA-DPB1/RFTN1/BTN3A3/LPXN/KLHL6/PLCG2/ZC3H12A/CD38/LAT2/BTN3A1/INPP5D/MICB/CD8A/PRKCH/PIK3CD/MYO1G/CD79A/BANK1/SKAP1/BTN3A2/IGLL1/ZAP70/PRKCB/CCR7/FYB1/CD276/SH2D1A/CD247/CTLA4/PTPN6/PVRIG/LIME1/FGR/IGKC/CD19/ADA/ITK	47
BP	GO:0045621	positive regulation of lymphocyte differentiation	26/1049	107/18800	1.2892e-10	1.49191e-08	1.24214e-08	CD46/NFKBIZ/IL10/RIPK2/IL18/FOXO3/MYB/PRKDC/SYK/IFNG/IL15/CD27/RUNX3/HLA-G/RASGRP1/INPP5D/SOX4/IL7R/LEF1/SASH3/ZAP70/CD83/IL4R/IL23A/CCL19/ADA	26
BP	GO:0002697	regulation of immune effector process	52/1049	353/18800	1.32611e-10	1.50265e-08	1.25108e-08	DUSP22/LEP/GRN/CD46/NFKBIZ/DNAJB9/IL10/RIPK2/IL18/AHR/LILRB1/MYB/SLC7A5/WAS/RAC2/SYK/DNASE1L3/CCR2/IFNG/TNFRSF4/MZB1/CR2/LTA/HLA-E/HLA-H/SERPING1/HLA-G/PLCG2/ZC3H12A/LAG3/RASGRP1/KIR2DL4/IL7R/FES/CD96/SASH3/HLA-DMB/HLA-F/CD1E/C3/SLAMF1/SH2D1A/IL4R/IL23A/PTPN6/CD40/SPON2/TNFRSF14/FGR/CCL19/SLAMF6/ZNF683	52
BP	GO:1902107	positive regulation of leukocyte differentiation	32/1049	157/18800	1.3844e-10	1.50595e-08	1.25383e-08	CREB1/CD46/NFKBIZ/KITLG/IL10/RIPK2/IL18/TRIB1/FOXO3/MYB/PRKDC/SYK/IFNG/IL15/CD27/HCLS1/RUNX3/HLA-G/RASGRP1/INPP5D/SOX4/IL7R/FES/LEF1/SASH3/ZAP70/CD83/IL4R/IL23A/EVI2B/CCL19/ADA	32
BP	GO:1903708	positive regulation of hemopoiesis	32/1049	157/18800	1.3844e-10	1.50595e-08	1.25383e-08	CREB1/CD46/NFKBIZ/KITLG/IL10/RIPK2/IL18/TRIB1/FOXO3/MYB/PRKDC/SYK/IFNG/IL15/CD27/HCLS1/RUNX3/HLA-G/RASGRP1/INPP5D/SOX4/IL7R/FES/LEF1/SASH3/ZAP70/CD83/IL4R/IL23A/EVI2B/CCL19/ADA	32
BP	GO:0140014	mitotic nuclear division	46/1049	293/18800	1.84442e-10	1.96702e-08	1.63771e-08	HNRNPU/BCCIP/NUMA1/TACC3/AKAP8L/CHMP1A/CDCA5/DLGAP5/NDC80/PSRC1/KIF11/KIF4A/NCAPG/KIF2C/CDC20/NUSAP1/PTTG1/BUB1/PRC1/RACGAP1/PKMYT1/CDT1/KIF14/CDCA2/KNTC1/FBXO5/KIF23/UBE2C/CCNB1/UBE2S/NEK2/CENPF/CDCA8/KIFC1/KIF15/AURKA/TRIP13/TTK/KIF20B/SMC4/PTTG3P/CENPE/TPX2/ANLN/AURKB/REC8	46
BP	GO:0007059	chromosome segregation	51/1049	348/18800	2.41177e-10	2.52262e-08	2.10029e-08	HNRNPU/STAG3L2/TOP3A/NUMA1/TACC3/AKAP8L/DMC1/CHMP1A/CDCA5/DLGAP5/CENPW/NDC80/PSRC1/KIF4A/NCAPG/KIF2C/CDC20/NUSAP1/PTTG1/BUB1/PRC1/RACGAP1/CDT1/FANCD2/KIF14/CDCA2/HJURP/KNTC1/FEN1/CENPN/TOP2A/FBXO5/KIF23/UBE2C/RMI2/CCNB1/NEK2/CENPF/CDCA8/SKA1/KIFC1/TRIP13/TTK/SMC4/PTTG3P/CENPE/AURKB/ECT2/OIP5/SRPK1/REC8	51
BP	GO:0002819	regulation of adaptive immune response	35/1049	188/18800	2.65526e-10	2.72489e-08	2.2687e-08	DUSP22/CD46/NFKBIZ/IL10/RIPK2/IL18/AHR/EIF2AK4/LILRB1/WAS/CCR2/CR2/LTA/HLA-E/HLA-H/CD48/HLA-G/ZC3H12A/TNFAIP3/IL7R/SKAP1/SASH3/HLA-F/CD1E/C3/SLAMF1/IL4R/IRF1/IL23A/PTPN6/CD40/TNFRSF14/PYCARD/CCL19/ADA	35
BP	GO:0046634	regulation of alpha-beta T cell activation	25/1049	105/18800	4.64842e-10	4.68199e-08	3.89815e-08	NFKBIZ/RIPK2/IL18/LILRB1/MYB/SYK/RASAL3/CCR2/IFNG/HLA-E/SH3RF1/RUNX3/CD3E/ZC3H12A/SASH3/ZAP70/CD83/IL4R/PRDM1/IRF1/IL23A/TNFRSF14/CCL19/ADA/ZNF683	25
BP	GO:0002764	immune response-regulating signaling pathway	62/1049	482/18800	6.67071e-10	6.59672e-08	5.49232e-08	DUSP22/MAPK9/NFKBIZ/PLEKHA1/RIPK2/MAP3K1/LILRB1/SYK/RNF125/LAX1/FYN/PLCL2/CD79B/CR2/HLA-DPB1/RFTN1/BTN3A3/CTSH/HLA-G/LPXN/TSPAN6/KLHL6/PLCG2/ZC3H12A/CD38/LAT2/BTN3A1/INPP5D/MICB/CD8A/PRKCH/TNFAIP3/PIK3CD/MYO1G/NR1H3/CD79A/BANK1/CYBA/SKAP1/CD300LF/BTN3A2/IGLL1/UNC93B1/ZAP70/BIRC3/PRKCB/CCR7/FYB1/CD276/SH2D1A/IRF1/CD247/CTLA4/PTPN6/PVRIG/LIME1/CD40/FGR/IGKC/CD19/ADA/ITK	62
BP	GO:0000727	double-strand break repair via break-induced replication	9/1049	12/18800	9.57925e-10	9.30384e-08	7.74623e-08	MCMDC2/MCM7/CDC45/CDC7/MCM6/MCM4/MCM2/MCM5/GINS2	9
BP	GO:0002699	positive regulation of immune effector process	40/1049	248/18800	1.26589e-09	1.20793e-07	1.0057e-07	CD46/NFKBIZ/DNAJB9/IL10/RIPK2/IL18/LILRB1/MYB/SLC7A5/RAC2/SYK/CCR2/IFNG/TNFRSF4/MZB1/LTA/HLA-E/HLA-H/HLA-G/PLCG2/LAG3/RASGRP1/KIR2DL4/FES/SASH3/HLA-DMB/HLA-F/CD1E/C3/SLAMF1/SH2D1A/IL4R/IL23A/PTPN6/CD40/SPON2/TNFRSF14/FGR/CCL19/SLAMF6	40
BP	GO:0050852	T cell receptor signaling pathway	27/1049	127/18800	1.42503e-09	1.33633e-07	1.11261e-07	DUSP22/NFKBIZ/RIPK2/FYN/HLA-DPB1/RFTN1/BTN3A3/PLCG2/ZC3H12A/BTN3A1/INPP5D/CD8A/PIK3CD/SKAP1/BTN3A2/ZAP70/CCR7/FYB1/CD276/SH2D1A/CD247/CTLA4/PTPN6/PVRIG/LIME1/ADA/ITK	27
BP	GO:0000280	nuclear division	58/1049	446/18800	1.58546e-09	1.46158e-07	1.21689e-07	HNRNPU/BCCIP/NUMA1/TACC3/CDC25B/AKAP8L/DMC1/C11orf80/CHMP1A/SPIRE2/MASTL/CDCA5/DLGAP5/CKS2/NDC80/PSRC1/KIF11/KIF4A/NCAPG/KIF2C/CDC20/NUSAP1/PTTG1/BUB1/PRC1/RACGAP1/PKMYT1/CDT1/FANCD2/KIF14/CDCA2/KNTC1/MND1/TOP2A/FBXO5/KIF23/UBE2C/CCNB1/UBE2S/NEK2/CENPF/CDCA8/KIFC1/CCNB2/KIF15/AURKA/TRIP13/TTK/KIF20B/SMC4/PTTG3P/CENPE/ASPM/TPX2/ANLN/AURKB/REC8/SLC2A8	58
BP	GO:0042102	positive regulation of T cell proliferation	24/1049	103/18800	1.6526e-09	1.49808e-07	1.24728e-07	LEP/CD46/RIPK2/IL18/SYK/RASAL3/CCR2/IL15/HLA-E/HLA-DPB1/CD3E/VCAM1/SASH3/ZAP70/HLA-DMB/CORO1A/SLAMF1/CD276/IL23A/CLECL1/CD6/PYCARD/CCL19/CCL5	24
BP	GO:0002456	T cell mediated immunity	25/1049	112/18800	1.97959e-09	1.76508e-07	1.46958e-07	DUSP22/CD46/IL18/AHR/AIRE/LILRB1/HPRT1/WAS/CCR2/HLA-E/RFTN1/BTN3A3/CTSH/HLA-H/HLA-G/CD8A/MYO1G/IL7R/BTN3A2/PRF1/SASH3/HLA-F/CD1E/SLAMF1/IL23A	25
BP	GO:0009615	response to virus	53/1049	392/18800	2.05769e-09	1.80512e-07	1.50291e-07	NDUFAF4/IFNAR2/TRIM13/ZMYND11/ATG12/ILF3/EIF5A/ATAD3A/EIF2AK4/PPM1B/CRCP/LILRB1/POLR3A/SKP2/APOBEC3B/STMN1/STAT2/RNF125/APOBEC3F/IFNG/TSPAN32/IL15/APOBEC3G/AIM2/IRF5/IKBKE/TSPAN6/CCL22/ZC3H12A/STAT1/POU2AF1/MICB/DDIT4/TNFAIP3/IFI16/ITGAX/MLKL/PRF1/UNC93B1/BIRC3/CXCL9/PIM2/IRF1/IL23A/ISG20/ENO1/CD40/SPON2/FGR/BNIP3/PYCARD/CCL19/CCL5	53
BP	GO:0019221	cytokine-mediated signaling pathway	61/1049	486/18800	2.40658e-09	2.07768e-07	1.72984e-07	IFNAR2/LEP/EIF5A/STAT3/IL11RA/CSF2RA/TNFRSF25/IL17RD/RIPK2/IL18/SPPL2A/NOTCH1/ADAM17/FOXO3/LILRB1/IL17RB/IL37/LRP8/IL21R/SYK/STAT2/NOL3/CCR2/IFNG/TNFRSF4/IL15/CXCL13/TNFRSF17/AIM2/CCL21/CEBPA/STAT5A/IRF5/IKBKE/CCL22/STAT1/IL2RB/TNFAIP3/NR1H3/CXCR5/IL7R/CXCR3/IL10RA/CD300LF/CXCL11/BIRC3/CCR7/CXCL9/IL4R/IRF1/CSF3R/PXDN/PTPN6/TNFRSF14/CXCR6/KRT18/PYCARD/CASP1/CCL19/STAT4/CCL5	61
BP	GO:0072678	T cell migration	19/1049	67/18800	2.44714e-09	2.07969e-07	1.73152e-07	SPN/TNFSF14/ADAM17/AIRE/CCR2/MSN/CXCL13/CCL21/PIK3CD/MYO1G/RIPOR2/DOCK8/ITGB7/ITGAL/CXCL11/ZAP70/TNFRSF14/PYCARD/CCL5	19
BP	GO:0070665	positive regulation of leukocyte proliferation	30/1049	158/18800	3.07604e-09	2.57393e-07	2.14301e-07	LEP/CD46/CSF2RA/KITLG/RIPK2/IL18/SYK/RASAL3/CCR2/TNFRSF4/IL15/HLA-E/HLA-DPB1/CD3E/CD38/VCAM1/SASH3/ZAP70/HLA-DMB/CORO1A/SLAMF1/CD276/IL23A/CLECL1/CD40/CD6/PYCARD/CCL19/ADA/CCL5	30
BP	GO:0098813	nuclear chromosome segregation	43/1049	287/18800	3.14964e-09	2.59559e-07	2.16105e-07	HNRNPU/STAG3L2/NUMA1/TACC3/AKAP8L/DMC1/CHMP1A/CDCA5/DLGAP5/NDC80/PSRC1/KIF4A/NCAPG/KIF2C/CDC20/NUSAP1/PTTG1/BUB1/PRC1/RACGAP1/CDT1/FANCD2/KIF14/KNTC1/FEN1/TOP2A/FBXO5/KIF23/UBE2C/RMI2/CCNB1/NEK2/CENPF/CDCA8/KIFC1/TRIP13/TTK/SMC4/PTTG3P/CENPE/AURKB/ECT2/REC8	43
BP	GO:0032735	positive regulation of interleukin-12 production	15/1049	42/18800	3.40712e-09	2.76587e-07	2.30281e-07	LEP/RIPK2/SYK/IRF8/IDO1/IFNG/HLA-G/IRF5/PLCG2/LTB/CCR7/IRF1/IL23A/CD40/CCL19	15
BP	GO:0050671	positive regulation of lymphocyte proliferation	28/1049	141/18800	3.61686e-09	2.89296e-07	2.40863e-07	LEP/CD46/RIPK2/IL18/SYK/RASAL3/CCR2/TNFRSF4/IL15/HLA-E/HLA-DPB1/CD3E/CD38/VCAM1/SASH3/ZAP70/HLA-DMB/CORO1A/SLAMF1/CD276/IL23A/CLECL1/CD40/CD6/PYCARD/CCL19/ADA/CCL5	28
BP	GO:0051607	defense response to virus	43/1049	290/18800	4.34319e-09	3.42357e-07	2.8504e-07	NDUFAF4/IFNAR2/TRIM13/ZMYND11/ATG12/ILF3/ATAD3A/EIF2AK4/PPM1B/CRCP/LILRB1/POLR3A/SKP2/APOBEC3B/STAT2/RNF125/APOBEC3F/IFNG/TSPAN32/IL15/APOBEC3G/AIM2/IRF5/TSPAN6/ZC3H12A/STAT1/MICB/DDIT4/TNFAIP3/IFI16/ITGAX/MLKL/PRF1/UNC93B1/BIRC3/CXCL9/IRF1/IL23A/ISG20/CD40/SPON2/BNIP3/PYCARD	43
BP	GO:0140546	defense response to symbiont	43/1049	291/18800	4.82839e-09	3.75166e-07	3.12357e-07	NDUFAF4/IFNAR2/TRIM13/ZMYND11/ATG12/ILF3/ATAD3A/EIF2AK4/PPM1B/CRCP/LILRB1/POLR3A/SKP2/APOBEC3B/STAT2/RNF125/APOBEC3F/IFNG/TSPAN32/IL15/APOBEC3G/AIM2/IRF5/TSPAN6/ZC3H12A/STAT1/MICB/DDIT4/TNFAIP3/IFI16/ITGAX/MLKL/PRF1/UNC93B1/BIRC3/CXCL9/IRF1/IL23A/ISG20/CD40/SPON2/BNIP3/PYCARD	43
BP	GO:0032946	positive regulation of mononuclear cell proliferation	28/1049	143/18800	5.03119e-09	3.85417e-07	3.20892e-07	LEP/CD46/RIPK2/IL18/SYK/RASAL3/CCR2/TNFRSF4/IL15/HLA-E/HLA-DPB1/CD3E/CD38/VCAM1/SASH3/ZAP70/HLA-DMB/CORO1A/SLAMF1/CD276/IL23A/CLECL1/CD40/CD6/PYCARD/CCL19/ADA/CCL5	28
BP	GO:2000106	regulation of leukocyte apoptotic process	21/1049	85/18800	5.57549e-09	4.14298e-07	3.44938e-07	KITLG/IL10/ADAM17/SELENOS/LILRB1/AURKB/IDO1/CD3G/GIMAP8/CD27/HCLS1/CCL21/PIK3CD/DOCK8/EFNA1/IL7R/CCR7/HSH2D/CCL19/ADA/CCL5	21
BP	GO:0032615	interleukin-12 production	18/1049	63/18800	5.63671e-09	4.14298e-07	3.44938e-07	LEP/IL10/RIPK2/LILRB1/SYK/IRF8/IDO1/IFNG/HLA-G/IRF5/PLCG2/LTB/CCR7/SLAMF1/IRF1/IL23A/CD40/CCL19	18
BP	GO:0032655	regulation of interleukin-12 production	18/1049	63/18800	5.63671e-09	4.14298e-07	3.44938e-07	LEP/IL10/RIPK2/LILRB1/SYK/IRF8/IDO1/IFNG/HLA-G/IRF5/PLCG2/LTB/CCR7/SLAMF1/IRF1/IL23A/CD40/CCL19	18
BP	GO:2000107	negative regulation of leukocyte apoptotic process	16/1049	50/18800	6.43094e-09	4.66371e-07	3.88293e-07	KITLG/SELENOS/LILRB1/AURKB/IDO1/CD27/HCLS1/CCL21/DOCK8/EFNA1/IL7R/CCR7/HSH2D/CCL19/ADA/CCL5	16
BP	GO:0045582	positive regulation of T cell differentiation	22/1049	94/18800	7.19651e-09	5.08385e-07	4.23273e-07	CD46/NFKBIZ/RIPK2/IL18/FOXO3/MYB/SYK/IFNG/CD27/RUNX3/HLA-G/RASGRP1/SOX4/IL7R/LEF1/SASH3/ZAP70/CD83/IL4R/IL23A/CCL19/ADA	22
BP	GO:0002274	myeloid leukocyte activation	37/1049	232/18800	7.19721e-09	5.08385e-07	4.23273e-07	GPR137B/GRN/IL10/SHPK/IL18/SNCA/DOCK2/RAC2/SYK/DNASE1L3/LAT/CCR2/IFNG/TSPAN32/IL15/NDRG1/CEBPA/PTGDS/PLCG2/ZC3H12A/RASGRP1/LAT2/PIK3CD/NR1H3/FES/CD2/CD300LF/CST7/SLAMF1/SYT11/IL4R/BATF/PTPN6/UBD/FGR/PYCARD/CCL5	37
BP	GO:0033045	regulation of sister chromatid segregation	19/1049	72/18800	9.14397e-09	6.37616e-07	5.30868e-07	HNRNPU/NUMA1/TACC3/DLGAP5/NDC80/PTTG1/BUB1/CDT1/KNTC1/FBXO5/UBE2C/RMI2/CCNB1/CENPF/TRIP13/TTK/PTTG3P/CENPE/AURKB	19
BP	GO:0048285	organelle fission	60/1049	493/18800	1.04505e-08	7.19498e-07	5.99042e-07	HNRNPU/BCCIP/NUMA1/TACC3/CDC25B/AKAP8L/DMC1/C11orf80/CHMP1A/SPIRE2/MASTL/CDCA5/DLGAP5/CKS2/NDC80/PSRC1/KIF11/KIF4A/NCAPG/KIF2C/CDC20/NUSAP1/PTTG1/BUB1/PRC1/RACGAP1/PKMYT1/CDT1/FANCD2/KIF14/CDCA2/KNTC1/MND1/TOP2A/FBXO5/KIF23/UBE2C/CCNB1/UBE2S/NEK2/CENPF/CDCA8/KIFC1/CCNB2/KIF15/AURKA/TRIP13/TTK/KIF20B/SMC4/PTTG3P/CENPE/ASPM/TPX2/ANLN/AURKB/REC8/STAT2/SLC2A8/BNIP3	60
BP	GO:0031349	positive regulation of defense response	42/1049	289/18800	1.19702e-08	8.13825e-07	6.77577e-07	RBM14/LGALS1/GRN/NFKBIZ/PDCD4/RIPK2/IL18/SNCA/PRKDC/COCH/SYK/IDO1/CCR2/FYN/IFNG/IL15/LTA/HLA-E/AIM2/CEBPA/GBP5/HLA-G/NKG7/IKBKE/PLCG2/LAG3/RASGRP1/KIR2DL4/IFI16/NUPR1/CYBA/HLA-F/CCR7/C3/SH2D1A/IL23A/GPSM3/PYCARD/CASP1/SLAMF6/PYHIN1/CCL5	42
BP	GO:0007051	spindle organization	32/1049	188/18800	1.50946e-08	1.01358e-06	8.43887e-07	HAUS2/HNRNPU/BCCIP/NUMA1/SAC3D1/TACC3/GOLGA8B/CHMP1A/AUNIP/DLGAP5/NDC80/PSRC1/KIF11/KIF4A/CDC20/PRC1/RACGAP1/STMN1/FBXO5/KIF23/CCNB1/NEK2/KIFC1/CCNB2/KIF15/AURKA/TTK/CENPE/ASPM/STIL/TPX2/AURKB	32
BP	GO:0046633	alpha-beta T cell proliferation	14/1049	40/18800	1.54172e-08	1.02261e-06	8.51408e-07	RIPK2/IL18/DOCK2/SYK/RASAL3/CCR2/IL15/HLA-E/SH3RF1/CD3E/ZAP70/IRF1/IL23A/TNFRSF14	14
BP	GO:0046637	regulation of alpha-beta T cell differentiation	18/1049	67/18800	1.64896e-08	1.08057e-06	8.99662e-07	NFKBIZ/RIPK2/IL18/MYB/SYK/IFNG/SH3RF1/RUNX3/ZC3H12A/SASH3/ZAP70/CD83/IL4R/PRDM1/IL23A/CCL19/ADA/ZNF683	18
BP	GO:0007052	mitotic spindle organization	25/1049	124/18800	1.79213e-08	1.1604e-06	9.66132e-07	HNRNPU/BCCIP/NUMA1/TACC3/CHMP1A/DLGAP5/NDC80/PSRC1/KIF11/KIF4A/CDC20/PRC1/RACGAP1/STMN1/KIF23/CCNB1/NEK2/KIFC1/KIF15/AURKA/TTK/CENPE/STIL/TPX2/AURKB	25
BP	GO:0051983	regulation of chromosome segregation	21/1049	91/18800	2.05786e-08	1.31679e-06	1.09634e-06	HNRNPU/NUMA1/TACC3/DLGAP5/NDC80/KIF2C/PTTG1/BUB1/CDT1/CDCA2/KNTC1/FBXO5/UBE2C/RMI2/CCNB1/CENPF/TRIP13/TTK/PTTG3P/CENPE/AURKB	21
BP	GO:0033044	regulation of chromosome organization	34/1049	212/18800	2.52644e-08	1.59783e-06	1.33032e-06	HNRNPU/NUMA1/TACC3/MPHOSPH8/GNL3L/HNRNPA2B1/CDCA5/DLGAP5/CENPV/NDC80/NCAPG/PTTG1/BUB1/CDT1/KNTC1/FEN1/TOP2A/FBXO5/UBE2C/PARP1/RMI2/CCNB1/NEK2/CENPF/TRIP13/TTK/SMC4/PTTG3P/CENPE/AURKB/MCM2/DKC1/TINF2/ATF7IP2	34
BP	GO:0046635	positive regulation of alpha-beta T cell activation	18/1049	69/18800	2.72855e-08	1.70582e-06	1.42024e-06	NFKBIZ/RIPK2/IL18/MYB/SYK/RASAL3/CCR2/IFNG/HLA-E/RUNX3/CD3E/SASH3/ZAP70/CD83/IL4R/IL23A/CCL19/ADA	18
BP	GO:0032729	positive regulation of interferon-gamma production	19/1049	77/18800	3.02224e-08	1.86795e-06	1.55522e-06	RIPK2/IL18/LILRB1/SLC7A5/IRF8/CCR2/LTA/HLA-DPB1/CD3E/RASGRP1/BTN3A1/CD2/BTN3A2/SASH3/SLAMF1/CD276/IL23A/PYCARD/SLAMF6	19
BP	GO:0140694	non-membrane-bounded organelle assembly	49/1049	379/18800	3.58157e-08	2.18878e-06	1.82234e-06	RBM14/MRPL20/TPM1/HAUS2/HNRNPU/BCCIP/MAPK9/LMOD3/GSN/NUMA1/SAC3D1/KAT2A/NGRN/RPS27L/GOLGA8B/CHMP1A/ASAP1/DLGAP5/CENPW/PRKDC/NDC80/KIF11/KIF4A/CDC20/PRC1/RACGAP1/RPF2/CENPA/KNTC1/CENPN/FBXO5/KIF23/NEK2/CENPF/KIFC1/CCNB2/KIF15/AURKA/CENPE/ASPM/STIL/TPX2/ANLN/AURKB/CIRBP/UBAP2L/MSN/PLA2G4C/LCP1	49
BP	GO:0002703	regulation of leukocyte mediated immunity	36/1049	236/18800	3.74701e-08	2.24878e-06	1.8723e-06	DUSP22/LEP/CD46/IL10/IL18/AHR/LILRB1/WAS/RAC2/SYK/DNASE1L3/CCR2/CR2/LTA/HLA-E/HLA-H/HLA-G/PLCG2/LAG3/RASGRP1/KIR2DL4/IL7R/FES/CD96/SASH3/HLA-F/CD1E/C3/SLAMF1/SH2D1A/IL4R/IL23A/PTPN6/CD40/FGR/SLAMF6	36
BP	GO:0045058	T cell selection	15/1049	49/18800	3.76244e-08	2.24878e-06	1.8723e-06	SPN/STAT3/AIRE/DOCK2/SYK/IL15/BCL11B/CD3G/CD3D/CD3E/ZAP70/CCR7/BATF/IL23A/SLAMF6	15
BP	GO:0032103	positive regulation of response to external stimulus	54/1049	442/18800	5.04205e-08	2.98084e-06	2.4818e-06	RBM14/TNFSF14/LGALS1/GRN/NFKBIZ/PDCD4/RIPK2/IL18/ADAM17/SNCA/SASH1/PRKDC/COCH/RAC2/SYK/IDO1/CCR2/FYN/IFNG/IL15/LTA/HLA-E/CXCL13/AIM2/CCL21/CEBPA/GBP5/HLA-G/NKG7/IKBKE/PLCG2/VEGFA/LAG3/RASGRP1/KIR2DL4/RIPOR2/SERPINF2/IFI16/NUPR1/CYBA/HLA-F/CCR7/C3/SLAMF1/SH2D1A/IL23A/GPSM3/PYCARD/CASP1/CCL19/SLAMF6/GHRL/PYHIN1/CCL5	54
BP	GO:0050777	negative regulation of immune response	30/1049	179/18800	6.06131e-08	3.54489e-06	2.95142e-06	DUSP22/GRN/CD46/IL10/AHR/SELENOS/LILRB1/SYK/STAT2/CCR2/FYN/CR2/HLA-E/SERPING1/HLA-G/ZC3H12A/KIR2DL4/INPP5D/TNFAIP3/NR1H3/IFI16/IL7R/CD96/HLA-F/SLAMF1/IL4R/CTLA4/PTPN6/TNFRSF14/FGR	30
BP	GO:0045088	regulation of innate immune response	35/1049	231/18800	6.8648e-08	3.97209e-06	3.3071e-06	RBM14/LEP/GRN/LILRB1/PRKDC/COCH/LRP8/SYK/STAT2/FYN/APOE/HLA-E/AIM2/GBP5/SERPING1/HLA-G/IKBKE/PLCG2/LAG3/RASGRP1/KIR2DL4/TNFAIP3/NR1H3/IFI16/CD96/BIRC3/HLA-F/SH2D1A/IRF1/PTPN6/FGR/PYCARD/SLAMF6/PYHIN1/CCL5	35
BP	GO:1902850	microtubule cytoskeleton organization involved in mitosis	27/1049	151/18800	6.97042e-08	3.99075e-06	3.32263e-06	HNRNPU/BCCIP/NUMA1/TACC3/CHMP1A/DLGAP5/NDC80/PSRC1/KIF11/KIF4A/CDC20/NUSAP1/PRC1/RACGAP1/CENPA/STMN1/KIF23/CCNB1/NEK2/KIFC1/KIF15/AURKA/TTK/CENPE/STIL/TPX2/AURKB	27
BP	GO:0032640	tumor necrosis factor production	30/1049	182/18800	8.88466e-08	4.98182e-06	4.14778e-06	SPN/LEP/TSPO/STAT3/IL10/RIPK2/SELENOS/LILRB1/IL37/SYK/CCR2/IFNG/HLA-E/PLCG2/ZC3H12A/RASGRP1/TNFAIP3/CYBA/GPR18/CD2/SASH3/UBE2J1/SLAMF1/SYT11/IL23A/PTPN6/SPON2/PYCARD/CCL19/GHRL	30
BP	GO:0032680	regulation of tumor necrosis factor production	30/1049	182/18800	8.88466e-08	4.98182e-06	4.14778e-06	SPN/LEP/TSPO/STAT3/IL10/RIPK2/SELENOS/LILRB1/IL37/SYK/CCR2/IFNG/HLA-E/PLCG2/ZC3H12A/RASGRP1/TNFAIP3/CYBA/GPR18/CD2/SASH3/UBE2J1/SLAMF1/SYT11/IL23A/PTPN6/SPON2/PYCARD/CCL19/GHRL	30
BP	GO:0043367	CD4-positive, alpha-beta T cell differentiation	19/1049	82/18800	8.99446e-08	4.99193e-06	4.15619e-06	SPN/STAT3/NFKBIZ/RIPK2/IL18/PLA2G2D/MYB/IFNG/SH3RF1/RUNX3/ZC3H12A/LEF1/SASH3/CD83/IL4R/BATF/IL23A/CCL19/SLAMF6	19
BP	GO:0002822	regulation of adaptive immune response based on somatic recombination of immune receptors built from immunoglobulin superfamily domains	29/1049	173/18800	9.98576e-08	5.43451e-06	4.52468e-06	DUSP22/CD46/NFKBIZ/IL10/RIPK2/IL18/AHR/LILRB1/WAS/CCR2/CR2/LTA/HLA-E/HLA-H/HLA-G/ZC3H12A/TNFAIP3/IL7R/SASH3/HLA-F/CD1E/C3/SLAMF1/IL4R/IL23A/PTPN6/CD40/CCL19/ADA	29
BP	GO:0002695	negative regulation of leukocyte activation	31/1049	193/18800	9.99175e-08	5.43451e-06	4.52468e-06	SPN/DUSP22/GRN/IL10/PLA2G2D/LILRB1/IDO1/LAX1/CCR2/TNFRSF13B/TSPAN32/RUNX3/HLA-G/ZC3H12A/LAG3/INPP5D/TNFAIP3/RIPOR2/NR1H3/BANK1/CD300LF/CST7/TBC1D10C/HLA-F/SYT11/IL4R/IRF1/CTLA4/PTPN6/TNFRSF14/FGR	31
BP	GO:0032609	interferon-gamma production	23/1049	117/18800	1.07896e-07	5.75341e-06	4.79019e-06	IL10/RIPK2/IL18/LILRB1/SLC7A5/IRF8/CCR2/LTA/HLA-DPB1/CD3E/ZC3H12A/RASGRP1/BTN3A1/CD2/CD96/BTN3A2/SASH3/CCR7/SLAMF1/CD276/IL23A/PYCARD/SLAMF6	23
BP	GO:0032649	regulation of interferon-gamma production	23/1049	117/18800	1.07896e-07	5.75341e-06	4.79019e-06	IL10/RIPK2/IL18/LILRB1/SLC7A5/IRF8/CCR2/LTA/HLA-DPB1/CD3E/ZC3H12A/RASGRP1/BTN3A1/CD2/CD96/BTN3A2/SASH3/CCR7/SLAMF1/CD276/IL23A/PYCARD/SLAMF6	23
BP	GO:0033047	regulation of mitotic sister chromatid segregation	14/1049	46/18800	1.16327e-07	6.11096e-06	5.08788e-06	HNRNPU/NUMA1/NDC80/PTTG1/BUB1/CDT1/KNTC1/FBXO5/CCNB1/CENPF/TRIP13/TTK/PTTG3P/AURKB	14
BP	GO:0006310	DNA recombination	43/1049	324/18800	1.16849e-07	6.11096e-06	5.08788e-06	NUCKS1/MCM8/TOP3A/IL10/XRCC2/MCMDC2/INIP/DMC1/C11orf80/MORF4L2/DCLRE1C/MRGBP/AUNIP/PRKDC/MSH6/MCM7/EXO1/CDC45/BLM/FANCD2/FEN1/MND1/TOP2A/POLQ/H2AX/PARP1/RMI2/HROB/UNG/CDC7/MCM6/TRIP13/MCM4/MCM2/MCM5/WAS/REC8/BCL11B/IL7R/LEF1/GINS2/BATF/CD40	43
BP	GO:0071887	leukocyte apoptotic process	22/1049	109/18800	1.24609e-07	6.45473e-06	5.3741e-06	DFFA/KITLG/IL10/ADAM17/SELENOS/LILRB1/AURKB/IDO1/CD3G/GIMAP8/CD27/HCLS1/CCL21/PIK3CD/DOCK8/EFNA1/IL7R/CCR7/HSH2D/CCL19/ADA/CCL5	22
BP	GO:0002706	regulation of lymphocyte mediated immunity	29/1049	175/18800	1.29001e-07	6.61922e-06	5.51105e-06	DUSP22/LEP/CD46/IL10/IL18/AHR/LILRB1/WAS/CCR2/CR2/LTA/HLA-E/HLA-H/HLA-G/LAG3/RASGRP1/KIR2DL4/IL7R/CD96/SASH3/HLA-F/CD1E/C3/SLAMF1/SH2D1A/IL23A/PTPN6/CD40/SLAMF6	29
BP	GO:0072676	lymphocyte migration	23/1049	119/18800	1.49291e-07	7.58873e-06	6.31825e-06	SPN/TNFSF14/ADAM17/AIRE/CCR2/MSN/CXCL13/CCL21/CH25H/CCL22/PIK3CD/MYO1G/RIPOR2/DOCK8/ITGB7/ITGAL/CXCL11/ZAP70/CCR7/TNFRSF14/PYCARD/CCL19/CCL5	23
BP	GO:0048872	homeostasis of number of cells	39/1049	282/18800	1.52248e-07	7.66736e-06	6.38372e-06	HIPK2/TNFSF14/RBFOX2/STAT3/KITLG/ARMCX1/OCIAD1/NOTCH1/ADAM17/FOXO3/RPS24/PRKDC/CCNB2/UBAP2L/TCIRG1/LAT/CCR2/TNFRSF13B/IKZF1/TNFRSF17/HCLS1/DOCK10/STAT1/VEGFA/INPP5D/TNFAIP3/PIK3CD/SOX4/KLF2/IL7R/SOX9/SASH3/RASSF2/CORO1A/CCR7/ADGRG1/RAC3/GAPT/ADA	39
BP	GO:0071706	tumor necrosis factor superfamily cytokine production	30/1049	187/18800	1.645e-07	8.06702e-06	6.71647e-06	SPN/LEP/TSPO/STAT3/IL10/RIPK2/SELENOS/LILRB1/IL37/SYK/CCR2/IFNG/HLA-E/PLCG2/ZC3H12A/RASGRP1/TNFAIP3/CYBA/GPR18/CD2/SASH3/UBE2J1/SLAMF1/SYT11/IL23A/PTPN6/SPON2/PYCARD/CCL19/GHRL	30
BP	GO:1903555	regulation of tumor necrosis factor superfamily cytokine production	30/1049	187/18800	1.645e-07	8.06702e-06	6.71647e-06	SPN/LEP/TSPO/STAT3/IL10/RIPK2/SELENOS/LILRB1/IL37/SYK/CCR2/IFNG/HLA-E/PLCG2/ZC3H12A/RASGRP1/TNFAIP3/CYBA/GPR18/CD2/SASH3/UBE2J1/SLAMF1/SYT11/IL23A/PTPN6/SPON2/PYCARD/CCL19/GHRL	30
BP	GO:0051383	kinetochore organization	10/1049	23/18800	1.64633e-07	8.06702e-06	6.71647e-06	DLGAP5/CENPW/NDC80/CENPA/CDT1/KNTC1/CENPN/CENPF/SMC4/CENPE	10
BP	GO:0035710	CD4-positive, alpha-beta T cell activation	21/1049	102/18800	1.68219e-07	8.16911e-06	6.80147e-06	SPN/STAT3/NFKBIZ/RIPK2/IL18/PLA2G2D/MYB/TCIRG1/IFNG/SH3RF1/RUNX3/NKG7/ZC3H12A/LEF1/SASH3/CD83/IL4R/BATF/IL23A/CCL19/SLAMF6	21
BP	GO:0001771	immunological synapse formation	8/1049	14/18800	2.03307e-07	9.77731e-06	8.14043e-06	DOCK2/MSN/CCL21/DOCK8/PRF1/CCR7/CD6/CCL19	8
BP	GO:0051225	spindle assembly	23/1049	121/18800	2.0493e-07	9.77731e-06	8.14043e-06	HAUS2/HNRNPU/BCCIP/NUMA1/SAC3D1/GOLGA8B/CHMP1A/NDC80/KIF11/KIF4A/CDC20/PRC1/RACGAP1/FBXO5/KIF23/NEK2/KIFC1/CCNB2/KIF15/AURKA/ASPM/TPX2/AURKB	23
BP	GO:0048002	antigen processing and presentation of peptide antigen	16/1049	63/18800	2.40925e-07	1.13947e-05	9.48705e-06	SAR1B/HLA-DMA/TAPBPL/HLA-E/HLA-DPB1/HLA-H/HLA-G/ERAP2/HLA-DOA/HLA-DOB/TAP2/HLA-DMB/HLA-F/HLA-DQB2/PYCARD/TAP1	16
BP	GO:0030183	B cell differentiation	25/1049	142/18800	2.87529e-07	1.34816e-05	1.12246e-05	LGALS1/DNAJB9/IL10/ADAM17/DCLRE1C/PRKDC/TCIRG1/SYK/IRF8/PLCL2/CD79B/CR2/CD27/ITM2A/DOCK10/MFNG/PLCG2/POU2AF1/VCAM1/INPP5D/LYL1/CD79A/PTPN6/CD19/ADA	25
BP	GO:1905818	regulation of chromosome separation	17/1049	72/18800	3.18659e-07	1.48136e-05	1.23335e-05	NUMA1/TACC3/DLGAP5/NDC80/PTTG1/BUB1/CDT1/KNTC1/FBXO5/UBE2C/CCNB1/CENPF/TRIP13/TTK/PTTG3P/CENPE/AURKB	17
BP	GO:0050900	leukocyte migration	47/1049	384/18800	3.51565e-07	1.62048e-05	1.34918e-05	SPN/LEP/TNFSF14/GOLPH3/MTUS1/KITLG/IL10/ADAM17/AIRE/RAC2/SYK/CCR2/FYN/MSN/CXADR/CXCL13/CCL21/JAML/CH25H/CCL22/VEGFA/VCAM1/PIK3CD/MYO1G/RIPOR2/DOCK8/CXCR5/ITGB7/GPR18/ITGAL/CXCR3/CXCL11/ZAP70/CORO1A/CCR7/MCOLN2/CXCL9/SLAMF1/CSF3R/IL23A/GPSM3/TNFRSF14/PYCARD/SELL/CCL19/ADA/CCL5	47
BP	GO:0046638	positive regulation of alpha-beta T cell differentiation	14/1049	50/18800	3.68812e-07	1.68569e-05	1.40347e-05	NFKBIZ/RIPK2/IL18/MYB/SYK/IFNG/RUNX3/SASH3/ZAP70/CD83/IL4R/IL23A/CCL19/ADA	14
BP	GO:0010965	regulation of mitotic sister chromatid separation	16/1049	65/18800	3.83489e-07	1.73816e-05	1.44716e-05	TACC3/DLGAP5/NDC80/PTTG1/BUB1/CDT1/KNTC1/FBXO5/UBE2C/CCNB1/CENPF/TRIP13/TTK/PTTG3P/CENPE/AURKB	16
BP	GO:0002286	T cell activation involved in immune response	22/1049	116/18800	3.90756e-07	1.75647e-05	1.4624e-05	SPN/STAT3/CD46/NFKBIZ/RIPK2/IL18/EIF2AK4/LILRB1/MYB/IFNG/APBB1IP/ZC3H12A/ITGAL/LEF1/HLA-DMB/IL4R/BATF/IL23A/LCP1/CCL19/SLAMF6/EOMES	22
BP	GO:0000725	recombinational repair	27/1049	164/18800	3.97409e-07	1.77173e-05	1.47511e-05	NUCKS1/MCM8/TOP3A/XRCC2/MCMDC2/INIP/DMC1/MORF4L2/MRGBP/AUNIP/MCM7/CDC45/BLM/FEN1/POLQ/H2AX/PARP1/RMI2/HROB/CDC7/MCM6/MCM4/MCM2/MCM5/WAS/REC8/GINS2	27
BP	GO:0050866	negative regulation of cell activation	32/1049	216/18800	4.16996e-07	1.84394e-05	1.53523e-05	SPN/DUSP22/GRN/IL10/PLA2G2D/LILRB1/IDO1/LAX1/CCR2/TNFRSF13B/APOE/TSPAN32/RUNX3/HLA-G/ZC3H12A/LAG3/INPP5D/TNFAIP3/RIPOR2/NR1H3/BANK1/CD300LF/CST7/TBC1D10C/HLA-F/SYT11/IL4R/IRF1/CTLA4/PTPN6/TNFRSF14/FGR	32
BP	GO:0046640	regulation of alpha-beta T cell proliferation	12/1049	37/18800	4.32033e-07	1.89502e-05	1.57776e-05	RIPK2/IL18/SYK/RASAL3/CCR2/HLA-E/SH3RF1/CD3E/ZAP70/IRF1/IL23A/TNFRSF14	12
BP	GO:0034508	centromere complex assembly	11/1049	31/18800	4.6673e-07	2.03083e-05	1.69084e-05	DLGAP5/CENPW/CENPV/CENPA/HJURP/KNTC1/CENPN/NASP/CENPF/CENPE/OIP5	11
BP	GO:0050688	regulation of defense response to virus	17/1049	74/18800	4.85204e-07	2.08399e-05	1.73509e-05	ATG12/EIF2AK4/PPM1B/LILRB1/RNF125/APOBEC3F/TSPAN32/IL15/APOBEC3G/AIM2/TSPAN6/ZC3H12A/STAT1/MICB/TNFAIP3/IL23A/PYCARD	17
BP	GO:0046629	gamma-delta T cell activation	9/1049	20/18800	4.86609e-07	2.08399e-05	1.73509e-05	LILRB1/SYK/CXADR/JAML/MICB/SOX4/GPR18/LEF1/ITK	9
BP	GO:0042100	B cell proliferation	20/1049	100/18800	5.39087e-07	2.2907e-05	1.9072e-05	IL10/AHR/CTPS1/TNFRSF13B/TNFRSF4/PLCL2/MZB1/CR2/RASGRP1/CD38/INPP5D/IL7R/CD79A/LEF1/SASH3/CTLA4/CD40/GAPT/CD19/ADA	20
BP	GO:0044772	mitotic cell cycle phase transition	51/1049	440/18800	6.0927e-07	2.56885e-05	2.13878e-05	CDK10/CRADD/PRMT2/TACC3/CDC25B/INIP/ADAM17/RPS27L/MASTL/CDCA5/MELK/DLGAP5/PRKDC/CKS2/NDC80/SKP2/BUB1/BLM/CDC25A/PKMYT1/CDT1/CCNA2/KIF14/RRM1/KNTC1/FBXO5/UBE2C/NASP/E2F7/CCNB1/UBE2S/CENPF/CDC7/CCNB2/AURKA/TRIP13/TTK/CENPE/STIL/ANLN/AURKB/PSME1/PSME2/CTDSPL/BRSK1/CCND2/EIF4EBP1/CCNY/PIM2/PTPN6/UBD	51
BP	GO:0002275	myeloid cell activation involved in immune response	19/1049	93/18800	7.3165e-07	3.06111e-05	2.54863e-05	GRN/DOCK2/RAC2/SYK/DNASE1L3/LAT/CCR2/IFNG/PTGDS/PLCG2/RASGRP1/LAT2/PIK3CD/FES/SLAMF1/IL4R/PTPN6/FGR/PYCARD	19
BP	GO:0051306	mitotic sister chromatid separation	16/1049	68/18800	7.42495e-07	3.08277e-05	2.56666e-05	TACC3/DLGAP5/NDC80/PTTG1/BUB1/CDT1/KNTC1/FBXO5/UBE2C/CCNB1/CENPF/TRIP13/TTK/PTTG3P/CENPE/AURKB	16
BP	GO:0001909	leukocyte mediated cytotoxicity	23/1049	131/18800	8.94994e-07	3.68778e-05	3.07039e-05	LEP/IL18/LILRB1/HPRT1/DNASE1L3/HLA-E/GZMB/CTSH/HLA-H/HLA-G/NKG7/LAG3/RASGRP1/KIR2DL4/IL7R/PRF1/HLA-F/CORO1A/CD1E/SH2D1A/IL23A/PTPN6/SLAMF6	23
BP	GO:0000724	double-strand break repair via homologous recombination	26/1049	162/18800	1.07218e-06	4.38464e-05	3.65057e-05	NUCKS1/MCM8/TOP3A/XRCC2/MCMDC2/INIP/DMC1/MORF4L2/MRGBP/AUNIP/MCM7/CDC45/BLM/FEN1/POLQ/H2AX/PARP1/RMI2/CDC7/MCM6/MCM4/MCM2/MCM5/WAS/REC8/GINS2	26
BP	GO:0031334	positive regulation of protein-containing complex assembly	29/1049	194/18800	1.19135e-06	4.83564e-05	4.02608e-05	MAPK9/BRK1/NUMA1/SNCA/GNL3L/OCLN/ASAP1/PSRC1/CDT1/BAIAP2L2/TCL1A/SYK/IFNG/MSN/CXCL13/CCL21/GBP5/PLCG2/VEGFA/FES/SKAP1/PLEK/WARS1/BIN1/CCR7/BAIAP2L1/LCP1/EVL/PYCARD	29
BP	GO:0034612	response to tumor necrosis factor	34/1049	249/18800	1.2656e-06	5.09894e-05	4.24529e-05	EIF5A/TNFRSF25/KAT2A/SPPL2A/ADAM17/ZFAND6/FOXO3/TCL1A/SYK/NOL3/TNFRSF4/TNFRSF17/AIM2/CCL21/CEBPA/GBP2/IL18BP/CCL22/ZC3H12A/STAT1/VCAM1/TNFAIP3/MBP/KLF2/CYBA/BIRC3/CD40/UBD/TNFRSF14/KRT18/PYCARD/CASP1/CCL19/CCL5	34
BP	GO:0002335	mature B cell differentiation	11/1049	34/18800	1.35096e-06	5.40286e-05	4.49833e-05	LGALS1/IL10/IRF8/PLCL2/ITM2A/DOCK10/MFNG/PLCG2/POU2AF1/CD19/ADA	11
BP	GO:0001906	cell killing	28/1049	185/18800	1.40828e-06	5.59096e-05	4.65494e-05	LEP/IL18/H2BC12/LILRB1/HPRT1/SYK/DNASE1L3/IFNG/HLA-E/GZMB/CTSH/HLA-H/HLA-G/NKG7/LAG3/RASGRP1/KIR2DL4/IL7R/PRF1/HLA-F/GNLY/CORO1A/CD1E/C3/SH2D1A/IL23A/PTPN6/SLAMF6	28
BP	GO:0051304	chromosome separation	19/1049	97/18800	1.43759e-06	5.66596e-05	4.71739e-05	TOP3A/NUMA1/TACC3/DLGAP5/NDC80/PTTG1/BUB1/CDT1/KNTC1/TOP2A/FBXO5/UBE2C/CCNB1/CENPF/TRIP13/TTK/PTTG3P/CENPE/AURKB	19
BP	GO:0071356	cellular response to tumor necrosis factor	32/1049	229/18800	1.55407e-06	6.081e-05	5.06294e-05	EIF5A/TNFRSF25/KAT2A/SPPL2A/ADAM17/ZFAND6/FOXO3/TCL1A/SYK/NOL3/TNFRSF4/TNFRSF17/AIM2/CCL21/CEBPA/GBP2/IL18BP/CCL22/ZC3H12A/STAT1/VCAM1/TNFAIP3/KLF2/CYBA/BIRC3/CD40/TNFRSF14/KRT18/PYCARD/CASP1/CCL19/CCL5	32
BP	GO:2001251	negative regulation of chromosome organization	18/1049	89/18800	1.66402e-06	6.4647e-05	5.3824e-05	HNRNPU/GNL3L/NDC80/PTTG1/BUB1/CDT1/KNTC1/TOP2A/FBXO5/PARP1/CCNB1/CENPF/TRIP13/TTK/PTTG3P/AURKB/MCM2/TINF2	18
BP	GO:0050691	regulation of defense response to virus by host	12/1049	42/18800	1.98993e-06	7.67605e-05	6.39095e-05	EIF2AK4/LILRB1/APOBEC3F/IL15/APOBEC3G/AIM2/ZC3H12A/STAT1/MICB/TNFAIP3/IL23A/PYCARD	12
BP	GO:0046641	positive regulation of alpha-beta T cell proliferation	9/1049	23/18800	2.03302e-06	7.78704e-05	6.48336e-05	RIPK2/IL18/SYK/RASAL3/CCR2/HLA-E/CD3E/ZAP70/IL23A	9
BP	GO:0001768	establishment of T cell polarity	7/1049	13/18800	2.10514e-06	8.00689e-05	6.6664e-05	GSN/DOCK2/CCL21/RIPOR2/DOCK8/CCR7/CCL19	7
BP	GO:0051310	metaphase plate congression	15/1049	65/18800	2.13617e-06	8.06849e-05	6.71769e-05	HNRNPU/NUMA1/CHMP1A/CDCA5/NDC80/PSRC1/KIF2C/CDT1/KIF14/CCNB1/CENPF/CDCA8/KIFC1/CENPE/AURKB	15
BP	GO:0043370	regulation of CD4-positive, alpha-beta T cell differentiation	13/1049	50/18800	2.42512e-06	9.09669e-05	7.57375e-05	NFKBIZ/RIPK2/IL18/MYB/IFNG/SH3RF1/RUNX3/ZC3H12A/SASH3/CD83/IL4R/IL23A/CCL19	13
BP	GO:0043368	positive T cell selection	11/1049	36/18800	2.55924e-06	9.53405e-05	7.93789e-05	SPN/STAT3/DOCK2/BCL11B/CD3G/CD3D/CD3E/ZAP70/BATF/IL23A/SLAMF6	11
BP	GO:0033046	negative regulation of sister chromatid segregation	12/1049	43/18800	2.62088e-06	9.56709e-05	7.9654e-05	NDC80/PTTG1/BUB1/CDT1/KNTC1/FBXO5/CCNB1/CENPF/TRIP13/TTK/PTTG3P/AURKB	12
BP	GO:0033048	negative regulation of mitotic sister chromatid segregation	12/1049	43/18800	2.62088e-06	9.56709e-05	7.9654e-05	NDC80/PTTG1/BUB1/CDT1/KNTC1/FBXO5/CCNB1/CENPF/TRIP13/TTK/PTTG3P/AURKB	12
BP	GO:2000816	negative regulation of mitotic sister chromatid separation	12/1049	43/18800	2.62088e-06	9.56709e-05	7.9654e-05	NDC80/PTTG1/BUB1/CDT1/KNTC1/FBXO5/CCNB1/CENPF/TRIP13/TTK/PTTG3P/AURKB	12
BP	GO:0050000	chromosome localization	17/1049	83/18800	2.67943e-06	9.71561e-05	8.08905e-05	HNRNPU/NUMA1/CHMP1A/CDCA5/DLGAP5/NDC80/PSRC1/KIF2C/CDT1/KIF14/CCNB1/CENPF/CDCA8/KIFC1/CENPE/AURKB/IFFO1	17
BP	GO:0002228	natural killer cell mediated immunity	16/1049	75/18800	2.98867e-06	0.000107651	8.96288e-05	LEP/IL18/LILRB1/HLA-E/GZMB/HLA-G/NKG7/LAG3/RASGRP1/KIR2DL4/CD96/HLA-F/CORO1A/SH2D1A/PTPN6/SLAMF6	16
BP	GO:0007080	mitotic metaphase plate congression	13/1049	51/18800	3.08972e-06	0.000110559	9.20496e-05	HNRNPU/CHMP1A/CDCA5/NDC80/PSRC1/KIF2C/CDT1/KIF14/CCNB1/CDCA8/KIFC1/CENPE/AURKB	13
BP	GO:0030101	natural killer cell activation	18/1049	93/18800	3.23538e-06	0.000115014	9.57591e-05	LEP/BLOC1S6/IL18/IL21R/IL15/HLA-E/NKG7/RASGRP1/IL2RB/PIK3CD/CD2/HLA-F/CORO1A/SLAMF1/PRDM1/IL23A/FGR/ZNF683	18
BP	GO:0050853	B cell receptor signaling pathway	22/1049	131/18800	3.30438e-06	0.000116705	9.71664e-05	PLEKHA1/SYK/PLCL2/CD79B/RFTN1/LPXN/KLHL6/PLCG2/CD38/LAT2/PRKCH/PIK3CD/CD79A/BANK1/IGLL1/PRKCB/CTLA4/PTPN6/LIME1/IGKC/CD19/ITK	22
BP	GO:2000404	regulation of T cell migration	12/1049	44/18800	3.42184e-06	0.000120074	9.99713e-05	SPN/TNFSF14/ADAM17/AIRE/CCR2/CXCL13/CCL21/RIPOR2/DOCK8/TNFRSF14/PYCARD/CCL5	12
BP	GO:0002292	T cell differentiation involved in immune response	16/1049	76/18800	3.59173e-06	0.000125227	0.000104262	SPN/STAT3/CD46/NFKBIZ/RIPK2/IL18/MYB/IFNG/ZC3H12A/LEF1/IL4R/BATF/IL23A/CCL19/SLAMF6/EOMES	16
BP	GO:0002287	alpha-beta T cell activation involved in immune response	15/1049	68/18800	3.90484e-06	0.00013442	0.000111916	SPN/STAT3/NFKBIZ/RIPK2/IL18/MYB/IFNG/ZC3H12A/LEF1/IL4R/BATF/IL23A/CCL19/SLAMF6/EOMES	15
BP	GO:0002293	alpha-beta T cell differentiation involved in immune response	15/1049	68/18800	3.90484e-06	0.00013442	0.000111916	SPN/STAT3/NFKBIZ/RIPK2/IL18/MYB/IFNG/ZC3H12A/LEF1/IL4R/BATF/IL23A/CCL19/SLAMF6/EOMES	15
BP	GO:0001767	establishment of lymphocyte polarity	7/1049	14/18800	4.00697e-06	0.000137069	0.000114121	GSN/DOCK2/CCL21/RIPOR2/DOCK8/CCR7/CCL19	7
BP	GO:2000406	positive regulation of T cell migration	10/1049	31/18800	4.23704e-06	0.000144033	0.000119919	SPN/TNFSF14/ADAM17/CCR2/CXCL13/CCL21/DOCK8/TNFRSF14/PYCARD/CCL5	10
BP	GO:0051985	negative regulation of chromosome segregation	12/1049	45/18800	4.43075e-06	0.000148182	0.000123374	NDC80/PTTG1/BUB1/CDT1/KNTC1/FBXO5/CCNB1/CENPF/TRIP13/TTK/PTTG3P/AURKB	12
BP	GO:1905819	negative regulation of chromosome separation	12/1049	45/18800	4.43075e-06	0.000148182	0.000123374	NDC80/PTTG1/BUB1/CDT1/KNTC1/FBXO5/CCNB1/CENPF/TRIP13/TTK/PTTG3P/AURKB	12
BP	GO:0002312	B cell activation involved in immune response	17/1049	86/18800	4.46806e-06	0.000148182	0.000123374	LGALS1/IL10/MSH6/EXO1/UNG/IRF8/PLCL2/ITM2A/DOCK10/MFNG/PLCG2/POU2AF1/BATF/CD40/GAPT/CD19/ADA	17
BP	GO:0033627	cell adhesion mediated by integrin	17/1049	86/18800	4.46806e-06	0.000148182	0.000123374	ITGAV/ADAM17/SYK/CXCL13/CCL21/CD3E/LPXN/EFNA1/ITGB7/ITGAL/SKAP1/ITGAX/RAC3/FERMT3/PTPN6/ADA/CCL5	17
BP	GO:0032814	regulation of natural killer cell activation	11/1049	38/18800	4.62428e-06	0.000152433	0.000126913	LEP/BLOC1S6/IL18/IL15/HLA-E/RASGRP1/HLA-F/PRDM1/IL23A/FGR/ZNF683	11
BP	GO:0051056	regulation of small GTPase mediated signal transduction	37/1049	299/18800	4.72572e-06	0.000154838	0.000128916	DLC1/DENND4C/ITGAV/ARHGEF4/KITLG/NOTCH1/ARHGEF19/CADM4/RACGAP1/KIF14/STMN1/ECT2/DOCK2/ARHGAP9/RASAL3/APOE/ARHGDIB/DEF6/TGM2/ARHGAP15/P2RY10/RASGRP1/RIPOR2/DOCK8/ARHGAP25/GPR18/RHOD/ARHGAP30/FGD3/ADGRG1/SIPA1/ARHGEF3/CYTH4/CDC42SE2/P2RY8/ARHGAP4/FGD2	37
BP	GO:0019724	B cell mediated immunity	30/1049	219/18800	4.92013e-06	0.000159289	0.000132622	CD46/IL10/MSH6/EXO1/UNG/IL21R/TCIRG1/HLA-DMA/CR2/LTA/HLA-E/HLA-DPB1/CD27/SERPING1/HLA-G/HLA-DOA/INPP5D/HLA-DOB/IGLL1/HLA-DMB/C7/C3/IL4R/BATF/PTPN6/CD40/GAPT/HLA-DQB2/IGKC/CD19	30
BP	GO:0051651	maintenance of location in cell	30/1049	219/18800	4.92013e-06	0.000159289	0.000132622	KDELR3/TSPO/HNRNPU/KDELR2/GOLPH3/GSN/SNCA/DMD/GSTO1/GP1BB/CHD7/BARD1/GSTM2/ASPM/NOL3/APOE/CCL21/GPAA1/PLCG2/CYBA/CXCL11/CORO1A/CCR7/MCOLN2/CXCL9/JSRP1/PTPN6/LIME1/CCL19/CD19	30
BP	GO:0051231	spindle elongation	6/1049	10/18800	5.14655e-06	0.000165634	0.000137904	NUMA1/KIF4A/PRC1/RACGAP1/KIF23/AURKB	6
BP	GO:0051321	meiotic cell cycle	34/1049	266/18800	5.61125e-06	0.000179527	0.000149471	TOP3A/NUMA1/XRCC2/MCMDC2/CDC25B/DMC1/C11orf80/SPIRE2/TDRD1/MASTL/CKS2/MSH6/NDC80/CDC20/PTTG1/EXO1/BUB1/CDC25A/PKMYT1/FANCD2/MND1/TOP2A/FBXO5/H2AX/NEK2/CCNB2/AURKA/TRIP13/TTK/SMC4/PTTG3P/ASPM/REC8/SLC2A8	34
BP	GO:0043372	positive regulation of CD4-positive, alpha-beta T cell differentiation	10/1049	32/18800	5.85594e-06	0.00018626	0.000155077	NFKBIZ/RIPK2/IL18/MYB/IFNG/SASH3/CD83/IL4R/IL23A/CCL19	10
BP	GO:0007091	metaphase/anaphase transition of mitotic cell cycle	14/1049	62/18800	6.10638e-06	0.000193097	0.000160769	TACC3/DLGAP5/NDC80/BUB1/CDT1/KNTC1/FBXO5/UBE2C/CCNB1/CENPF/TRIP13/TTK/CENPE/AURKB	14
BP	GO:0006968	cellular defense response	13/1049	54/18800	6.15072e-06	0.000193374	0.000161	SPN/ZNF148/TCIRG1/CCR2/HLA-G/KIR2DL4/PRF1/KLRG1/FCMR/GNLY/CXCL9/SH2D1A/ITK	13
BP	GO:0002577	regulation of antigen processing and presentation	8/1049	20/18800	6.30957e-06	0.000197228	0.000164209	WAS/TAPBPL/CCL21/HLA-DOA/HLA-DOB/CCR7/PYCARD/CCL19	8
BP	GO:0043254	regulation of protein-containing complex assembly	45/1049	401/18800	6.52754e-06	0.000202876	0.000168911	RALB/ULK1/MAPK9/LMOD3/BRK1/GSN/NUMA1/SNCA/SPTBN1/GNL3L/OCLN/SAR1B/ASAP1/PSRC1/CDT1/KIF14/HJURP/STMN1/PARP1/BAIAP2L2/TCL1A/SYK/IFNG/MSN/APOE/CXCL13/HCLS1/CCL21/GBP5/IKBKE/PLCG2/VEGFA/FES/SKAP1/SOX9/PLEK/WARS1/BIN1/CORO1A/CCR7/BAIAP2L1/CYFIP2/LCP1/EVL/PYCARD	45
BP	GO:0042832	defense response to protozoan	9/1049	26/18800	6.67668e-06	0.000206332	0.000171789	IL10/IRF8/TSPAN32/GBP2/GBP4/NKG7/IL4R/BATF/CD40	9
BP	GO:0007346	regulation of mitotic cell cycle	51/1049	478/18800	6.86219e-06	0.000210867	0.000175564	HNRNPU/CDK10/CRADD/PIM3/PRMT2/IL10/CDC25B/INIP/ADAM17/RPS27L/CDCA5/DLGAP5/PRKDC/CKS2/NDC80/NUSAP1/BUB1/BLM/CDC25A/PKMYT1/CDT1/FANCD2/KIF14/RRM1/CDCA2/KNTC1/FBXO5/UBE2C/E2F7/CCNB1/NEK2/CENPF/CDC7/AURKA/TRIP13/TTK/KIF20B/CENPE/STIL/ANLN/AURKB/PSME1/PSME2/BTG2/CTDSPL/BRSK1/CCND2/EIF4EBP1/PIM2/PTPN6/UBD	51
BP	GO:0002707	negative regulation of lymphocyte mediated immunity	13/1049	55/18800	7.6466e-06	0.000233651	0.000194534	DUSP22/CD46/AHR/LILRB1/CR2/HLA-E/HLA-G/KIR2DL4/IL7R/CD96/HLA-F/SLAMF1/PTPN6	13
BP	GO:0007143	female meiotic nuclear division	10/1049	33/18800	7.98364e-06	0.000242587	0.000201974	CDC25B/SPIRE2/MASTL/NDC80/TOP2A/FBXO5/CCNB2/AURKA/TRIP13/TTK	10
BP	GO:0042267	natural killer cell mediated cytotoxicity	15/1049	72/18800	8.24749e-06	0.000249212	0.000207489	LEP/IL18/LILRB1/HLA-E/GZMB/HLA-G/NKG7/LAG3/RASGRP1/KIR2DL4/HLA-F/CORO1A/SH2D1A/PTPN6/SLAMF6	15
BP	GO:0051303	establishment of chromosome localization	16/1049	81/18800	8.56709e-06	0.00025673	0.000213749	HNRNPU/NUMA1/CHMP1A/CDCA5/DLGAP5/NDC80/PSRC1/KIF2C/CDT1/KIF14/CCNB1/CENPF/CDCA8/KIFC1/CENPE/AURKB	16
BP	GO:0051235	maintenance of location	39/1049	331/18800	8.59072e-06	0.00025673	0.000213749	KDELR3/LEP/TSPO/HNRNPU/KDELR2/GOLPH3/GSN/ITGAV/IL10/SNCA/DMD/GSTO1/GP1BB/CHD7/BARD1/GSTM2/ASPM/NOL3/APOE/CCL21/PLA2G4C/IKBKE/GPAA1/PLCG2/ZC3H12A/NR1H3/CYBA/GM2A/CXCL11/CORO1A/CCR7/MCOLN2/C3/CXCL9/JSRP1/PTPN6/LIME1/CCL19/CD19	39
BP	GO:0065004	protein-DNA complex assembly	28/1049	203/18800	8.83299e-06	0.000262528	0.000218577	H2BC8/H3C10/H4C8/KAT6A/H2BC12/DMC1/TAF1C/SMARCA4/GTF2H5/DLGAP5/CENPW/CENPV/CDC45/CENPA/CDT1/HJURP/KNTC1/H4C3/CENPN/H2AX/NASP/CHAF1B/CENPF/CENPE/MCM2/OIP5/BRF2/SOX9	28
BP	GO:0033628	regulation of cell adhesion mediated by integrin	12/1049	48/18800	9.19029e-06	0.000271663	0.000226182	SYK/CXCL13/CCL21/CD3E/LPXN/EFNA1/SKAP1/RAC3/FERMT3/PTPN6/ADA/CCL5	12
BP	GO:0031341	regulation of cell killing	18/1049	100/18800	9.41266e-06	0.000276732	0.000230403	LEP/LILRB1/SYK/DNASE1L3/IFNG/HLA-E/HLA-H/HLA-G/LAG3/RASGRP1/KIR2DL4/IL7R/PRF1/HLA-F/CD1E/SH2D1A/IL23A/SLAMF6	18
BP	GO:0001562	response to protozoan	9/1049	27/18800	9.52054e-06	0.000278399	0.00023179	IL10/IRF8/TSPAN32/GBP2/GBP4/NKG7/IL4R/BATF/CD40	9
BP	GO:0033630	positive regulation of cell adhesion mediated by integrin	8/1049	21/18800	9.69429e-06	0.000281964	0.000234759	SYK/CXCL13/CCL21/CD3E/SKAP1/RAC3/PTPN6/CCL5	8
BP	GO:0006302	double-strand break repair	34/1049	273/18800	9.88292e-06	0.000285921	0.000238053	NUCKS1/TDP1/MCM8/TOP3A/XRCC2/MCMDC2/INIP/DMC1/SPIRE2/MORF4L2/DCLRE1C/MRGBP/CDCA5/AUNIP/PRKDC/MCM7/CDC45/BLM/FANCD2/FEN1/POLQ/H2AX/PARP1/RMI2/CDC7/MCM6/TRIP13/MCM4/MCM2/MCM5/WAS/REC8/GINS2/IFFO1	34
BP	GO:1901990	regulation of mitotic cell cycle phase transition	38/1049	321/18800	1.00166e-05	0.000288255	0.000239996	CDK10/CRADD/PRMT2/CDC25B/INIP/ADAM17/RPS27L/CDCA5/DLGAP5/PRKDC/NDC80/BUB1/BLM/CDC25A/CDT1/KIF14/RRM1/KNTC1/FBXO5/UBE2C/E2F7/CCNB1/CENPF/CDC7/AURKA/TRIP13/TTK/CENPE/STIL/ANLN/AURKB/PSME1/PSME2/CTDSPL/BRSK1/CCND2/PTPN6/UBD	38
BP	GO:0051250	negative regulation of lymphocyte activation	24/1049	161/18800	1.01788e-05	0.000291382	0.0002426	SPN/DUSP22/IL10/PLA2G2D/LILRB1/IDO1/LAX1/TNFRSF13B/RUNX3/HLA-G/ZC3H12A/LAG3/INPP5D/TNFAIP3/RIPOR2/BANK1/TBC1D10C/HLA-F/IL4R/IRF1/CTLA4/PTPN6/TNFRSF14/FGR	24
BP	GO:0016064	immunoglobulin mediated immune response	29/1049	216/18800	1.04476e-05	0.000297512	0.000247703	CD46/IL10/MSH6/EXO1/UNG/IL21R/TCIRG1/HLA-DMA/CR2/LTA/HLA-E/HLA-DPB1/CD27/SERPING1/HLA-DOA/INPP5D/HLA-DOB/IGLL1/HLA-DMB/C7/C3/IL4R/BATF/PTPN6/CD40/GAPT/HLA-DQB2/IGKC/CD19	29
BP	GO:0008360	regulation of cell shape	23/1049	151/18800	1.07838e-05	0.000303964	0.000253075	TPM1/DLC1/SEMA3E/RND3/STRIP2/PLXNB1/COCH/RAC2/BAMBI/FYN/MSN/ARHGAP15/VEGFA/FES/RHOD/SEMA4D/FGD3/CORO1A/RAC3/SHROOM3/FGR/CDC42SE2/FGD2	23
BP	GO:0033632	regulation of cell-cell adhesion mediated by integrin	6/1049	11/18800	1.0786e-05	0.000303964	0.000253075	CXCL13/CD3E/SKAP1/FERMT3/ADA/CCL5	6
BP	GO:0044784	metaphase/anaphase transition of cell cycle	14/1049	65/18800	1.09524e-05	0.000307061	0.000255654	TACC3/DLGAP5/NDC80/BUB1/CDT1/KNTC1/FBXO5/UBE2C/CCNB1/CENPF/TRIP13/TTK/CENPE/AURKB	14
BP	GO:0051209	release of sequestered calcium ion into cytosol	20/1049	121/18800	1.16492e-05	0.000324922	0.000270525	SNCA/DMD/GSTO1/GP1BB/CHD7/GSTM2/NOL3/CCL21/PLCG2/CYBA/CXCL11/CORO1A/CCR7/MCOLN2/CXCL9/JSRP1/PTPN6/LIME1/CCL19/CD19	20
BP	GO:0002698	negative regulation of immune effector process	19/1049	112/18800	1.30578e-05	0.000362353	0.000301689	DUSP22/GRN/CD46/IL10/AHR/LILRB1/CCR2/CR2/HLA-E/SERPING1/HLA-G/ZC3H12A/KIR2DL4/IL7R/CD96/HLA-F/SLAMF1/IL4R/PTPN6	19
BP	GO:0051283	negative regulation of sequestering of calcium ion	20/1049	122/18800	1.32145e-05	0.00036484	0.00030376	SNCA/DMD/GSTO1/GP1BB/CHD7/GSTM2/NOL3/CCL21/PLCG2/CYBA/CXCL11/CORO1A/CCR7/MCOLN2/CXCL9/JSRP1/PTPN6/LIME1/CCL19/CD19	20
BP	GO:0006268	DNA unwinding involved in DNA replication	8/1049	22/18800	1.44899e-05	0.000398034	0.000331397	MCM7/CDC45/BLM/MCM6/MCM4/MCM2/MCM5/GINS2	8
BP	GO:0018212	peptidyl-tyrosine modification	42/1049	376/18800	1.47138e-05	0.000402153	0.000334826	HIPK2/DUSP22/LEP/TNK2/DYRK2/KITLG/RIPK2/IL18/ADAM17/CADM4/MELK/PBK/LRP8/TTK/SYK/FYN/IFNG/ENPP2/IL15/EPHB4/HCLS1/CD3E/PLCG2/VEGFA/MVP/DDR1/EFNA1/BANK1/FES/ZAP70/SEMA4D/MATK/TPST2/CSPG4/IL23A/PTPN6/CD40/TNFRSF14/FGR/GHRL/ITK/CCL5	42
BP	GO:0002832	negative regulation of response to biotic stimulus	19/1049	113/18800	1.48889e-05	0.000404903	0.000337115	ATG12/GRN/TRIB1/AHR/PPM1B/LILRB1/STAT2/RNF125/HLA-E/SERPING1/HLA-G/TSPAN6/KIR2DL4/MICB/TNFAIP3/NR1H3/IFI16/CD96/HLA-F	19
BP	GO:0097553	calcium ion transmembrane import into cytosol	23/1049	154/18800	1.49861e-05	0.000405521	0.00033763	SNCA/DMD/GSTO1/GP1BB/CHD7/GSTM2/NOL3/FYN/CCL21/PLCG2/RAMP3/CYBA/TRPV2/CXCL11/CORO1A/CCR7/MCOLN2/CXCL9/JSRP1/PTPN6/LIME1/CCL19/CD19	23
BP	GO:0043087	regulation of GTPase activity	41/1049	364/18800	1.52062e-05	0.000409437	0.000340891	GPR137B/RGS10/SGSM2/TBC1D15/EVI5/ARHGEF19/GPSM1/PLXNB1/ASAP1/STMN1/ECT2/ARHGAP9/GRTP1/RASAL3/ADAP1/DVL3/CXCL13/CCL21/TGM2/ARHGAP15/DOCK10/RAPGEFL1/CCL22/RASGRP1/RGL1/RIPOR2/DOCK8/ARHGAP25/SEMA4D/SH3BP4/TBC1D10C/BIN1/FGD3/CCR7/SIPA1/CD40/RASGRP2/PYCARD/CCL19/FGD2/CCL5	41
BP	GO:0002294	CD4-positive, alpha-beta T cell differentiation involved in immune response	14/1049	67/18800	1.5833e-05	0.000422137	0.000351464	SPN/STAT3/NFKBIZ/RIPK2/IL18/MYB/IFNG/ZC3H12A/LEF1/IL4R/BATF/IL23A/CCL19/SLAMF6	14
BP	GO:0002704	negative regulation of leukocyte mediated immunity	14/1049	67/18800	1.5833e-05	0.000422137	0.000351464	DUSP22/CD46/AHR/LILRB1/CCR2/CR2/HLA-E/HLA-G/KIR2DL4/IL7R/CD96/HLA-F/SLAMF1/PTPN6	14
BP	GO:0051282	regulation of sequestering of calcium ion	20/1049	124/18800	1.69242e-05	0.000449027	0.000373853	SNCA/DMD/GSTO1/GP1BB/CHD7/GSTM2/NOL3/CCL21/PLCG2/CYBA/CXCL11/CORO1A/CCR7/MCOLN2/CXCL9/JSRP1/PTPN6/LIME1/CCL19/CD19	20
BP	GO:0002820	negative regulation of adaptive immune response	13/1049	59/18800	1.73264e-05	0.000457468	0.00038088	DUSP22/CD46/AHR/LILRB1/CR2/HLA-G/ZC3H12A/IL7R/HLA-F/SLAMF1/IL4R/PTPN6/TNFRSF14	13
BP	GO:0050729	positive regulation of inflammatory response	22/1049	145/18800	1.77255e-05	0.000465745	0.000387771	LGALS1/GRN/NFKBIZ/PDCD4/IL18/SNCA/IDO1/CCR2/IFNG/IL15/LTA/HLA-E/CEBPA/NKG7/PLCG2/NUPR1/CCR7/C3/IL23A/GPSM3/PYCARD/CASP1	22
BP	GO:0002313	mature B cell differentiation involved in immune response	9/1049	29/18800	1.83862e-05	0.000478481	0.000398376	LGALS1/IL10/IRF8/ITM2A/DOCK10/MFNG/PLCG2/POU2AF1/ADA	9
BP	GO:0002474	antigen processing and presentation of peptide antigen via MHC class I	9/1049	29/18800	1.83862e-05	0.000478481	0.000398376	SAR1B/TAPBPL/HLA-E/HLA-H/HLA-G/ERAP2/TAP2/HLA-F/TAP1	9
BP	GO:0045066	regulatory T cell differentiation	10/1049	36/18800	1.88125e-05	0.000487243	0.00040567	CD46/KAT2A/PLA2G2D/FOXO3/FANCD2/IFNG/HLA-G/LAG3/IRF1/CTLA4	10
BP	GO:0002821	positive regulation of adaptive immune response	19/1049	115/18800	1.9256e-05	0.000496368	0.000413268	NFKBIZ/RIPK2/IL18/EIF2AK4/CCR2/LTA/HLA-E/HLA-H/HLA-G/SKAP1/SASH3/HLA-F/CD1E/C3/SLAMF1/IL23A/CD40/PYCARD/ADA	19
BP	GO:0002544	chronic inflammatory response	7/1049	17/18800	1.9578e-05	0.000499928	0.000416232	IL10/IDO1/LTA/CXCL13/VCAM1/TNFAIP3/CCL5	7
BP	GO:0019885	antigen processing and presentation of endogenous peptide antigen via MHC class I	7/1049	17/18800	1.9578e-05	0.000499928	0.000416232	HLA-E/HLA-H/HLA-G/ERAP2/TAP2/HLA-F/TAP1	7
BP	GO:0010639	negative regulation of organelle organization	40/1049	356/18800	2.03819e-05	0.000518025	0.000431299	RBM14/DLC1/TSPO/HNRNPU/CDK10/LMOD3/TIGAR/GSN/MAP6D1/TMEM14A/KAT2A/SNCA/SPTBN1/TJP1/GNL3L/SLC25A4/NDC80/PTTG1/BUB1/CDT1/KNTC1/STMN1/TOP2A/FBXO5/PARP1/CCNB1/CENPF/TRIP13/TTK/PTTG3P/TPX2/AURKB/MCM2/WAS/NOL3/TINF2/GMFG/NUPR1/CORO1A/BNIP3	40
BP	GO:0050727	regulation of inflammatory response	43/1049	394/18800	2.06438e-05	0.00052224	0.000434808	LGALS1/GRN/NFKBIZ/PDCD4/IL10/SHPK/IL18/SNCA/PLA2G2D/SELENOS/FANCD2/PBK/IL37/SYK/DNASE1L3/IDO1/CCR2/FYN/IFNG/APOE/IL15/LTA/HLA-E/CEBPA/NKG7/PLCG2/AKNA/TNFAIP3/NR1H3/NUPR1/CST7/BIRC3/CCR7/C3/SYT11/IL23A/GPSM3/FGR/PYCARD/CASP1/ADA/GHRL/CCL5	43
BP	GO:0030071	regulation of mitotic metaphase/anaphase transition	13/1049	60/18800	2.10004e-05	0.000528803	0.000440272	DLGAP5/NDC80/BUB1/CDT1/KNTC1/FBXO5/UBE2C/CCNB1/CENPF/TRIP13/TTK/CENPE/AURKB	13
BP	GO:0090307	mitotic spindle assembly	14/1049	69/18800	2.25377e-05	0.000564898	0.000470324	HNRNPU/BCCIP/CHMP1A/KIF11/KIF4A/CDC20/PRC1/RACGAP1/KIF23/NEK2/KIFC1/KIF15/TPX2/AURKB	14
BP	GO:0008608	attachment of spindle microtubules to kinetochore	10/1049	37/18800	2.44988e-05	0.000608444	0.00050658	HNRNPU/NDC80/KIF2C/RACGAP1/CDT1/CCNB1/NEK2/CENPE/AURKB/ECT2	10
BP	GO:2000403	positive regulation of lymphocyte migration	10/1049	37/18800	2.44988e-05	0.000608444	0.00050658	SPN/TNFSF14/ADAM17/CCR2/CXCL13/CCL21/DOCK8/TNFRSF14/PYCARD/CCL5	10
BP	GO:0018108	peptidyl-tyrosine phosphorylation	41/1049	373/18800	2.7035e-05	0.00066838	0.000556482	HIPK2/DUSP22/LEP/TNK2/DYRK2/KITLG/RIPK2/IL18/ADAM17/CADM4/MELK/PBK/LRP8/TTK/SYK/FYN/IFNG/ENPP2/IL15/EPHB4/HCLS1/CD3E/PLCG2/VEGFA/MVP/DDR1/EFNA1/BANK1/FES/ZAP70/SEMA4D/MATK/CSPG4/IL23A/PTPN6/CD40/TNFRSF14/FGR/GHRL/ITK/CCL5	41
BP	GO:0051208	sequestering of calcium ion	20/1049	128/18800	2.72614e-05	0.000670927	0.000558603	SNCA/DMD/GSTO1/GP1BB/CHD7/GSTM2/NOL3/CCL21/PLCG2/CYBA/CXCL11/CORO1A/CCR7/MCOLN2/CXCL9/JSRP1/PTPN6/LIME1/CCL19/CD19	20
BP	GO:0052548	regulation of endopeptidase activity	45/1049	426/18800	3.01366e-05	0.000738348	0.000614736	LXN/TNFSF14/DLC1/CSTB/CRADD/STAT3/GSN/USP14/TNFSF15/RIPK2/SNCA/RPS27L/PLAUR/CST6/BIRC5/PTTG1/SYK/PSME1/NOL3/FYN/PSME2/TNFSF10/CD27/AIM2/SH3RF1/CTSH/SERPING1/VEGFA/ATP2A3/SERPINF2/EFNA1/MBP/SPOCK2/IFI16/CST7/BIRC3/BIN1/PAPLN/C3/RENBP/SPINT1/CYFIP2/SERPINB5/PYCARD/CASP1	45
BP	GO:0051382	kinetochore assembly	7/1049	18/18800	3.04948e-05	0.000743772	0.000619253	DLGAP5/CENPW/CENPA/KNTC1/CENPN/CENPF/CENPE	7
BP	GO:0000281	mitotic cytokinesis	14/1049	71/18800	3.1621e-05	0.000767798	0.000639256	SPTBN1/CHMP1A/KIF20A/KIF4A/NUSAP1/RACGAP1/CENPA/STMN1/KIF23/KIF20B/ANLN/ECT2/CEP55/SEPTIN6	14
BP	GO:0045089	positive regulation of innate immune response	21/1049	140/18800	3.25135e-05	0.00078596	0.000654377	RBM14/PRKDC/COCH/SYK/FYN/HLA-E/AIM2/GBP5/HLA-G/IKBKE/PLCG2/LAG3/RASGRP1/KIR2DL4/IFI16/HLA-F/SH2D1A/PYCARD/SLAMF6/PYHIN1/CCL5	21
BP	GO:0002823	negative regulation of adaptive immune response based on somatic recombination of immune receptors built from immunoglobulin superfamily domains	12/1049	54/18800	3.31919e-05	0.000798809	0.000665075	DUSP22/CD46/AHR/LILRB1/CR2/HLA-G/ZC3H12A/IL7R/HLA-F/SLAMF1/IL4R/PTPN6	12
BP	GO:0002230	positive regulation of defense response to virus by host	9/1049	31/18800	3.34536e-05	0.00080156	0.000667366	EIF2AK4/LILRB1/APOBEC3F/APOBEC3G/AIM2/ZC3H12A/STAT1/IL23A/PYCARD	9
BP	GO:1901987	regulation of cell cycle phase transition	44/1049	415/18800	3.3684e-05	0.000803541	0.000669015	CDK10/CRADD/PRMT2/CDC25B/EIF2AK4/INIP/ADAM17/RPS27L/CDCA5/DLGAP5/PRKDC/NDC80/BUB1/CDC45/BLM/CDC25A/CDT1/FANCD2/KIF14/RRM1/KNTC1/FBXO5/H2AX/UBE2C/E2F7/CCNB1/CENPF/CDC7/AURKA/TRIP13/TTK/CENPE/STIL/ANLN/AURKB/PSME1/PSME2/CTDSPL/BRSK1/PLCG2/CCND2/FBXO6/PTPN6/UBD	44
BP	GO:0007144	female meiosis I	6/1049	13/18800	3.63618e-05	0.000853805	0.000710864	CDC25B/NDC80/FBXO5/CCNB2/AURKA/TRIP13	6
BP	GO:0051988	regulation of attachment of spindle microtubules to kinetochore	6/1049	13/18800	3.63618e-05	0.000853805	0.000710864	HNRNPU/RACGAP1/CCNB1/NEK2/AURKB/ECT2	6
BP	GO:1902099	regulation of metaphase/anaphase transition of cell cycle	13/1049	63/18800	3.6419e-05	0.000853805	0.000710864	DLGAP5/NDC80/BUB1/CDT1/KNTC1/FBXO5/UBE2C/CCNB1/CENPF/TRIP13/TTK/CENPE/AURKB	13
BP	GO:2000401	regulation of lymphocyte migration	13/1049	63/18800	3.6419e-05	0.000853805	0.000710864	SPN/TNFSF14/ADAM17/AIRE/CCR2/MSN/CXCL13/CCL21/RIPOR2/DOCK8/TNFRSF14/PYCARD/CCL5	13
BP	GO:2000516	positive regulation of CD4-positive, alpha-beta T cell activation	10/1049	39/18800	4.03827e-05	0.000942669	0.00078485	NFKBIZ/RIPK2/IL18/MYB/IFNG/SASH3/CD83/IL4R/IL23A/CCL19	10
BP	GO:0007254	JNK cascade	24/1049	175/18800	4.15714e-05	0.000966269	0.000804499	HIPK2/DUSP22/ZMYND11/MAPK9/FKTN/PDCD4/RIPK2/TRIB1/DUSP19/MAPK8IP3/SH2D3C/ARHGEF6/CD27/CCL21/SH3RF1/MARVELD3/RASGRP1/SERPINF2/MAP4K1/RASSF2/CCR7/SLAMF1/PYCARD/CCL19	24
BP	GO:0019884	antigen processing and presentation of exogenous antigen	11/1049	47/18800	4.2159e-05	0.000975757	0.000812399	PSME1/HLA-DMA/HLA-E/HLA-DPB1/HLA-DOA/HLA-DOB/HLA-DMB/HLA-F/CD1E/HLA-DQB2/TAP1	11
BP	GO:0035456	response to interferon-beta	9/1049	32/18800	4.42527e-05	0.00101987	0.000849131	IFNAR2/UBE2G2/PNPT1/AIM2/IKBKE/STAT1/IFI16/IRF1/PYHIN1	9
BP	GO:0002483	antigen processing and presentation of endogenous peptide antigen	7/1049	19/18800	4.59616e-05	0.00105479	0.000878199	HLA-E/HLA-H/HLA-G/ERAP2/TAP2/HLA-F/TAP1	7
BP	GO:0045862	positive regulation of proteolysis	40/1049	369/18800	4.61977e-05	0.00105575	0.000879003	DLC1/CSNK1E/MAPK9/GRN/CRADD/STAT3/GSN/TNFSF15/CCBE1/RIPK2/TRIB1/SNCA/RPS27L/PACSIN3/RNF19A/CDC20/AURKA/USP13/SYK/PSME1/FYN/IFNG/APOE/PSME2/TNFSF10/AIM2/SH3RF1/CEBPA/CTSH/ZC3H12A/ATP2A3/EFNA1/MBP/IFI16/NUPR1/CYFIP2/ENO1/PYCARD/CASP1/PYHIN1	40
BP	GO:0044839	cell cycle G2/M phase transition	22/1049	155/18800	5.0664e-05	0.00115282	0.000959821	CDC25B/INIP/AKAP8L/MASTL/MELK/NDC80/SKP2/BLM/CDC25A/PKMYT1/CCNA2/KIF14/RRM1/FBXO5/CCNB1/CENPF/CDC7/CCNB2/AURKA/AURKB/BRSK1/CCNY	22
BP	GO:0045841	negative regulation of mitotic metaphase/anaphase transition	10/1049	40/18800	5.11718e-05	0.00115282	0.000959821	NDC80/BUB1/CDT1/KNTC1/FBXO5/CCNB1/CENPF/TRIP13/TTK/AURKB	10
BP	GO:0031343	positive regulation of cell killing	13/1049	65/18800	5.1505e-05	0.00115282	0.000959821	SYK/IFNG/HLA-E/HLA-H/HLA-G/LAG3/RASGRP1/PRF1/HLA-F/CD1E/SH2D1A/IL23A/SLAMF6	13
BP	GO:0042093	T-helper cell differentiation	13/1049	65/18800	5.1505e-05	0.00115282	0.000959821	SPN/STAT3/NFKBIZ/RIPK2/IL18/MYB/ZC3H12A/LEF1/IL4R/BATF/IL23A/CCL19/SLAMF6	13
BP	GO:0045576	mast cell activation	13/1049	65/18800	5.1505e-05	0.00115282	0.000959821	RAC2/SYK/LAT/NDRG1/PTGDS/RASGRP1/LAT2/PIK3CD/FES/CD300LF/IL4R/PTPN6/FGR	13
BP	GO:0090068	positive regulation of cell cycle process	30/1049	247/18800	5.18924e-05	0.00115673	0.000963077	HNRNPU/CDK10/NUMA1/CDC25B/ADAM17/CDCA5/DLGAP5/CENPV/NDC80/NUSAP1/RACGAP1/CDC25A/CDT1/KIF14/RRM1/FEN1/FBXO5/KIF23/UBE2C/E2F7/CCNB1/CDC7/AURKA/KIF20B/STIL/AURKB/ECT2/PLCG2/CCND2/CXCR5	30
BP	GO:0032760	positive regulation of tumor necrosis factor production	17/1049	103/18800	5.27466e-05	0.00116621	0.00097097	SPN/LEP/STAT3/RIPK2/SYK/CCR2/IFNG/HLA-E/PLCG2/RASGRP1/CYBA/CD2/SASH3/IL23A/SPON2/PYCARD/CCL19	17
BP	GO:0071103	DNA conformation change	17/1049	103/18800	5.27466e-05	0.00116621	0.00097097	CHD8/CHTF18/MCM8/TOP3A/MCMDC2/HNRNPA2B1/MCM7/CHD7/CDC45/BLM/TOP2A/POLQ/MCM6/MCM4/MCM2/MCM5/GINS2	17
BP	GO:0070304	positive regulation of stress-activated protein kinase signaling cascade	20/1049	134/18800	5.34238e-05	0.00117641	0.000979455	HIPK2/RNF13/DUSP22/LEP/RIPK2/DUSP19/MAPK8IP3/SASH1/CD27/CCL21/SH3RF1/ZC3H12A/VEGFA/RASGRP1/SERPINF2/RASSF2/CCR7/SLAMF1/PYCARD/CCL19	20
BP	GO:0071900	regulation of protein serine/threonine kinase activity	40/1049	372/18800	5.53559e-05	0.00121403	0.00101078	RALB/BCCIP/PDCD4/MST1/KITLG/TRIB1/DUSP19/ADAM17/SNCA/SASH1/DRD4/CKS2/PSRC1/GTPBP4/BLM/CDC25A/PKMYT1/CCNA2/CCNB1/CCNB2/TCL1A/SYK/LAX1/IFNG/APOE/DVL3/CEBPA/VEGFA/RASGRP1/TNFAIP3/CCND2/CCNY/CDK12/PTPN6/LIME1/CD40/PYCARD/CCL19/FGD2/ADRB2	40
BP	GO:0045589	regulation of regulatory T cell differentiation	9/1049	33/18800	5.78536e-05	0.00125605	0.00104577	CD46/KAT2A/FOXO3/FANCD2/IFNG/HLA-G/LAG3/IRF1/CTLA4	9
BP	GO:0070229	negative regulation of lymphocyte apoptotic process	9/1049	33/18800	5.78536e-05	0.00125605	0.00104577	AURKB/IDO1/CD27/DOCK8/EFNA1/IL7R/HSH2D/ADA/CCL5	9
BP	GO:0019883	antigen processing and presentation of endogenous antigen	8/1049	26/18800	5.79646e-05	0.00125605	0.00104577	HLA-E/HLA-H/HLA-G/ERAP2/TAP2/HLA-F/CD1E/TAP1	8
BP	GO:0050731	positive regulation of peptidyl-tyrosine phosphorylation	25/1049	190/18800	5.82781e-05	0.00125784	0.00104725	LEP/TNK2/KITLG/RIPK2/IL18/ADAM17/LRP8/SYK/FYN/IFNG/ENPP2/IL15/HCLS1/CD3E/PLCG2/VEGFA/EFNA1/BANK1/SEMA4D/CSPG4/IL23A/CD40/TNFRSF14/GHRL/CCL5	25
BP	GO:0070228	regulation of lymphocyte apoptotic process	12/1049	57/18800	5.86354e-05	0.00126054	0.00104951	IL10/AURKB/IDO1/CD3G/GIMAP8/CD27/DOCK8/EFNA1/IL7R/HSH2D/ADA/CCL5	12
BP	GO:0002437	inflammatory response to antigenic stimulus	14/1049	75/18800	5.98123e-05	0.00128078	0.00106636	IL10/NOTCH1/PLA2G2D/SELENOS/IL37/SYK/FYN/LTA/HLA-E/RASGRP1/CCR7/C3/CD6/FGR	14
BP	GO:0001787	natural killer cell proliferation	6/1049	14/18800	6.0628e-05	0.00128811	0.00107246	LEP/IL18/IL15/HLA-E/SLAMF1/IL23A	6
BP	GO:0002475	antigen processing and presentation via MHC class Ib	6/1049	14/18800	6.0628e-05	0.00128811	0.00107246	HLA-E/HLA-H/HLA-G/TAP2/HLA-F/CD1E	6
BP	GO:2000514	regulation of CD4-positive, alpha-beta T cell activation	13/1049	66/18800	6.09019e-05	0.00128889	0.00107311	NFKBIZ/RIPK2/IL18/MYB/IFNG/SH3RF1/RUNX3/ZC3H12A/SASH3/CD83/IL4R/IL23A/CCL19	13
BP	GO:0010506	regulation of autophagy	37/1049	336/18800	6.31795e-05	0.00133191	0.00110893	SOGA1/SPTLC1/LEP/RALB/TRIM13/TSPO/GPR137B/ATG12/ULK1/STAT3/ATP6V0E1/TIGAR/IL10/RIPK2/SNCA/FOXO3/SLC25A4/GPSM1/ATP6V0D1/FOXK1/USP36/WASHC1/USP13/IFNG/BAG3/ZC3H12A/FBXL2/IFI16/NUPR1/IL10RA/SH3BP4/TP53INP1/PIP4K2A/PIM2/BNIP3/PYCARD/ADRB2	37
BP	GO:0001910	regulation of leukocyte mediated cytotoxicity	15/1049	85/18800	6.50709e-05	0.00136649	0.00113772	LEP/LILRB1/DNASE1L3/HLA-E/HLA-H/HLA-G/LAG3/RASGRP1/KIR2DL4/IL7R/HLA-F/CD1E/SH2D1A/IL23A/SLAMF6	15
BP	GO:0002833	positive regulation of response to biotic stimulus	24/1049	180/18800	6.57386e-05	0.0013752	0.00114497	RBM14/GRN/SASH1/PRKDC/COCH/SYK/FYN/HLA-E/AIM2/GBP5/HLA-G/IKBKE/PLCG2/LAG3/RASGRP1/KIR2DL4/IFI16/CYBA/HLA-F/SH2D1A/PYCARD/SLAMF6/PYHIN1/CCL5	24
BP	GO:0002396	MHC protein complex assembly	7/1049	20/18800	6.73126e-05	0.00139207	0.00115901	HLA-DMA/TAPBPL/HLA-DPB1/HLA-DOA/HLA-DOB/HLA-DMB/HLA-DQB2	7
BP	GO:0002501	peptide antigen assembly with MHC protein complex	7/1049	20/18800	6.73126e-05	0.00139207	0.00115901	HLA-DMA/TAPBPL/HLA-DPB1/HLA-DOA/HLA-DOB/HLA-DMB/HLA-DQB2	7
BP	GO:0070233	negative regulation of T cell apoptotic process	7/1049	20/18800	6.73126e-05	0.00139207	0.00115901	IDO1/CD27/DOCK8/EFNA1/IL7R/ADA/CCL5	7
BP	GO:0002440	production of molecular mediator of immune response	35/1049	312/18800	6.79211e-05	0.00139933	0.00116506	DNAJB9/IL10/IL18/LILRB1/SLC7A5/PRKDC/MSH6/EXO1/POLQ/UNG/HLA-DMA/CCR2/TNFRSF4/MZB1/HLA-E/HLA-DPB1/HLA-G/HLA-DOA/PLCG2/KIR2DL4/HLA-DOB/CD96/VPREB3/SASH3/HLA-DMB/HLA-F/SLAMF1/IL4R/BATF/CD40/SPON2/GAPT/TNFRSF14/HLA-DQB2/IGKC	35
BP	GO:0043299	leukocyte degranulation	14/1049	76/18800	6.96045e-05	0.0014286	0.00118943	RAC2/SYK/LAT/CCR2/PTGDS/NKG7/RASGRP1/LAT2/PIK3CD/FES/HLA-F/CORO1A/IL4R/FGR	14
BP	GO:0031098	stress-activated protein kinase signaling cascade	30/1049	252/18800	7.52556e-05	0.00153878	0.00128116	HIPK2/RNF13/DUSP22/LEP/ZMYND11/MAPK9/FKTN/PDCD4/RIPK2/TRIB1/DUSP19/MAPK8IP3/SASH1/PBK/SH2D3C/ARHGEF6/CD27/CCL21/SH3RF1/MARVELD3/ZC3H12A/VEGFA/RASGRP1/SERPINF2/MAP4K1/RASSF2/CCR7/SLAMF1/PYCARD/CCL19	30
BP	GO:0052547	regulation of peptidase activity	46/1049	456/18800	7.61949e-05	0.00155215	0.00129229	LXN/TNFSF14/DLC1/CSTB/GRN/CRADD/STAT3/GSN/USP14/TNFSF15/RIPK2/SNCA/RPS27L/PLAUR/CST6/BIRC5/PTTG1/SYK/PSME1/NOL3/FYN/PSME2/TNFSF10/CD27/AIM2/SH3RF1/CTSH/SERPING1/VEGFA/ATP2A3/SERPINF2/EFNA1/MBP/SPOCK2/IFI16/CST7/BIRC3/BIN1/PAPLN/C3/RENBP/SPINT1/CYFIP2/SERPINB5/PYCARD/CASP1	46
BP	GO:0032392	DNA geometric change	16/1049	96/18800	7.69327e-05	0.00156133	0.00129994	CHD8/CHTF18/MCM8/MCMDC2/HNRNPA2B1/MCM7/CHD7/CDC45/BLM/TOP2A/POLQ/MCM6/MCM4/MCM2/MCM5/GINS2	16
BP	GO:0001913	T cell mediated cytotoxicity	11/1049	50/18800	7.7537e-05	0.00156194	0.00130045	LILRB1/HPRT1/HLA-E/CTSH/HLA-H/HLA-G/IL7R/PRF1/HLA-F/CD1E/IL23A	11
BP	GO:0002715	regulation of natural killer cell mediated immunity	11/1049	50/18800	7.7537e-05	0.00156194	0.00130045	LEP/LILRB1/HLA-E/HLA-G/LAG3/RASGRP1/KIR2DL4/CD96/HLA-F/SH2D1A/SLAMF6	11
BP	GO:0001556	oocyte maturation	8/1049	27/18800	7.83621e-05	0.00157274	0.00130943	CDC25B/DMC1/FOXO3/ANG/FBXO5/AURKA/TRIP13/REC8	8
BP	GO:0030099	myeloid cell differentiation	41/1049	391/18800	7.90126e-05	0.00157996	0.00131545	HIPK2/GPR137B/RBFOX2/CREB1/PRKX/STAT3/H4C8/KAT6A/KITLG/TRIB1/FOXO3/GLO1/LILRB1/PRKDC/H4C3/PARP1/TCIRG1/IRF8/IFNG/IKZF1/IL15/HCLS1/CEBPA/STAT1/VEGFA/INPP5D/PIK3CD/KLF2/IFI16/FES/LEF1/RASSF2/CCR7/PIP4K2A/BATF/CSF3R/IL23A/PTPN6/UBD/EVI2B/CCL19	41
BP	GO:1902100	negative regulation of metaphase/anaphase transition of cell cycle	10/1049	42/18800	8.02378e-05	0.00159858	0.00133095	NDC80/BUB1/CDT1/KNTC1/FBXO5/CCNB1/CENPF/TRIP13/TTK/AURKB	10
BP	GO:0060402	calcium ion transport into cytosol	23/1049	171/18800	8.08214e-05	0.00160433	0.00133574	SNCA/DMD/GSTO1/GP1BB/CHD7/GSTM2/NOL3/FYN/CCL21/PLCG2/RAMP3/CYBA/TRPV2/CXCL11/CORO1A/CCR7/MCOLN2/CXCL9/JSRP1/PTPN6/LIME1/CCL19/CD19	23
BP	GO:0033209	tumor necrosis factor-mediated signaling pathway	17/1049	107/18800	8.63582e-05	0.00170182	0.00141691	EIF5A/TNFRSF25/SPPL2A/ADAM17/FOXO3/SYK/NOL3/TNFRSF4/TNFRSF17/AIM2/STAT1/TNFAIP3/BIRC3/TNFRSF14/KRT18/PYCARD/CASP1	17
BP	GO:1903557	positive regulation of tumor necrosis factor superfamily cytokine production	17/1049	107/18800	8.63582e-05	0.00170182	0.00141691	SPN/LEP/STAT3/RIPK2/SYK/CCR2/IFNG/HLA-E/PLCG2/RASGRP1/CYBA/CD2/SASH3/IL23A/SPON2/PYCARD/CCL19	17
BP	GO:0032635	interleukin-6 production	23/1049	172/18800	8.84744e-05	0.00173098	0.00144119	LEP/STAT3/IL10/RIPK2/SELENOS/IL37/SYK/IFNG/PLCG2/ZC3H12A/POU2AF1/INPP5D/TNFAIP3/MBP/KLF2/BANK1/CYBA/SLAMF1/SYT11/PTPN6/SPON2/PYCARD/GHRL	23
BP	GO:0032675	regulation of interleukin-6 production	23/1049	172/18800	8.84744e-05	0.00173098	0.00144119	LEP/STAT3/IL10/RIPK2/SELENOS/IL37/SYK/IFNG/PLCG2/ZC3H12A/POU2AF1/INPP5D/TNFAIP3/MBP/KLF2/BANK1/CYBA/SLAMF1/SYT11/PTPN6/SPON2/PYCARD/GHRL	23
BP	GO:0045787	positive regulation of cell cycle	36/1049	329/18800	8.99017e-05	0.0017526	0.00145919	HNRNPU/CDK10/NUMA1/IL10/CDC25B/ADAM17/CDCA5/DLGAP5/CKS2/CENPV/NDC80/PSRC1/NUSAP1/RACGAP1/CDC25A/CDT1/KIF14/RRM1/FEN1/FBXO5/KIF23/UBE2C/E2F7/CCNB1/CDC7/AURKA/KIF20B/STIL/AURKB/ECT2/PLCG2/CCND2/EIF4EBP1/CXCR5/NUPR1/CCNY	36
BP	GO:0007163	establishment or maintenance of cell polarity	27/1049	219/18800	9.3607e-05	0.00181832	0.0015139	SPN/WWC1/GOLPH3/GSN/SYNJ2BP/NUMA1/RND3/NDC80/KIF2C/CENPA/KIF20B/DOCK2/TCIRG1/RAC2/MSN/CD3G/CCL21/BRSK1/RIPOR2/DOCK8/RHOD/FAT1/CCR7/MAP7/RAC3/PARVG/CCL19	27
BP	GO:0051315	attachment of mitotic spindle microtubules to kinetochore	6/1049	15/18800	9.62796e-05	0.00186357	0.00155158	HNRNPU/NDC80/KIF2C/CDT1/CENPE/AURKB	6
BP	GO:0007259	receptor signaling pathway via JAK-STAT	23/1049	173/18800	9.67666e-05	0.00186636	0.0015539	IFNAR2/LEP/STAT3/CSF2RA/MST1/IL10/IL18/OCIAD1/NOTCH1/STAT2/CCR2/FYN/IFNG/IL15/HCLS1/STAT5A/STAT1/IL7R/IL10RA/IL23A/CD40/STAT4/CCL5	23
BP	GO:0002709	regulation of T cell mediated immunity	15/1049	88/18800	9.81817e-05	0.00188696	0.00157105	DUSP22/IL18/AHR/LILRB1/WAS/CCR2/HLA-E/HLA-H/HLA-G/IL7R/SASH3/HLA-F/CD1E/SLAMF1/IL23A	15
BP	GO:0044786	cell cycle DNA replication	10/1049	43/18800	9.93721e-05	0.00190312	0.0015845	CDC45/BLM/CDT1/FEN1/FBXO5/E2F7/CDC7/MCM6/MCM4/MCM2	10
BP	GO:0034341	response to interferon-gamma	20/1049	140/18800	9.99409e-05	0.00190729	0.00158798	GSN/SNCA/EPRS1/WAS/IRF8/IFNG/CCL21/GBP5/GBP2/GBP4/CCL22/STAT1/NR1H3/FLNB/IRF1/CD40/UBD/CASP1/CCL19/CCL5	20
BP	GO:0010818	T cell chemotaxis	8/1049	28/18800	0.000104372	0.00198213	0.00165029	TNFSF14/ADAM17/CCR2/CXCL13/CCL21/PIK3CD/CXCL11/CCL5	8
BP	GO:0045860	positive regulation of protein kinase activity	41/1049	396/18800	0.000104591	0.00198213	0.00165029	LEP/RALB/PILRB/TNFSF15/KITLG/CDC25B/IL18/DUSP19/ADAM17/SNCA/SASH1/ANG/DRD4/CKS2/PSRC1/KIF14/CCNB1/LRP8/CENPE/TPX2/ECT2/TCL1A/SYK/LAT/IFNG/DVL3/CCL21/VEGFA/RASGRP1/CCND2/EFNA1/CCNY/RASSF2/CCR7/IL23A/CD40/CCL19/FGD2/GHRL/ADRB2/CCL5	41
BP	GO:0000910	cytokinesis	23/1049	174/18800	0.000105744	0.00199701	0.00166268	CDC25B/SPTBN1/CHMP1A/SPIRE2/CENPV/KIF20A/KIF4A/NUSAP1/PRC1/RACGAP1/CENPA/KIF14/STMN1/KIF23/E2F7/AURKA/KIF20B/ANLN/AURKB/ECT2/CEP55/CXCR5/SEPTIN6	23
BP	GO:0002676	regulation of chronic inflammatory response	5/1049	10/18800	0.000106646	0.00200708	0.00167106	IL10/IDO1/LTA/TNFAIP3/CCL5	5
BP	GO:0051403	stress-activated MAPK cascade	29/1049	245/18800	0.000109019	0.00204466	0.00170235	HIPK2/DUSP22/LEP/ZMYND11/MAPK9/FKTN/PDCD4/RIPK2/TRIB1/DUSP19/MAPK8IP3/SASH1/PBK/SH2D3C/ARHGEF6/CD27/CCL21/SH3RF1/MARVELD3/ZC3H12A/VEGFA/RASGRP1/SERPINF2/MAP4K1/RASSF2/CCR7/SLAMF1/PYCARD/CCL19	29
BP	GO:0001776	leukocyte homeostasis	15/1049	89/18800	0.000112087	0.00209498	0.00174425	TNFSF14/KITLG/ADAM17/CCNB2/TCIRG1/LAT/CCR2/TNFRSF13B/TNFRSF17/DOCK10/TNFAIP3/PIK3CD/CORO1A/GAPT/ADA	15
BP	GO:0002279	mast cell activation involved in immune response	11/1049	52/18800	0.000113187	0.00210111	0.00174935	RAC2/SYK/LAT/PTGDS/RASGRP1/LAT2/PIK3CD/FES/IL4R/PTPN6/FGR	11
BP	GO:0002448	mast cell mediated immunity	11/1049	52/18800	0.000113187	0.00210111	0.00174935	RAC2/SYK/LAT/PTGDS/RASGRP1/LAT2/PIK3CD/FES/IL4R/SPON2/FGR	11
BP	GO:0032496	response to lipopolysaccharide	36/1049	333/18800	0.000114879	0.00212526	0.00176945	TSPO/PDCD4/LITAF/IL10/RIPK2/SHPK/IL18/TRIB1/NOTCH1/ADAM17/SNCA/SELENOS/SASH1/LILRB1/IL37/IRF8/IDO1/LTA/CXCL13/IL18BP/PLCG2/ZC3H12A/VCAM1/TNFAIP3/NR1H3/IL10RA/CXCL11/CD96/CCR7/CXCL9/ALPL/SPON2/CD6/PYCARD/CASP1/CCL5	36
BP	GO:0002702	positive regulation of production of molecular mediator of immune response	18/1049	120/18800	0.000116339	0.00214497	0.00178587	DNAJB9/IL10/IL18/LILRB1/SLC7A5/TNFRSF4/MZB1/HLA-E/HLA-G/PLCG2/KIR2DL4/SASH3/HLA-F/SLAMF1/IL4R/CD40/SPON2/TNFRSF14	18
BP	GO:0071674	mononuclear cell migration	25/1049	199/18800	0.000124135	0.00228098	0.00189911	SPN/TNFSF14/ADAM17/AIRE/CCR2/MSN/CXCL13/CCL21/JAML/CH25H/CCL22/PIK3CD/MYO1G/RIPOR2/DOCK8/ITGB7/ITGAL/CXCL11/ZAP70/CCR7/SLAMF1/TNFRSF14/PYCARD/CCL19/CCL5	25
BP	GO:0061640	cytoskeleton-dependent cytokinesis	16/1049	100/18800	0.000126837	0.00232279	0.00193392	SPTBN1/CHMP1A/SPIRE2/KIF20A/KIF4A/NUSAP1/RACGAP1/CENPA/STMN1/KIF23/KIF20B/ANLN/AURKB/ECT2/CEP55/SEPTIN6	16
BP	GO:0032508	DNA duplex unwinding	15/1049	90/18800	0.000127676	0.0023303	0.00194017	CHD8/CHTF18/MCM8/MCMDC2/MCM7/CHD7/CDC45/BLM/TOP2A/POLQ/MCM6/MCM4/MCM2/MCM5/GINS2	15
BP	GO:0032874	positive regulation of stress-activated MAPK cascade	19/1049	132/18800	0.000133457	0.00241723	0.00201255	HIPK2/DUSP22/LEP/RIPK2/DUSP19/MAPK8IP3/SASH1/CD27/CCL21/SH3RF1/ZC3H12A/VEGFA/RASGRP1/SERPINF2/RASSF2/CCR7/SLAMF1/PYCARD/CCL19	19
BP	GO:0044089	positive regulation of cellular component biogenesis	48/1049	494/18800	0.000133545	0.00241723	0.00201255	TPM1/RALB/ULK1/MAPK9/BRK1/NUMA1/SNCA/MPHOSPH8/GNL3L/OCLN/ASAP1/WASHC1/PSRC1/CDT1/STIL/BAIAP2L2/ANLN/TCL1A/RAC2/SYK/IFNG/MSN/CXCL13/CCL21/GBP5/ATF7IP2/PLCG2/VEGFA/RIPOR2/SERPINF2/FES/SKAP1/SOX9/FNBP1L/PLEK/WARS1/SEMA4D/BIN1/CCR7/IRX3/BAIAP2L1/PIP4K2A/LCP1/EVL/PYCARD/CCL19/GHRL/CRB3	48
BP	GO:0045061	thymic T cell selection	7/1049	22/18800	0.000134217	0.00241723	0.00201255	AIRE/DOCK2/CD3G/CD3D/CD3E/ZAP70/CCR7	7
BP	GO:0045624	positive regulation of T-helper cell differentiation	7/1049	22/18800	0.000134217	0.00241723	0.00201255	NFKBIZ/RIPK2/IL18/MYB/IL4R/IL23A/CCL19	7
BP	GO:0030595	leukocyte chemotaxis	28/1049	236/18800	0.000136617	0.00244426	0.00203505	TNFSF14/MTUS1/IL10/ADAM17/RAC2/SYK/CCR2/CXADR/CXCL13/CCL21/JAML/CH25H/CCL22/VEGFA/PIK3CD/RIPOR2/CXCR5/GPR18/CXCL11/CORO1A/CCR7/CXCL9/SLAMF1/CSF3R/IL23A/GPSM3/CCL19/CCL5	28
BP	GO:0001773	myeloid dendritic cell activation	8/1049	29/18800	0.000137128	0.00244426	0.00203505	IL10/DOCK2/TSPAN32/CD2/SLAMF1/BATF/UBD/PYCARD	8
BP	GO:0007088	regulation of mitotic nuclear division	17/1049	111/18800	0.000137515	0.00244426	0.00203505	DLGAP5/NDC80/NUSAP1/BUB1/PKMYT1/CDT1/CDCA2/KNTC1/FBXO5/CCNB1/NEK2/CENPF/AURKA/TRIP13/TTK/KIF20B/AURKB	17
BP	GO:0014066	regulation of phosphatidylinositol 3-kinase signaling	17/1049	111/18800	0.000137515	0.00244426	0.00203505	LEP/INPP5E/IL18/PLXNB1/CEP55/HCLS1/HCST/RASGRP1/FBXL2/SOX9/SEMA4D/PIK3IP1/PPP1R16B/PTPN6/LIME1/FGR/CCL5	17
BP	GO:0070302	regulation of stress-activated protein kinase signaling cascade	25/1049	201/18800	0.000145674	0.00256862	0.00213859	HIPK2/RNF13/DUSP22/LEP/ZMYND11/FKTN/PDCD4/RIPK2/DUSP19/MAPK8IP3/SASH1/PBK/CD27/CCL21/SH3RF1/MARVELD3/ZC3H12A/VEGFA/RASGRP1/SERPINF2/RASSF2/CCR7/SLAMF1/PYCARD/CCL19	25
BP	GO:0002399	MHC class II protein complex assembly	6/1049	16/18800	0.000146788	0.00256862	0.00213859	HLA-DMA/HLA-DPB1/HLA-DOA/HLA-DOB/HLA-DMB/HLA-DQB2	6
BP	GO:0002503	peptide antigen assembly with MHC class II protein complex	6/1049	16/18800	0.000146788	0.00256862	0.00213859	HLA-DMA/HLA-DPB1/HLA-DOA/HLA-DOB/HLA-DMB/HLA-DQB2	6
BP	GO:0010820	positive regulation of T cell chemotaxis	6/1049	16/18800	0.000146788	0.00256862	0.00213859	TNFSF14/ADAM17/CCR2/CXCL13/CCL21/CCL5	6
BP	GO:0071824	protein-DNA complex subunit organization	28/1049	237/18800	0.000146873	0.00256862	0.00213859	H2BC8/H3C10/H4C8/KAT6A/H2BC12/DMC1/TAF1C/SMARCA4/GTF2H5/DLGAP5/CENPW/CENPV/CDC45/CENPA/CDT1/HJURP/KNTC1/H4C3/CENPN/H2AX/NASP/CHAF1B/CENPF/CENPE/MCM2/OIP5/BRF2/SOX9	28
BP	GO:0002861	regulation of inflammatory response to antigenic stimulus	10/1049	45/18800	0.000149376	0.00258744	0.00215426	IL10/PLA2G2D/SELENOS/SYK/FYN/LTA/HLA-E/CCR7/C3/FGR	10
BP	GO:0031295	T cell costimulation	10/1049	45/18800	0.000149376	0.00258744	0.00215426	TNFSF14/LGALS1/FYN/CCL21/CD3E/ICOS/CCR7/PTPN6/TNFRSF14/CCL19	10
BP	GO:0042088	T-helper 1 type immune response	10/1049	45/18800	0.000149376	0.00258744	0.00215426	SPN/RIPK2/IL18/CCR2/IL18BP/LEF1/SLAMF1/IL4R/IL23A/CCL19	10
BP	GO:0006874	cellular calcium ion homeostasis	45/1049	456/18800	0.000150804	0.00260388	0.00216795	ITGAV/SNCA/DMD/GSTO1/GP1BB/DRD4/CHD7/GSTM2/CD52/TCIRG1/NOL3/CCR2/FYN/APOE/CXCL13/STC2/CCL21/TGM2/P2RY10/PLCG2/CD38/RAMP3/ATP2A3/CXCR5/CYBA/GPR18/CXCR3/TRPV2/CXCL11/PRKCB/CORO1A/CCR7/MCOLN2/CXCL9/JSRP1/PTPN6/LIME1/CD40/CXCR6/BNIP3/P2RY8/CCL19/CD19/GHRL/CCL5	45
BP	GO:0007204	positive regulation of cytosolic calcium ion concentration	35/1049	325/18800	0.00015325	0.00263775	0.00219615	ITGAV/SNCA/DMD/GSTO1/GP1BB/CHD7/GSTM2/CD52/NOL3/CCR2/FYN/CXCL13/CCL21/P2RY10/PLCG2/CD38/RAMP3/CXCR5/CYBA/GPR18/CXCR3/TRPV2/CXCL11/CORO1A/CCR7/MCOLN2/CXCL9/JSRP1/PTPN6/LIME1/CXCR6/P2RY8/CCL19/CD19/GHRL	35
BP	GO:0060401	cytosolic calcium ion transport	24/1049	190/18800	0.000154508	0.002648	0.00220468	SNCA/DMD/GSTO1/GP1BB/CHD7/GSTM2/NOL3/FYN/CCL21/PLCG2/RAMP3/ATP2A3/CYBA/TRPV2/CXCL11/CORO1A/CCR7/MCOLN2/CXCL9/JSRP1/PTPN6/LIME1/CCL19/CD19	24
BP	GO:0018209	peptidyl-serine modification	36/1049	338/18800	0.00015482	0.002648	0.00220468	HIPK2/CSNK1E/PRKX/ULK1/MAPK9/DYRK2/MST1/RIPK2/SNCA/DMD/POGLUT1/MASTL/PRKDC/PARP1/CDC7/AURKA/CNKSR3/TTK/AURKB/TCL1A/SYK/SH2D3C/IFNG/PLCL2/CAMK1G/HCLS1/BRSK1/IKBKE/VEGFA/RAMP3/DDIT4/PRKCH/SPOCK2/MAP4K1/PRKCB/RASSF2	36
BP	GO:0002381	immunoglobulin production involved in immunoglobulin-mediated immune response	13/1049	73/18800	0.000178914	0.0030505	0.0025398	IL10/MSH6/EXO1/UNG/HLA-DMA/HLA-DPB1/HLA-DOA/HLA-DOB/HLA-DMB/BATF/CD40/GAPT/HLA-DQB2	13
BP	GO:0060326	cell chemotaxis	34/1049	315/18800	0.000181219	0.00307409	0.00255944	TNFSF14/DOCK4/MTUS1/IL10/NOTCH1/ADAM17/RAC2/SYK/CCR2/CXADR/CXCL13/CCL21/JAML/CH25H/CCL22/VEGFA/VCAM1/PIK3CD/RIPOR2/CXCR5/GPR18/CXCR3/CXCL11/LEF1/CORO1A/CCR7/CXCL9/SLAMF1/CSF3R/IL23A/GPSM3/CXCR6/CCL19/CCL5	34
BP	GO:0042269	regulation of natural killer cell mediated cytotoxicity	10/1049	46/18800	0.000181427	0.00307409	0.00255944	LEP/LILRB1/HLA-E/HLA-G/LAG3/RASGRP1/KIR2DL4/HLA-F/SH2D1A/SLAMF6	10
BP	GO:0010638	positive regulation of organelle organization	47/1049	487/18800	0.00018294	0.00309009	0.00257276	TPM1/RALB/ULK1/MAPK9/GRN/BRK1/GSN/NUMA1/SNCA/MPHOSPH8/HNRNPA2B1/OCLN/SLC25A4/PLAUR/ASAP1/DLGAP5/PSRC1/NCAPG/NUSAP1/CDT1/FEN1/NEK2/AURKA/SMC4/STIL/BAIAP2L2/AURKB/DKC1/WAS/MSN/TNFSF10/HCLS1/CCL21/GZMB/ATF7IP2/SERPINF2/FES/PLEK/BIN1/CCR7/BAIAP2L1/PIP4K2A/LCP1/EVL/BNIP3/PYCARD/ADRB2	47
BP	GO:0002237	response to molecule of bacterial origin	37/1049	354/18800	0.000184731	0.00311068	0.0025899	TSPO/PDCD4/LITAF/IL10/RIPK2/SHPK/IL18/TRIB1/NOTCH1/ADAM17/SNCA/SELENOS/SASH1/LILRB1/IL37/IRF8/IDO1/LTA/CXCL13/IL18BP/IRF5/PLCG2/ZC3H12A/VCAM1/TNFAIP3/NR1H3/IL10RA/CXCL11/CD96/CCR7/CXCL9/ALPL/SPON2/CD6/PYCARD/CASP1/CCL5	37
BP	GO:0031055	chromatin remodeling at centromere	5/1049	11/18800	0.000186529	0.00312163	0.00259902	CENPW/CENPV/HJURP/NASP/OIP5	5
BP	GO:0045060	negative thymic T cell selection	5/1049	11/18800	0.000186529	0.00312163	0.00259902	AIRE/DOCK2/CD3E/ZAP70/CCR7	5
BP	GO:0002478	antigen processing and presentation of exogenous peptide antigen	9/1049	38/18800	0.000190097	0.00314266	0.00261653	HLA-DMA/HLA-E/HLA-DPB1/HLA-DOA/HLA-DOB/HLA-DMB/HLA-F/HLA-DQB2/TAP1	9
BP	GO:0007094	mitotic spindle assembly checkpoint signaling	9/1049	38/18800	0.000190097	0.00314266	0.00261653	NDC80/BUB1/CDT1/KNTC1/CCNB1/CENPF/TRIP13/TTK/AURKB	9
BP	GO:0071173	spindle assembly checkpoint signaling	9/1049	38/18800	0.000190097	0.00314266	0.00261653	NDC80/BUB1/CDT1/KNTC1/CCNB1/CENPF/TRIP13/TTK/AURKB	9
BP	GO:0071174	mitotic spindle checkpoint signaling	9/1049	38/18800	0.000190097	0.00314266	0.00261653	NDC80/BUB1/CDT1/KNTC1/CCNB1/CENPF/TRIP13/TTK/AURKB	9
BP	GO:0007292	female gamete generation	21/1049	158/18800	0.000192042	0.00316521	0.0026353	LEP/MCM8/CDC25B/DIAPH2/DMC1/SPIRE2/FOXO3/ANG/TDRD1/MASTL/NDC80/TOP2A/FBXO5/HROB/CCNB2/AURKA/TRIP13/TTK/ASPM/REC8/IL4R	21
BP	GO:0002444	myeloid leukocyte mediated immunity	16/1049	104/18800	0.000202945	0.0033348	0.0027765	ADAM17/RAC2/SYK/DNASE1L3/LAT/CCR2/HLA-E/PTGDS/RASGRP1/LAT2/PIK3CD/FES/C3/IL4R/SPON2/FGR	16
BP	GO:0043122	regulation of I-kappaB kinase/NF-kappaB signaling	29/1049	254/18800	0.000204559	0.0033512	0.00279015	TRIM13/ZMYND11/LGALS1/LITAF/RIPK2/ZFAND6/PPM1B/ECT2/SHISA5/FYN/TNFSF10/CCL21/APOL3/IKBKE/TSPAN6/PLCG2/ZC3H12A/STAT1/TNFAIP3/BIRC3/PRKCB/CCR7/PIM2/LIME1/CD40/UBD/PYCARD/CASP1/CCL19	29
BP	GO:0033674	positive regulation of kinase activity	46/1049	476/18800	0.000206977	0.00338062	0.00281465	LEP/RALB/PILRB/TIGAR/TNFSF15/KITLG/CDC25B/IL18/DUSP19/ADAM17/SNCA/SASH1/ANG/DRD4/CKS2/PSRC1/KIF14/CCNB1/LRP8/CENPE/TPX2/ECT2/TCL1A/SYK/LAT/IFNG/DVL3/EPHB4/CCL21/VEGFA/RASGRP1/CCND2/DDR1/EFNA1/CCNY/RASSF2/CCR7/IL23A/CD40/FGR/CCL19/CD19/FGD2/GHRL/ADRB2/CCL5	46
BP	GO:0010819	regulation of T cell chemotaxis	6/1049	17/18800	0.000216175	0.00350978	0.00292218	TNFSF14/ADAM17/CCR2/CXCL13/CCL21/CCL5	6
BP	GO:0033631	cell-cell adhesion mediated by integrin	6/1049	17/18800	0.000216175	0.00350978	0.00292218	CXCL13/CD3E/SKAP1/FERMT3/ADA/CCL5	6
BP	GO:0031294	lymphocyte costimulation	10/1049	47/18800	0.000219067	0.00354615	0.00295247	TNFSF14/LGALS1/FYN/CCL21/CD3E/ICOS/CCR7/PTPN6/TNFRSF14/CCL19	10
BP	GO:1903046	meiotic cell cycle process	25/1049	207/18800	0.000231579	0.00373756	0.00311183	CDC25B/DMC1/C11orf80/SPIRE2/MASTL/CKS2/MSH6/NDC80/CDC20/PTTG1/BUB1/CDC25A/FANCD2/MND1/TOP2A/FBXO5/CCNB2/AURKA/TRIP13/TTK/SMC4/PTTG3P/ASPM/REC8/SLC2A8	25
BP	GO:0071216	cellular response to biotic stimulus	29/1049	256/18800	0.000233949	0.00375949	0.00313009	TSPO/TIGAR/PDCD4/LITAF/IL10/RIPK2/SHPK/IL18/TRIB1/NOTCH1/SELENOS/SASH1/LILRB1/IL37/SYK/IRF8/CXCL13/TXNIP/PLCG2/ZC3H12A/TNFAIP3/NR1H3/CXCL11/CXCL9/SPON2/CD6/PYCARD/CASP1/CCL5	29
BP	GO:0031577	spindle checkpoint signaling	9/1049	39/18800	0.000235011	0.00375949	0.00313009	NDC80/BUB1/CDT1/KNTC1/CCNB1/CENPF/TRIP13/TTK/AURKB	9
BP	GO:0032506	cytokinetic process	9/1049	39/18800	0.000235011	0.00375949	0.00313009	CHMP1A/SPIRE2/KIF20A/RACGAP1/KIF20B/ANLN/AURKB/ECT2/CEP55	9
BP	GO:0070227	lymphocyte apoptotic process	13/1049	75/18800	0.0002368	0.00377699	0.00314466	DFFA/IL10/AURKB/IDO1/CD3G/GIMAP8/CD27/DOCK8/EFNA1/IL7R/HSH2D/ADA/CCL5	13
BP	GO:0097696	receptor signaling pathway via STAT	23/1049	184/18800	0.000245297	0.00390109	0.00324798	IFNAR2/LEP/STAT3/CSF2RA/MST1/IL10/IL18/OCIAD1/NOTCH1/STAT2/CCR2/FYN/IFNG/IL15/HCLS1/STAT5A/STAT1/IL7R/IL10RA/IL23A/CD40/STAT4/CCL5	23
BP	GO:0019835	cytolysis	7/1049	24/18800	0.000246911	0.00390392	0.00325034	GSDMB/GZMB/GZMH/MICB/GZMA/PRF1/C7	7
BP	GO:0035458	cellular response to interferon-beta	7/1049	24/18800	0.000246911	0.00390392	0.00325034	UBE2G2/PNPT1/AIM2/STAT1/IFI16/IRF1/PYHIN1	7
BP	GO:0030593	neutrophil chemotaxis	16/1049	106/18800	0.000254044	0.00400506	0.00333455	RAC2/SYK/CXADR/CXCL13/CCL21/JAML/CCL22/PIK3CD/RIPOR2/CXCL11/CCR7/CXCL9/CSF3R/IL23A/CCL19/CCL5	16
BP	GO:0071677	positive regulation of mononuclear cell migration	12/1049	66/18800	0.000256911	0.00403856	0.00336244	SPN/TNFSF14/ADAM17/CCR2/CXCL13/CCL21/DOCK8/CCR7/SLAMF1/TNFRSF14/PYCARD/CCL5	12
BP	GO:0007265	Ras protein signal transduction	36/1049	347/18800	0.000259205	0.00406288	0.00338268	RALB/DLC1/BRK1/DENND4C/RAB9A/SYNJ2BP/KITLG/NOTCH1/RRAS2/CADM4/NTN1/CCNA2/KIF14/STMN1/WAS/RAC2/LAT/RASAL3/APOE/ARHGDIB/RAPGEFL1/P2RY10/ELMO1/RASGRP1/RGL1/RIPOR2/GPR18/RHOD/GRAP/ADGRG1/ARHGEF3/CYTH4/RASGRP2/CDC42SE2/P2RY8/ARHGAP4	36
BP	GO:0045839	negative regulation of mitotic nuclear division	10/1049	48/18800	0.000263043	0.00410687	0.00341931	NDC80/BUB1/CDT1/KNTC1/FBXO5/CCNB1/CENPF/TRIP13/TTK/AURKB	10
BP	GO:0002708	positive regulation of lymphocyte mediated immunity	17/1049	117/18800	0.000263522	0.00410687	0.00341931	IL18/LTA/HLA-E/HLA-H/HLA-G/LAG3/RASGRP1/KIR2DL4/SASH3/HLA-F/CD1E/C3/SLAMF1/SH2D1A/IL23A/CD40/SLAMF6	17
BP	GO:0045786	negative regulation of cell cycle	39/1049	387/18800	0.000266305	0.00413556	0.0034432	RBM14/CRADD/PDCD4/PRMT2/IL10/KAT2A/EIF2AK4/INIP/RPS27L/LILRB1/PRKDC/NDC80/PTTG1/BUB1/CDC45/BLM/CDT1/FANCD2/KNTC1/FBXO5/H2AX/E2F7/CCNB1/NEK2/CENPF/TRIP13/TTK/PTTG3P/AURKB/BTG2/CEBPA/RUNX3/CTDSPL/BRSK1/HLA-G/TNFAIP3/FBXO6/NUPR1/SIPA1	39
BP	GO:0046330	positive regulation of JNK cascade	15/1049	96/18800	0.000266884	0.00413556	0.0034432	HIPK2/DUSP22/RIPK2/DUSP19/MAPK8IP3/CD27/CCL21/SH3RF1/RASGRP1/SERPINF2/RASSF2/CCR7/SLAMF1/PYCARD/CCL19	15
BP	GO:0055074	calcium ion homeostasis	45/1049	468/18800	0.000270007	0.00417207	0.00347359	ITGAV/SNCA/DMD/GSTO1/GP1BB/DRD4/CHD7/GSTM2/CD52/TCIRG1/NOL3/CCR2/FYN/APOE/CXCL13/STC2/CCL21/TGM2/P2RY10/PLCG2/CD38/RAMP3/ATP2A3/CXCR5/CYBA/GPR18/CXCR3/TRPV2/CXCL11/PRKCB/CORO1A/CCR7/MCOLN2/CXCL9/JSRP1/PTPN6/LIME1/CD40/CXCR6/BNIP3/P2RY8/CCL19/CD19/GHRL/CCL5	45
BP	GO:0010950	positive regulation of endopeptidase activity	22/1049	174/18800	0.000281852	0.00434276	0.00361571	DLC1/CRADD/STAT3/GSN/TNFSF15/RIPK2/SNCA/RPS27L/SYK/PSME1/FYN/PSME2/TNFSF10/AIM2/CTSH/ATP2A3/EFNA1/MBP/IFI16/CYFIP2/PYCARD/CASP1	22
BP	GO:0002573	myeloid leukocyte differentiation	25/1049	210/18800	0.000289394	0.00442893	0.00368745	GPR137B/CREB1/KITLG/TRIB1/GLO1/LILRB1/PARP1/TCIRG1/IFNG/IL15/HCLS1/CEBPA/VEGFA/INPP5D/PIK3CD/IFI16/FES/LEF1/RASSF2/CCR7/BATF/IL23A/UBD/EVI2B/CCL19	25
BP	GO:0002717	positive regulation of natural killer cell mediated immunity	8/1049	32/18800	0.000289461	0.00442893	0.00368745	HLA-E/HLA-G/LAG3/RASGRP1/KIR2DL4/HLA-F/SH2D1A/SLAMF6	8
BP	GO:0032872	regulation of stress-activated MAPK cascade	24/1049	198/18800	0.000289888	0.00442893	0.00368745	HIPK2/DUSP22/LEP/ZMYND11/FKTN/PDCD4/RIPK2/DUSP19/MAPK8IP3/SASH1/PBK/CD27/CCL21/SH3RF1/MARVELD3/ZC3H12A/VEGFA/RASGRP1/SERPINF2/RASSF2/CCR7/SLAMF1/PYCARD/CCL19	24
BP	GO:0000086	G2/M transition of mitotic cell cycle	19/1049	140/18800	0.000290716	0.00442914	0.00368763	CDC25B/INIP/MASTL/MELK/SKP2/BLM/CDC25A/PKMYT1/CCNA2/KIF14/RRM1/FBXO5/CCNB1/CENPF/CDC7/AURKA/AURKB/BRSK1/CCNY	19
BP	GO:0071346	cellular response to interferon-gamma	17/1049	118/18800	0.000292184	0.00443908	0.0036959	GSN/EPRS1/WAS/IRF8/IFNG/CCL21/GBP5/GBP2/GBP4/CCL22/STAT1/NR1H3/FLNB/IRF1/CASP1/CCL19/CCL5	17
BP	GO:0043547	positive regulation of GTPase activity	30/1049	272/18800	0.000293191	0.00444196	0.0036983	RGS10/SGSM2/TBC1D15/EVI5/ARHGEF19/PLXNB1/ASAP1/ECT2/GRTP1/ADAP1/DVL3/CXCL13/CCL21/TGM2/DOCK10/RAPGEFL1/CCL22/RASGRP1/RGL1/DOCK8/ARHGAP25/SEMA4D/TBC1D10C/BIN1/CCR7/SIPA1/CD40/RASGRP2/CCL19/CCL5	30
BP	GO:1990868	response to chemokine	15/1049	97/18800	0.00029971	0.00451558	0.00375959	CCR2/CXCL13/CCL21/CCL22/ZC3H12A/RIPOR2/DOCK8/CXCR5/CXCR3/CXCL11/CCR7/CXCL9/CXCR6/CCL19/CCL5	15
BP	GO:1990869	cellular response to chemokine	15/1049	97/18800	0.00029971	0.00451558	0.00375959	CCR2/CXCL13/CCL21/CCL22/ZC3H12A/RIPOR2/DOCK8/CXCR5/CXCR3/CXCL11/CCR7/CXCL9/CXCR6/CCL19/CCL5	15
BP	GO:0032817	regulation of natural killer cell proliferation	5/1049	12/18800	0.000305084	0.00454618	0.00378507	LEP/IL18/IL15/HLA-E/IL23A	5
BP	GO:0043383	negative T cell selection	5/1049	12/18800	0.000305084	0.00454618	0.00378507	AIRE/DOCK2/CD3E/ZAP70/CCR7	5
BP	GO:0044771	meiotic cell cycle phase transition	5/1049	12/18800	0.000305084	0.00454618	0.00378507	CDC25B/NDC80/CDC25A/CCNB2/TTK	5
BP	GO:0051255	spindle midzone assembly	5/1049	12/18800	0.000305084	0.00454618	0.00378507	KIF4A/PRC1/RACGAP1/KIF23/AURKB	5
BP	GO:0002687	positive regulation of leukocyte migration	19/1049	141/18800	0.000318786	0.00472447	0.00393351	SPN/TNFSF14/KITLG/ADAM17/RAC2/CCR2/CXCL13/CCL21/VEGFA/RIPOR2/DOCK8/CCR7/SLAMF1/IL23A/GPSM3/TNFRSF14/PYCARD/CCL19/CCL5	19
BP	GO:0046328	regulation of JNK cascade	19/1049	141/18800	0.000318786	0.00472447	0.00393351	HIPK2/DUSP22/ZMYND11/FKTN/PDCD4/RIPK2/DUSP19/MAPK8IP3/CD27/CCL21/SH3RF1/MARVELD3/RASGRP1/SERPINF2/RASSF2/CCR7/SLAMF1/PYCARD/CCL19	19
BP	GO:0051656	establishment of organelle localization	40/1049	404/18800	0.000321464	0.00475121	0.00395578	HNRNPU/CEP19/BLOC1S6/AP3M2/NUMA1/SNCA/CHMP1A/SPIRE2/SAR1B/CDCA5/NTN1/DLGAP5/NDC80/PSRC1/KIF2C/NUSAP1/CENPA/CDT1/KIF14/CCNB1/CENPF/CDCA8/KIFC1/CENPE/AURKB/TCIRG1/RAC2/SYK/LAT/IFNG/PTGDS/RASGRP1/LAT2/PIK3CD/MYO1G/FES/FNBP1L/SYT11/IL4R/FGR	40
BP	GO:0050730	regulation of peptidyl-tyrosine phosphorylation	29/1049	261/18800	0.000324471	0.00478265	0.00398196	DUSP22/LEP/TNK2/KITLG/RIPK2/IL18/ADAM17/CADM4/LRP8/SYK/FYN/IFNG/ENPP2/IL15/HCLS1/CD3E/PLCG2/VEGFA/MVP/EFNA1/BANK1/SEMA4D/CSPG4/IL23A/PTPN6/CD40/TNFRSF14/GHRL/CCL5	29
BP	GO:0032816	positive regulation of natural killer cell activation	7/1049	25/18800	0.000326527	0.00479995	0.00399636	BLOC1S6/IL18/IL15/HLA-E/RASGRP1/HLA-F/IL23A	7
BP	GO:0000079	regulation of cyclin-dependent protein serine/threonine kinase activity	15/1049	98/18800	0.000335952	0.00489965	0.00407937	BCCIP/ADAM17/CKS2/PSRC1/GTPBP4/BLM/CDC25A/PKMYT1/CCNA2/CCNB1/CCNB2/CEBPA/TNFAIP3/CCND2/CCNY	15
BP	GO:0002718	regulation of cytokine production involved in immune response	15/1049	98/18800	0.000335952	0.00489965	0.00407937	IL10/IL18/LILRB1/SLC7A5/CCR2/HLA-E/HLA-G/PLCG2/KIR2DL4/CD96/SASH3/HLA-F/SLAMF1/SPON2/TNFRSF14	15
BP	GO:0140013	meiotic nuclear division	23/1049	188/18800	0.000336012	0.00489965	0.00407937	CDC25B/DMC1/C11orf80/SPIRE2/MASTL/CKS2/NDC80/CDC20/PTTG1/BUB1/FANCD2/MND1/TOP2A/FBXO5/CCNB2/AURKA/TRIP13/TTK/SMC4/PTTG3P/ASPM/REC8/SLC2A8	23
BP	GO:0002720	positive regulation of cytokine production involved in immune response	12/1049	68/18800	0.000342968	0.00498771	0.00415269	IL18/LILRB1/SLC7A5/HLA-E/HLA-G/PLCG2/KIR2DL4/SASH3/HLA-F/SLAMF1/SPON2/TNFRSF14	12
BP	GO:0033077	T cell differentiation in thymus	13/1049	78/18800	0.000353314	0.00512446	0.00426654	ADAM17/AIRE/PRKDC/DOCK2/BCL11B/CD3G/CD3D/CD3E/RASGRP1/IL7R/ZAP70/CCR7/ADA	13
BP	GO:0032633	interleukin-4 production	8/1049	33/18800	0.000363575	0.00523144	0.00435561	SLC7A5/SYK/HLA-E/CD3E/LEF1/SASH3/CD83/CLECL1	8
BP	GO:0032673	regulation of interleukin-4 production	8/1049	33/18800	0.000363575	0.00523144	0.00435561	SLC7A5/SYK/HLA-E/CD3E/LEF1/SASH3/CD83/CLECL1	8
BP	GO:0050901	leukocyte tethering or rolling	8/1049	33/18800	0.000363575	0.00523144	0.00435561	SPN/LEP/GOLPH3/CCR2/CCL21/VCAM1/ITGB7/SELL	8
BP	GO:0043303	mast cell degranulation	10/1049	50/18800	0.000373325	0.00535756	0.00446062	RAC2/SYK/LAT/PTGDS/RASGRP1/LAT2/PIK3CD/FES/IL4R/FGR	10
BP	GO:0018105	peptidyl-serine phosphorylation	33/1049	315/18800	0.000386028	0.00552527	0.00460025	HIPK2/CSNK1E/PRKX/ULK1/MAPK9/DYRK2/MST1/RIPK2/SNCA/DMD/MASTL/PRKDC/CDC7/AURKA/CNKSR3/TTK/AURKB/TCL1A/SYK/SH2D3C/IFNG/PLCL2/CAMK1G/HCLS1/BRSK1/IKBKE/VEGFA/RAMP3/DDIT4/PRKCH/MAP4K1/PRKCB/RASSF2	33
BP	GO:0002824	positive regulation of adaptive immune response based on somatic recombination of immune receptors built from immunoglobulin superfamily domains	16/1049	110/18800	0.000390399	0.00557318	0.00464014	NFKBIZ/RIPK2/IL18/CCR2/LTA/HLA-E/HLA-H/HLA-G/SASH3/HLA-F/CD1E/C3/SLAMF1/IL23A/CD40/ADA	16
BP	GO:0032715	negative regulation of interleukin-6 production	12/1049	69/18800	0.000394422	0.00561587	0.00467568	IL10/SELENOS/IL37/ZC3H12A/INPP5D/TNFAIP3/KLF2/BANK1/SLAMF1/SYT11/PTPN6/GHRL	12
BP	GO:0014065	phosphatidylinositol 3-kinase signaling	19/1049	144/18800	0.000417635	0.00593086	0.00493794	LEP/INPP5E/PLEKHA1/IL18/PLXNB1/CEP55/HCLS1/HCST/RASGRP1/PIK3CD/FBXL2/SOX9/SEMA4D/PIK3IP1/PPP1R16B/PTPN6/LIME1/FGR/CCL5	19
BP	GO:0002367	cytokine production involved in immune response	15/1049	100/18800	0.000419849	0.00594677	0.00495118	IL10/IL18/LILRB1/SLC7A5/CCR2/HLA-E/HLA-G/PLCG2/KIR2DL4/CD96/SASH3/HLA-F/SLAMF1/SPON2/TNFRSF14	15
BP	GO:0032467	positive regulation of cytokinesis	9/1049	42/18800	0.000425355	0.0060091	0.00500308	CDC25B/CENPV/RACGAP1/KIF14/KIF23/KIF20B/AURKB/ECT2/CXCR5	9
BP	GO:0007076	mitotic chromosome condensation	6/1049	19/18800	0.000430424	0.00606497	0.00504959	AKAP8L/CHMP1A/CDCA5/NCAPG/NUSAP1/SMC4	6
BP	GO:0070232	regulation of T cell apoptotic process	8/1049	34/18800	0.000452425	0.00635851	0.00529399	IDO1/GIMAP8/CD27/DOCK8/EFNA1/IL7R/ADA/CCL5	8
BP	GO:0010952	positive regulation of peptidase activity	23/1049	192/18800	0.000454941	0.00636915	0.00530285	DLC1/GRN/CRADD/STAT3/GSN/TNFSF15/RIPK2/SNCA/RPS27L/SYK/PSME1/FYN/PSME2/TNFSF10/AIM2/CTSH/ATP2A3/EFNA1/MBP/IFI16/CYFIP2/PYCARD/CASP1	23
BP	GO:0051279	regulation of release of sequestered calcium ion into cytosol	13/1049	80/18800	0.000455525	0.00636915	0.00530285	SNCA/DMD/GSTO1/CHD7/GSTM2/CYBA/CXCL11/CORO1A/CXCL9/JSRP1/PTPN6/LIME1/CD19	13
BP	GO:2000116	regulation of cysteine-type endopeptidase activity	26/1049	229/18800	0.000464642	0.00647997	0.00539511	TNFSF14/DLC1/CRADD/GSN/TNFSF15/RIPK2/SNCA/RPS27L/PLAUR/BIRC5/SYK/NOL3/FYN/TNFSF10/CD27/AIM2/SH3RF1/CTSH/VEGFA/ATP2A3/IFI16/CST7/BIRC3/CYFIP2/PYCARD/CASP1	26
BP	GO:1904029	regulation of cyclin-dependent protein kinase activity	15/1049	101/18800	0.00046813	0.00651191	0.00542171	BCCIP/ADAM17/CKS2/PSRC1/GTPBP4/BLM/CDC25A/PKMYT1/CCNA2/CCNB1/CCNB2/CEBPA/TNFAIP3/CCND2/CCNY	15
BP	GO:0019079	viral genome replication	18/1049	134/18800	0.000471121	0.0065368	0.00544243	ILF3/NUCKS1/FAM111A/PPIE/EIF2AK4/NOTCH1/MPHOSPH8/APOBEC3B/TOP2A/SRPK1/APOBEC3F/APOBEC3G/ZC3H12A/FBXL2/IFI16/ISG20/CXCR6/CCL5	18
BP	GO:0045765	regulation of angiogenesis	35/1049	345/18800	0.00047571	0.00657461	0.00547391	HIPK2/AGO2/LEP/SEMA3E/GRN/STAT3/SYNJ2BP/CCBE1/IL10/HTATIP2/TJP1/SASH1/NAXE/VASH2/CCR2/ENPP2/CXCL13/CTSH/HLA-G/ZC3H12A/STAT1/VEGFA/NIBAN2/TNFAIP3/PIK3CD/EFNA1/KLF2/ITGAX/ANGPTL4/WARS1/PRKCB/PPP1R16B/C3/CD40/GHRL	35
BP	GO:0071222	cellular response to lipopolysaccharide	25/1049	217/18800	0.000476264	0.00657461	0.00547391	TSPO/PDCD4/LITAF/IL10/RIPK2/SHPK/IL18/TRIB1/SELENOS/SASH1/LILRB1/IL37/IRF8/CXCL13/PLCG2/ZC3H12A/TNFAIP3/NR1H3/CXCL11/CXCL9/SPON2/CD6/PYCARD/CASP1/CCL5	25
BP	GO:0048525	negative regulation of viral process	14/1049	91/18800	0.000497102	0.0068449	0.00569895	TRIM13/ILF3/GSN/FAM111A/MPHOSPH8/APOBEC3B/SRPK1/APOBEC3F/APOBEC3G/CH25H/STAT1/IFI16/ISG20/CCL5	14
BP	GO:0002685	regulation of leukocyte migration	25/1049	218/18800	0.000510166	0.00700705	0.00583395	SPN/TNFSF14/MTUS1/KITLG/ADAM17/AIRE/RAC2/CCR2/MSN/CXCL13/CCL21/VEGFA/RIPOR2/DOCK8/GPR18/CXCR3/CCR7/SLAMF1/IL23A/GPSM3/TNFRSF14/PYCARD/CCL19/ADA/CCL5	25
BP	GO:0072331	signal transduction by p53 class mediator	21/1049	170/18800	0.000525452	0.00719882	0.00599362	HIPK2/EIF5A/CRADD/DYRK2/KAT6A/RPS27L/FOXO3/PTTG1IP/RPF2/E2F7/AURKA/AURKB/SHISA5/NDRG1/DDIT4/SOX4/IFI16/NUPR1/BATF/PYCARD/PYHIN1	21
BP	GO:0002710	negative regulation of T cell mediated immunity	7/1049	27/18800	0.00054696	0.00745593	0.00620768	DUSP22/AHR/LILRB1/HLA-G/IL7R/HLA-F/SLAMF1	7
BP	GO:0036037	CD8-positive, alpha-beta T cell activation	7/1049	27/18800	0.00054696	0.00745593	0.00620768	LILRB1/HLA-E/SH3RF1/RUNX3/GPR18/IRF1/EOMES	7
BP	GO:0006261	DNA-templated DNA replication	20/1049	159/18800	0.000559169	0.0076033	0.00633038	NUCKS1/CHTF18/FAM111A/POLD2/MCM7/CDC45/BLM/CDT1/RRM1/FEN1/FBXO5/POLQ/E2F7/CDC7/MCM6/MCM4/MCM2/MCM5/MCM10/GINS2	20
BP	GO:0061982	meiosis I cell cycle process	18/1049	136/18800	0.000564224	0.00765291	0.00637168	CDC25B/DMC1/C11orf80/CKS2/MSH6/NDC80/PTTG1/CDC25A/FANCD2/MND1/TOP2A/FBXO5/CCNB2/AURKA/TRIP13/PTTG3P/REC8/SLC2A8	18
BP	GO:0032731	positive regulation of interleukin-1 beta production	11/1049	62/18800	0.000571824	0.0077175	0.00642546	STAT3/RIPK2/GSDMD/IFNG/AIM2/GBP5/IFI16/PYCARD/CASP1/CCL19/PYHIN1	11
BP	GO:0043030	regulation of macrophage activation	11/1049	62/18800	0.000571824	0.0077175	0.00642546	GPR137B/GRN/IL10/SHPK/SNCA/CEBPA/ZC3H12A/NR1H3/CST7/SYT11/IL4R	11
BP	GO:0010522	regulation of calcium ion transport into cytosol	15/1049	103/18800	0.000579061	0.00778364	0.00648053	SNCA/DMD/GSTO1/CHD7/GSTM2/FYN/RAMP3/CYBA/CXCL11/CORO1A/CXCL9/JSRP1/PTPN6/LIME1/CD19	15
BP	GO:0050868	negative regulation of T cell activation	17/1049	125/18800	0.000579587	0.00778364	0.00648053	SPN/DUSP22/IL10/PLA2G2D/LILRB1/IDO1/LAX1/RUNX3/HLA-G/ZC3H12A/LAG3/RIPOR2/IL4R/IRF1/CTLA4/PTPN6/TNFRSF14	17
BP	GO:0002716	negative regulation of natural killer cell mediated immunity	6/1049	20/18800	0.000586043	0.00781247	0.00650454	LILRB1/HLA-E/HLA-G/KIR2DL4/CD96/HLA-F	6
BP	GO:0061484	hematopoietic stem cell homeostasis	6/1049	20/18800	0.000586043	0.00781247	0.00650454	ARMCX1/OCIAD1/UBAP2L/TCIRG1/SOX4/ADGRG1	6
BP	GO:0140131	positive regulation of lymphocyte chemotaxis	6/1049	20/18800	0.000586043	0.00781247	0.00650454	TNFSF14/ADAM17/CCR2/CXCL13/CCL21/CCL5	6
BP	GO:0006909	phagocytosis	32/1049	310/18800	0.000606416	0.00806429	0.00671419	LEP/GSN/ITGAV/DOCK2/RAC2/SYK/IRF8/CCR2/FYN/IFNG/IL15/TGM2/PLCG2/ELMO1/IL2RB/MYO1G/NR1H3/ARHGAP25/CYBA/ITGAL/CD300LF/IGLL1/CORO1A/ICAM3/C3/SLAMF1/SYT11/SPON2/FGR/CDC42SE2/PYCARD/IGKC	32
BP	GO:0016032	viral process	40/1049	418/18800	0.000634719	0.00842009	0.00701042	TRIM13/ATG12/ILF3/LGALS1/NUCKS1/CD46/GSN/FAM111A/ITGAV/PPIE/EIF3B/EIF2AK4/NOTCH1/DENR/MPHOSPH8/CHMP1A/SMARCA4/APOBEC3B/TOP2A/SRPK1/ST6GALNAC4/APOBEC3F/TNFRSF4/APOE/CXADR/CR2/APOBEC3G/CH25H/ZC3H12A/STAT1/FBXL2/IFI16/ITGB7/LEF1/SLAMF1/ISG20/TNFRSF14/CXCR6/SLC20A2/CCL5	40
BP	GO:1901342	regulation of vasculature development	35/1049	351/18800	0.000651163	0.00861722	0.00717455	HIPK2/AGO2/LEP/SEMA3E/GRN/STAT3/SYNJ2BP/CCBE1/IL10/HTATIP2/TJP1/SASH1/NAXE/VASH2/CCR2/ENPP2/CXCL13/CTSH/HLA-G/ZC3H12A/STAT1/VEGFA/NIBAN2/TNFAIP3/PIK3CD/EFNA1/KLF2/ITGAX/ANGPTL4/WARS1/PRKCB/PPP1R16B/C3/CD40/GHRL	35
BP	GO:0045123	cellular extravasation	12/1049	73/18800	0.000670263	0.00882703	0.00734924	SPN/LEP/GOLPH3/CCR2/CCL21/JAML/VCAM1/PIK3CD/RIPOR2/ITGB7/ITGAL/SELL	12
BP	GO:0045824	negative regulation of innate immune response	12/1049	73/18800	0.000670263	0.00882703	0.00734924	GRN/LILRB1/STAT2/HLA-E/SERPING1/HLA-G/KIR2DL4/TNFAIP3/NR1H3/IFI16/CD96/HLA-F	12
BP	GO:0002705	positive regulation of leukocyte mediated immunity	18/1049	138/18800	0.000672762	0.00883853	0.00735881	IL18/LTA/HLA-E/HLA-H/HLA-G/PLCG2/LAG3/RASGRP1/KIR2DL4/SASH3/HLA-F/CD1E/C3/SLAMF1/SH2D1A/IL23A/CD40/SLAMF6	18
BP	GO:0002690	positive regulation of leukocyte chemotaxis	14/1049	94/18800	0.000694546	0.00909287	0.00757057	TNFSF14/ADAM17/RAC2/CCR2/CXCL13/CCL21/VEGFA/RIPOR2/CCR7/SLAMF1/IL23A/GPSM3/CCL19/CCL5	14
BP	GO:0002467	germinal center formation	5/1049	14/18800	0.000702152	0.00909287	0.00757057	ADAM17/CXCL13/KLHL6/TNFAIP3/ADA	5
BP	GO:0002864	regulation of acute inflammatory response to antigenic stimulus	5/1049	14/18800	0.000702152	0.00909287	0.00757057	PLA2G2D/SELENOS/HLA-E/CCR7/C3	5
BP	GO:0045059	positive thymic T cell selection	5/1049	14/18800	0.000702152	0.00909287	0.00757057	DOCK2/CD3G/CD3D/CD3E/ZAP70	5
BP	GO:0051984	positive regulation of chromosome segregation	5/1049	14/18800	0.000702152	0.00909287	0.00757057	HNRNPU/NUMA1/CDT1/CCNB1/AURKB	5
BP	GO:0071801	regulation of podosome assembly	5/1049	14/18800	0.000702152	0.00909287	0.00757057	MAPK9/GSN/ASAP1/MSN/LCP1	5
BP	GO:0010677	negative regulation of cellular carbohydrate metabolic process	9/1049	45/18800	0.00072738	0.00939719	0.00782395	SOGA1/FAM3C/STAT3/TIGAR/MST1/SELENOS/DDIT4/NUPR1/PLEK	9
BP	GO:0051783	regulation of nuclear division	18/1049	139/18800	0.000733446	0.00945312	0.00787051	DLGAP5/NDC80/CDC20/NUSAP1/BUB1/PKMYT1/CDT1/CDCA2/KNTC1/FBXO5/CCNB1/NEK2/CENPF/AURKA/TRIP13/TTK/KIF20B/AURKB	18
BP	GO:0022408	negative regulation of cell-cell adhesion	23/1049	199/18800	0.000752918	0.00967061	0.00805159	SPN/DUSP22/IL10/NOTCH1/PLA2G2D/LILRB1/GTPBP4/IDO1/LAX1/CCL21/RUNX3/HLA-G/ZC3H12A/VEGFA/LAG3/AKNA/RIPOR2/MBP/IL4R/IRF1/CTLA4/PTPN6/TNFRSF14	23
BP	GO:0030888	regulation of B cell proliferation	11/1049	64/18800	0.000755655	0.00967061	0.00805159	IL10/AHR/TNFRSF13B/TNFRSF4/MZB1/CD38/INPP5D/SASH3/CTLA4/CD40/ADA	11
BP	GO:0048247	lymphocyte chemotaxis	11/1049	64/18800	0.000755655	0.00967061	0.00805159	TNFSF14/ADAM17/CCR2/CXCL13/CCL21/CH25H/CCL22/PIK3CD/CXCL11/CCL19/CCL5	11
BP	GO:0071621	granulocyte chemotaxis	17/1049	128/18800	0.00076272	0.0097153	0.0080888	RAC2/SYK/CXADR/CXCL13/CCL21/JAML/CCL22/PIK3CD/RIPOR2/CXCL11/CCR7/CXCL9/SLAMF1/CSF3R/IL23A/CCL19/CCL5	17
BP	GO:1990266	neutrophil migration	17/1049	128/18800	0.00076272	0.0097153	0.0080888	RAC2/SYK/CXADR/CXCL13/CCL21/JAML/CCL22/PIK3CD/RIPOR2/CXCL11/CCR7/MCOLN2/CXCL9/CSF3R/IL23A/CCL19/CCL5	17
BP	GO:0045010	actin nucleation	10/1049	55/18800	0.000825651	0.0104679	0.00871538	WASH3P/LMOD3/BRK1/GSN/SPIRE2/WASHC1/WAS/GMFG/CORO1A/EVL	10
BP	GO:0051784	negative regulation of nuclear division	10/1049	55/18800	0.000825651	0.0104679	0.00871538	NDC80/BUB1/CDT1/KNTC1/FBXO5/CCNB1/CENPF/TRIP13/TTK/AURKB	10
BP	GO:0051480	regulation of cytosolic calcium ion concentration	35/1049	356/18800	0.000838697	0.0106085	0.00883249	ITGAV/SNCA/DMD/GSTO1/GP1BB/CHD7/GSTM2/CD52/NOL3/CCR2/FYN/CXCL13/CCL21/P2RY10/PLCG2/CD38/RAMP3/CXCR5/CYBA/GPR18/CXCR3/TRPV2/CXCL11/CORO1A/CCR7/MCOLN2/CXCL9/JSRP1/PTPN6/LIME1/CXCR6/P2RY8/CCL19/CD19/GHRL	35
BP	GO:0072503	cellular divalent inorganic cation homeostasis	45/1049	494/18800	0.000855681	0.0107983	0.00899045	ITGAV/SNCA/DMD/GSTO1/GP1BB/DRD4/CHD7/GSTM2/CD52/TCIRG1/NOL3/CCR2/FYN/APOE/CXCL13/STC2/CCL21/TGM2/P2RY10/PLCG2/CD38/RAMP3/ATP2A3/CXCR5/CYBA/GPR18/CXCR3/TRPV2/CXCL11/PRKCB/CORO1A/CCR7/MCOLN2/CXCL9/JSRP1/PTPN6/LIME1/CD40/CXCR6/BNIP3/P2RY8/CCL19/CD19/GHRL/CCL5	45
BP	GO:0002260	lymphocyte homeostasis	11/1049	65/18800	0.00086451	0.0108844	0.00906219	TNFSF14/CCNB2/TCIRG1/LAT/TNFRSF13B/TNFRSF17/DOCK10/TNFAIP3/CORO1A/GAPT/ADA	11
BP	GO:0002825	regulation of T-helper 1 type immune response	7/1049	29/18800	0.000871832	0.0109513	0.00911783	RIPK2/IL18/CCR2/SLAMF1/IL4R/IL23A/CCL19	7
BP	GO:0019058	viral life cycle	32/1049	317/18800	0.0008857	0.0110998	0.00924152	ILF3/LGALS1/NUCKS1/CD46/GSN/FAM111A/ITGAV/PPIE/EIF2AK4/NOTCH1/MPHOSPH8/CHMP1A/APOBEC3B/TOP2A/SRPK1/APOBEC3F/TNFRSF4/APOE/CXADR/CR2/APOBEC3G/CH25H/ZC3H12A/FBXL2/IFI16/ITGB7/SLAMF1/ISG20/TNFRSF14/CXCR6/SLC20A2/CCL5	32
BP	GO:0006753	nucleoside phosphate metabolic process	45/1049	495/18800	0.000891999	0.0111531	0.00928586	TDG/MBD4/SULT1A1/ENO3/ACSL3/STAT3/TIGAR/HSD17B12/ADCY3/DCAKD/REXO2/SMPDL3A/PDE7A/ACOT1/ACSS1/SNCA/MPC2/ACOT2/FOXK1/PDE4C/ACOT9/UCK2/NUDT5/NAXE/NME1/RRM1/PPAT/PARP1/FLAD1/UNG/GMPS/CTPS1/HPRT1/IDO1/IFNG/TYMP/GIMAP7/LDHA/DDIT4/NUPR1/TPST2/SLC2A6/ENO1/ACSL5/ADA	45
BP	GO:1901654	response to ketone	22/1049	190/18800	0.000947144	0.0118154	0.00983731	TSPO/GLB1/GOLPH3/KLF9/ADCY3/AHR/FOXO3/NASP/PARP1/MSN/TXNIP/CCL21/CD38/DDIT4/NR1H3/MBP/KLF2/CYBA/MAP4K1/CCR7/CA9/CCL19	22
BP	GO:0050854	regulation of antigen receptor-mediated signaling pathway	11/1049	66/18800	0.00098603	0.0122724	0.0102178	DUSP22/PLCL2/LPXN/PRKCH/PRKCB/CCR7/SH2D1A/PTPN6/PVRIG/CD19/ADA	11
BP	GO:0006270	DNA replication initiation	8/1049	38/18800	0.000999588	0.0123401	0.0102742	MCM7/CDC45/CDT1/MCM6/MCM4/MCM2/MCM5/MCM10	8
BP	GO:0033260	nuclear DNA replication	8/1049	38/18800	0.000999588	0.0123401	0.0102742	CDC45/BLM/CDT1/FEN1/CDC7/MCM6/MCM4/MCM2	8
BP	GO:0045622	regulation of T-helper cell differentiation	8/1049	38/18800	0.000999588	0.0123401	0.0102742	NFKBIZ/RIPK2/IL18/MYB/ZC3H12A/IL4R/IL23A/CCL19	8
BP	GO:0000212	meiotic spindle organization	5/1049	15/18800	0.00100509	0.0123401	0.0102742	NDC80/FBXO5/CCNB2/AURKA/ASPM	5
BP	GO:0002517	T cell tolerance induction	5/1049	15/18800	0.00100509	0.0123401	0.0102742	AIRE/IDO1/CD3E/ICOS/HLA-G	5
BP	GO:0030852	regulation of granulocyte differentiation	5/1049	15/18800	0.00100509	0.0123401	0.0102742	TRIB1/HCLS1/INPP5D/LEF1/EVI2B	5
BP	GO:0070269	pyroptosis	6/1049	22/18800	0.00102494	0.0125555	0.0104535	GSDMB/GSDMD/AIM2/GZMB/GZMA/CASP1	6
BP	GO:0045069	regulation of viral genome replication	13/1049	87/18800	0.00103199	0.0126135	0.0105018	ILF3/FAM111A/PPIE/NOTCH1/MPHOSPH8/APOBEC3B/TOP2A/SRPK1/APOBEC3F/APOBEC3G/IFI16/ISG20/CCL5	13
BP	GO:0002700	regulation of production of molecular mediator of immune response	20/1049	167/18800	0.0010433	0.0127231	0.010593	DNAJB9/IL10/IL18/LILRB1/SLC7A5/CCR2/TNFRSF4/MZB1/HLA-E/HLA-G/PLCG2/KIR2DL4/CD96/SASH3/HLA-F/SLAMF1/IL4R/CD40/SPON2/TNFRSF14	20
BP	GO:0071219	cellular response to molecule of bacterial origin	25/1049	229/18800	0.00104721	0.0127423	0.010609	TSPO/PDCD4/LITAF/IL10/RIPK2/SHPK/IL18/TRIB1/SELENOS/SASH1/LILRB1/IL37/IRF8/CXCL13/PLCG2/ZC3H12A/TNFAIP3/NR1H3/CXCL11/CXCL9/SPON2/CD6/PYCARD/CASP1/CCL5	25
BP	GO:0031348	negative regulation of defense response	28/1049	268/18800	0.00107518	0.0130533	0.010868	ATG12/GRN/IL10/SELENOS/PPM1B/LILRB1/PBK/SYK/STAT2/RNF125/FYN/APOE/HLA-E/SERPING1/HLA-G/TSPAN6/KIR2DL4/MICB/TNFAIP3/NR1H3/IFI16/CD96/CST7/HLA-F/SYT11/FGR/ADA/GHRL	28
BP	GO:1903579	negative regulation of ATP metabolic process	7/1049	30/18800	0.00108302	0.0131193	0.0109229	TSPO/STAT3/TIGAR/SNCA/PARP1/DDIT4/NUPR1	7
BP	GO:0032720	negative regulation of tumor necrosis factor production	12/1049	77/18800	0.00109198	0.0131984	0.0109887	TSPO/IL10/SELENOS/LILRB1/IL37/ZC3H12A/TNFAIP3/GPR18/SLAMF1/SYT11/PTPN6/GHRL	12
BP	GO:0045071	negative regulation of viral genome replication	10/1049	57/18800	0.00110205	0.0132906	0.0110656	ILF3/FAM111A/MPHOSPH8/APOBEC3B/SRPK1/APOBEC3F/APOBEC3G/IFI16/ISG20/CCL5	10
BP	GO:1903038	negative regulation of leukocyte cell-cell adhesion	18/1049	144/18800	0.00111228	0.0133843	0.0111435	SPN/DUSP22/IL10/PLA2G2D/LILRB1/IDO1/LAX1/CCL21/RUNX3/HLA-G/ZC3H12A/LAG3/RIPOR2/IL4R/IRF1/CTLA4/PTPN6/TNFRSF14	18
BP	GO:0009117	nucleotide metabolic process	44/1049	487/18800	0.00114509	0.0137487	0.0114469	TDG/MBD4/SULT1A1/ENO3/ACSL3/STAT3/TIGAR/HSD17B12/ADCY3/DCAKD/REXO2/PDE7A/ACOT1/ACSS1/SNCA/MPC2/ACOT2/FOXK1/PDE4C/ACOT9/UCK2/NUDT5/NAXE/NME1/RRM1/PPAT/PARP1/FLAD1/UNG/GMPS/CTPS1/HPRT1/IDO1/IFNG/TYMP/GIMAP7/LDHA/DDIT4/NUPR1/TPST2/SLC2A6/ENO1/ACSL5/ADA	44
BP	GO:0032611	interleukin-1 beta production	15/1049	110/18800	0.00116025	0.0138695	0.0115475	STAT3/RIPK2/GSDMD/IFNG/AIM2/GBP5/ZC3H12A/TNFAIP3/IFI16/CCR7/PYCARD/CASP1/CCL19/GHRL/PYHIN1	15
BP	GO:0032651	regulation of interleukin-1 beta production	15/1049	110/18800	0.00116025	0.0138695	0.0115475	STAT3/RIPK2/GSDMD/IFNG/AIM2/GBP5/ZC3H12A/TNFAIP3/IFI16/CCR7/PYCARD/CASP1/CCL19/GHRL/PYHIN1	15
BP	GO:0045639	positive regulation of myeloid cell differentiation	14/1049	99/18800	0.00117004	0.0139253	0.011594	CREB1/STAT3/KITLG/TRIB1/FOXO3/PRKDC/IFNG/HCLS1/STAT1/INPP5D/FES/LEF1/IL23A/EVI2B	14
BP	GO:0050764	regulation of phagocytosis	14/1049	99/18800	0.00117004	0.0139253	0.011594	ITGAV/DOCK2/SYK/IFNG/IL15/TGM2/PLCG2/IL2RB/CYBA/CD300LF/C3/SYT11/FGR/PYCARD	14
BP	GO:0001912	positive regulation of leukocyte mediated cytotoxicity	10/1049	58/18800	0.00126622	0.0150371	0.0125196	HLA-E/HLA-H/HLA-G/LAG3/RASGRP1/HLA-F/CD1E/SH2D1A/IL23A/SLAMF6	10
BP	GO:1901992	positive regulation of mitotic cell cycle phase transition	14/1049	100/18800	0.00129217	0.0153118	0.0127483	CDK10/CDC25B/ADAM17/CDCA5/DLGAP5/CDC25A/CDT1/RRM1/FBXO5/UBE2C/CCNB1/CDC7/STIL/CCND2	14
BP	GO:0000075	cell cycle checkpoint signaling	20/1049	170/18800	0.00130059	0.015378	0.0128035	CRADD/EIF2AK4/INIP/RPS27L/PRKDC/NDC80/BUB1/CDC45/BLM/CDT1/FANCD2/KNTC1/H2AX/CCNB1/CENPF/TRIP13/TTK/AURKB/BRSK1/FBXO6	20
BP	GO:0002507	tolerance induction	7/1049	31/18800	0.00133236	0.0157195	0.0130878	AIRE/IDO1/HLA-E/CD3E/ICOS/HLA-G/TNFAIP3	7
BP	GO:0031331	positive regulation of cellular catabolic process	41/1049	449/18800	0.00135954	0.015984	0.013308	AGO2/SPTLC1/RALB/TRIM13/CSNK1E/HNRNPU/ULK1/SAMD4B/MAPK9/RIPK2/TRIB1/SNCA/ZSWIM8/PNPT1/PACSIN3/FOXO3/SLC25A4/PTTG1IP/GPSM1/RNF19A/CDC20/AURKA/USP13/IFNG/MSN/APOE/BTG2/BAG3/SH3RF1/CEBPA/ZC3H12A/TNFAIP3/NUPR1/SH3BP4/VGLL4/TP53INP1/PIP4K2A/PIM2/BNIP3/PYHIN1/ADRB2	41
BP	GO:0051098	regulation of binding	35/1049	366/18800	0.00136065	0.015984	0.013308	HIPK2/TDG/CARM1/RALB/CSNK1E/NUCKS1/IL10/RIPK2/GNL3L/PLAUR/GPSM1/DPH3/GTPBP4/NME1/CDT1/HJURP/STMN1/PARP1/NEK2/AURKA/AURKB/BAMBI/IFNG/PLCL2/APOE/MFNG/NIBAN2/ATP2A3/GZMA/RIPOR2/IFI16/LEF1/PTPRF/PYHIN1/ADRB2	35
BP	GO:1903556	negative regulation of tumor necrosis factor superfamily cytokine production	12/1049	79/18800	0.00137397	0.0161057	0.0134093	TSPO/IL10/SELENOS/LILRB1/IL37/ZC3H12A/TNFAIP3/GPR18/SLAMF1/SYT11/PTPN6/GHRL	12
BP	GO:1901741	positive regulation of myoblast fusion	5/1049	16/18800	0.00139522	0.0163196	0.0135874	TNFSF14/CD53/RIPOR2/CXCL9/IL4R	5
BP	GO:0050792	regulation of viral process	19/1049	159/18800	0.00141238	0.0164848	0.013725	TRIM13/ATG12/ILF3/LGALS1/GSN/FAM111A/PPIE/NOTCH1/MPHOSPH8/APOBEC3B/TOP2A/SRPK1/APOBEC3F/APOBEC3G/CH25H/STAT1/IFI16/ISG20/CCL5	19
BP	GO:0001914	regulation of T cell mediated cytotoxicity	8/1049	40/18800	0.00142403	0.0165852	0.0138086	LILRB1/HLA-E/HLA-H/HLA-G/IL7R/HLA-F/CD1E/IL23A	8
BP	GO:0002688	regulation of leukocyte chemotaxis	16/1049	124/18800	0.00146738	0.0170536	0.0141985	TNFSF14/MTUS1/ADAM17/RAC2/CCR2/CXCL13/CCL21/VEGFA/RIPOR2/GPR18/CCR7/SLAMF1/IL23A/GPSM3/CCL19/CCL5	16
BP	GO:0010508	positive regulation of autophagy	17/1049	136/18800	0.00150858	0.017495	0.014566	SPTLC1/RALB/TRIM13/ULK1/RIPK2/FOXO3/SLC25A4/GPSM1/IFNG/BAG3/ZC3H12A/SH3BP4/TP53INP1/PIP4K2A/PIM2/BNIP3/ADRB2	17
BP	GO:0010948	negative regulation of cell cycle process	30/1049	301/18800	0.00154119	0.017743	0.0147725	RBM14/CRADD/PRMT2/KAT2A/EIF2AK4/INIP/RPS27L/PRKDC/NDC80/PTTG1/BUB1/CDC45/BLM/CDT1/FANCD2/KNTC1/FBXO5/H2AX/E2F7/CCNB1/NEK2/CENPF/TRIP13/TTK/PTTG3P/AURKB/CTDSPL/BRSK1/HLA-G/FBXO6	30
BP	GO:0002291	T cell activation via T cell receptor contact with antigen bound to MHC molecule on antigen presenting cell	4/1049	10/18800	0.00154301	0.017743	0.0147725	LILRB1/APBB1IP/ITGAL/HLA-DMB	4
BP	GO:0009113	purine nucleobase biosynthetic process	4/1049	10/18800	0.00154301	0.017743	0.0147725	PPAT/GMPS/HPRT1/ADA	4
BP	GO:0032819	positive regulation of natural killer cell proliferation	4/1049	10/18800	0.00154301	0.017743	0.0147725	IL18/IL15/HLA-E/IL23A	4
BP	GO:0007249	I-kappaB kinase/NF-kappaB signaling	29/1049	288/18800	0.0015664	0.0179739	0.0149648	TRIM13/ZMYND11/LGALS1/LITAF/RIPK2/ZFAND6/PPM1B/ECT2/SHISA5/FYN/TNFSF10/CCL21/APOL3/IKBKE/TSPAN6/PLCG2/ZC3H12A/STAT1/TNFAIP3/BIRC3/PRKCB/CCR7/PIM2/LIME1/CD40/UBD/PYCARD/CASP1/CCL19	29
BP	GO:0032465	regulation of cytokinesis	13/1049	91/18800	0.00157489	0.0180333	0.0150142	CDC25B/CENPV/KIF20A/PRC1/RACGAP1/KIF14/KIF23/E2F7/AURKA/KIF20B/AURKB/ECT2/CXCR5	13
BP	GO:0070231	T cell apoptotic process	9/1049	50/18800	0.00160192	0.0183042	0.0152398	DFFA/IDO1/GIMAP8/CD27/DOCK8/EFNA1/IL7R/ADA/CCL5	9
BP	GO:0071260	cellular response to mechanical stimulus	11/1049	70/18800	0.00162163	0.0184832	0.0153888	TNFSF14/CRADD/MAP3K1/BAG3/CYBA/SOX9/SLC2A1/IRF1/CD40/BNIP3/CASP1	11
BP	GO:0036297	interstrand cross-link repair	7/1049	32/18800	0.00162437	0.0184832	0.0153888	NUCKS1/MCM8/EXO5/DCLRE1C/FAAP20/FANCD2/HROB	7
BP	GO:0051302	regulation of cell division	21/1049	186/18800	0.00167999	0.0189396	0.0157688	CDC25B/KAT2A/CENPV/KIF20A/PRC1/RACGAP1/BLM/KIF14/KIF23/E2F7/AURKA/KIF20B/ASPM/AURKB/ECT2/TXNIP/VEGFA/LBH/CXCR5/YEATS2/EVI2B	21
BP	GO:0001779	natural killer cell differentiation	6/1049	24/18800	0.00168016	0.0189396	0.0157688	IL15/RASGRP1/PIK3CD/SLAMF1/PRDM1/ZNF683	6
BP	GO:0032740	positive regulation of interleukin-17 production	6/1049	24/18800	0.00168016	0.0189396	0.0157688	IL18/SLC7A5/IL15/RFTN1/IL23A/SLAMF6	6
BP	GO:0090023	positive regulation of neutrophil chemotaxis	6/1049	24/18800	0.00168016	0.0189396	0.0157688	RAC2/CCL21/RIPOR2/CCR7/IL23A/CCL19	6
BP	GO:0032733	positive regulation of interleukin-10 production	8/1049	41/18800	0.00168406	0.0189396	0.0157688	STAT3/CD46/SYK/PLCG2/SASH3/CD83/IL23A/PYCARD	8
BP	GO:0046777	protein autophosphorylation	24/1049	224/18800	0.00168538	0.0189396	0.0157688	PRKX/ULK1/PIM3/HTATIP2/EIF2AK4/MELK/NEK2/AURKA/TTK/AURKB/SYK/FYN/EPHB4/VEGFA/MVP/DDR1/FES/MAP4K1/ZAP70/RASSF2/CDK12/PIM2/FGR/ITK	24
BP	GO:0051258	protein polymerization	28/1049	277/18800	0.00176583	0.0198028	0.0164875	HAUS2/LMOD3/GSN/NUMA1/DIAPH2/SNCA/SPTBN1/SPIRE2/OCLN/ANG/PSRC1/STMN1/FBXO5/UBE2C/UBE2S/BAIAP2L2/TPX2/WAS/HCLS1/CCL21/FES/BIN1/CORO1A/CCR7/BAIAP2L1/CYFIP2/EVL/PYCARD	28
BP	GO:0045912	negative regulation of carbohydrate metabolic process	9/1049	51/18800	0.00185058	0.0207105	0.0172432	SOGA1/FAM3C/STAT3/TIGAR/MST1/SELENOS/DDIT4/NUPR1/PLEK	9
BP	GO:0034113	heterotypic cell-cell adhesion	10/1049	61/18800	0.00188168	0.0210063	0.0174895	ITGAV/IL10/CXADR/VCAM1/DSP/MBP/ITGB7/CD2/SKAP1/ITGAX	10
BP	GO:0002295	T-helper cell lineage commitment	5/1049	17/18800	0.00188649	0.0210063	0.0174895	SPN/STAT3/BATF/IL23A/SLAMF6	5
BP	GO:0007162	negative regulation of cell adhesion	30/1049	305/18800	0.00188923	0.0210063	0.0174895	SPN/DUSP22/DLC1/SEMA3E/IL10/NOTCH1/PLA2G2D/PLXNB1/LILRB1/GTPBP4/IDO1/LAX1/CCL21/RUNX3/ARHGDIB/HLA-G/LPXN/ZC3H12A/VEGFA/LAG3/AKNA/RIPOR2/MBP/SEMA4D/SIPA1/IL4R/IRF1/CTLA4/PTPN6/TNFRSF14	30
BP	GO:0050830	defense response to Gram-positive bacterium	14/1049	104/18800	0.00189246	0.0210063	0.0174895	H2BC8/RIPK2/H2BC12/ADAM17/ANG/GSDMD/LTA/HLA-E/GBP2/GBP4/IL7R/TNFRSF14/FGR/PYCARD	14
BP	GO:0051052	regulation of DNA metabolic process	42/1049	472/18800	0.00195341	0.0216387	0.018016	DFFA/HNRNPU/NUCKS1/CHTF18/TIGAR/ZNF91/IL10/MPHOSPH8/GNL3L/CDAN1/HNRNPA2B1/SPIRE2/MORF4L2/MRGBP/AUNIP/PRKDC/MSH6/GTPBP4/USP1/BLM/CDT1/CCNA2/FBXO5/POLQ/H2AX/PARP1/RMI2/E2F7/NEK2/CDC7/AURKB/DKC1/WAS/JADE2/PARM1/TINF2/NIBAN2/GZMA/IL7R/GINS2/GRHL2/CD40	42
BP	GO:0036336	dendritic cell migration	7/1049	33/18800	0.00196382	0.0217098	0.0180752	CCR2/CCL21/DOCK8/CCR7/SLAMF1/CCL19/CCL5	7
BP	GO:2000249	regulation of actin cytoskeleton reorganization	8/1049	42/18800	0.00198022	0.0218467	0.0181892	SEMA3E/TJP1/BAIAP2L2/HCLS1/ARHGDIB/GMFG/FES/BAIAP2L1	8
BP	GO:0071675	regulation of mononuclear cell migration	15/1049	116/18800	0.00199199	0.0219321	0.0182603	SPN/TNFSF14/ADAM17/AIRE/CCR2/MSN/CXCL13/CCL21/RIPOR2/DOCK8/CCR7/SLAMF1/TNFRSF14/PYCARD/CCL5	15
BP	GO:0001911	negative regulation of leukocyte mediated cytotoxicity	6/1049	25/18800	0.00210762	0.0229726	0.0191266	LILRB1/HLA-E/HLA-G/KIR2DL4/IL7R/HLA-F	6
BP	GO:0002438	acute inflammatory response to antigenic stimulus	6/1049	25/18800	0.00210762	0.0229726	0.0191266	PLA2G2D/SELENOS/HLA-E/CCR7/C3/CD6	6
BP	GO:0031579	membrane raft organization	6/1049	25/18800	0.00210762	0.0229726	0.0191266	GSN/NAXE/DOCK2/RFTN1/MAL/CD2	6
BP	GO:0032753	positive regulation of interleukin-4 production	6/1049	25/18800	0.00210762	0.0229726	0.0191266	SLC7A5/SYK/HLA-E/CD3E/SASH3/CLECL1	6
BP	GO:0071459	protein localization to chromosome, centromeric region	6/1049	25/18800	0.00210762	0.0229726	0.0191266	NDC80/CENPA/CDT1/KNTC1/TTK/AURKB	6
BP	GO:0048015	phosphatidylinositol-mediated signaling	20/1049	177/18800	0.00211857	0.0230458	0.0191876	LEP/INPP5E/PLEKHA1/IL18/PLXNB1/CEP55/PLCL2/HCLS1/HCST/RASGRP1/PIK3CD/FBXL2/SOX9/SEMA4D/PIK3IP1/PPP1R16B/PTPN6/LIME1/FGR/CCL5	20
BP	GO:0032612	interleukin-1 production	16/1049	129/18800	0.00222027	0.0240559	0.0200285	STAT3/IL10/RIPK2/GSDMD/IFNG/AIM2/GBP5/ZC3H12A/TNFAIP3/IFI16/CCR7/PYCARD/CASP1/CCL19/GHRL/PYHIN1	16
BP	GO:0032652	regulation of interleukin-1 production	16/1049	129/18800	0.00222027	0.0240559	0.0200285	STAT3/IL10/RIPK2/GSDMD/IFNG/AIM2/GBP5/ZC3H12A/TNFAIP3/IFI16/CCR7/PYCARD/CASP1/CCL19/GHRL/PYHIN1	16
BP	GO:0038061	NIK/NF-kappaB signaling	17/1049	141/18800	0.00223332	0.0241491	0.0201062	TNFSF14/PDCD4/LITAF/TNFSF15/IL18/SASH1/PPM1B/NOL3/CD27/IKBKE/TSPAN6/ZC3H12A/BIRC3/RASSF2/IL23A/LIME1/CCL19	17
BP	GO:0034655	nucleobase-containing compound catabolic process	37/1049	405/18800	0.00225458	0.0243307	0.0202574	DFFA/TDG/MBD4/AGO2/CTIF/EXOSC1/HNRNPU/ELAVL1/SAMD4B/SMPDL3A/PDE7A/UPF2/TBRG4/ZSWIM8/PNPT1/PHAX/PDE4C/ANG/NUDT5/APOBEC3B/FEN1/UNG/PKP1/HPRT1/DKC1/CIRBP/DNASE1L3/APOBEC3F/BTG2/APOBEC3G/TYMP/IKBKE/ZC3H12A/ADA2/ISG20/TENT5C/ADA	37
BP	GO:0042116	macrophage activation	14/1049	106/18800	0.00226998	0.0244483	0.0203553	GPR137B/GRN/IL10/SHPK/SNCA/SYK/IFNG/CEBPA/PLCG2/ZC3H12A/NR1H3/CST7/SYT11/IL4R	14
BP	GO:0016239	positive regulation of macroautophagy	11/1049	73/18800	0.00229099	0.02453	0.0204232	SPTLC1/RALB/TRIM13/ULK1/RIPK2/SLC25A4/GPSM1/BAG3/PIP4K2A/BNIP3/ADRB2	11
BP	GO:0032732	positive regulation of interleukin-1 production	11/1049	73/18800	0.00229099	0.02453	0.0204232	STAT3/RIPK2/GSDMD/IFNG/AIM2/GBP5/IFI16/PYCARD/CASP1/CCL19/PYHIN1	11
BP	GO:0042771	intrinsic apoptotic signaling pathway in response to DNA damage by p53 class mediator	8/1049	43/18800	0.0023159	0.02453	0.0204232	HIPK2/DYRK2/RPS27L/SHISA5/DDIT4/IFI16/NUPR1/PYCARD	8
BP	GO:0014889	muscle atrophy	4/1049	11/18800	0.00231815	0.02453	0.0204232	GSN/FOXO3/NOL3/IL15	4
BP	GO:0046643	regulation of gamma-delta T cell activation	4/1049	11/18800	0.00231815	0.02453	0.0204232	LILRB1/SYK/SOX4/LEF1	4
BP	GO:0071803	positive regulation of podosome assembly	4/1049	11/18800	0.00231815	0.02453	0.0204232	MAPK9/ASAP1/MSN/LCP1	4
BP	GO:0097048	dendritic cell apoptotic process	4/1049	11/18800	0.00231815	0.02453	0.0204232	LILRB1/CCL21/CCR7/CCL19	4
BP	GO:1904668	positive regulation of ubiquitin protein ligase activity	4/1049	11/18800	0.00231815	0.02453	0.0204232	MASTL/CDC20/UBE2C/UBE2S	4
BP	GO:2000668	regulation of dendritic cell apoptotic process	4/1049	11/18800	0.00231815	0.02453	0.0204232	LILRB1/CCL21/CCR7/CCL19	4
BP	GO:0002495	antigen processing and presentation of peptide antigen via MHC class II	7/1049	34/18800	0.00235566	0.0248303	0.0206733	HLA-DMA/HLA-DPB1/HLA-DOA/HLA-DOB/HLA-DMB/HLA-DQB2/PYCARD	7
BP	GO:0032743	positive regulation of interleukin-2 production	7/1049	34/18800	0.00235566	0.0248303	0.0206733	RIPK2/SPTBN1/CCR2/CD3E/PLCG2/SASH3/CD83	7
BP	GO:0097530	granulocyte migration	18/1049	154/18800	0.00238248	0.0250644	0.0208682	RAC2/SYK/CXADR/CXCL13/CCL21/JAML/CCL22/PIK3CD/RIPOR2/CXCL11/CCR7/MCOLN2/CXCL9/SLAMF1/CSF3R/IL23A/CCL19/CCL5	18
BP	GO:0007093	mitotic cell cycle checkpoint signaling	16/1049	130/18800	0.00240409	0.0251309	0.0209236	CRADD/INIP/RPS27L/PRKDC/NDC80/BUB1/BLM/CDT1/FANCD2/KNTC1/CCNB1/CENPF/TRIP13/TTK/AURKB/BRSK1	16
BP	GO:0007127	meiosis I	16/1049	130/18800	0.00240409	0.0251309	0.0209236	CDC25B/DMC1/C11orf80/CKS2/NDC80/PTTG1/FANCD2/MND1/TOP2A/FBXO5/CCNB2/AURKA/TRIP13/PTTG3P/REC8/SLC2A8	16
BP	GO:0010212	response to ionizing radiation	17/1049	142/18800	0.0024086	0.0251309	0.0209236	TRIM13/NUCKS1/TIGAR/XRCC2/INIP/DCLRE1C/GTF2H5/PRKDC/BLM/FANCD2/H2AX/PARP1/BARD1/ECT2/VCAM1/IFI16/CYBA	17
BP	GO:0032613	interleukin-10 production	10/1049	63/18800	0.0024119	0.0251309	0.0209236	STAT3/CD46/LILRB1/SYK/IDO1/PLCG2/SASH3/CD83/IL23A/PYCARD	10
BP	GO:0032653	regulation of interleukin-10 production	10/1049	63/18800	0.0024119	0.0251309	0.0209236	STAT3/CD46/LILRB1/SYK/IDO1/PLCG2/SASH3/CD83/IL23A/PYCARD	10
BP	GO:0002827	positive regulation of T-helper 1 type immune response	5/1049	18/18800	0.00249322	0.0257806	0.0214645	RIPK2/IL18/CCR2/SLAMF1/IL23A	5
BP	GO:0046112	nucleobase biosynthetic process	5/1049	18/18800	0.00249322	0.0257806	0.0214645	PPAT/GMPS/CTPS1/HPRT1/ADA	5
BP	GO:0048535	lymph node development	5/1049	18/18800	0.00249322	0.0257806	0.0214645	IL15/LTA/CXCR5/IL7R/LTB	5
BP	GO:0051782	negative regulation of cell division	5/1049	18/18800	0.00249322	0.0257806	0.0214645	BLM/E2F7/ASPM/AURKB/TXNIP	5
BP	GO:0007015	actin filament organization	40/1049	450/18800	0.00251573	0.0259641	0.0216173	TPM1/DLC1/WASH3P/LMOD3/BRK1/GSN/INPPL1/RND3/SHROOM4/DIAPH2/SPTBN1/TJP1/SPIRE2/ANG/WASHC1/STMN1/BAIAP2L2/WAS/RAC2/HCLS1/CCL21/ELMO1/MYO1G/GMFG/SERPINF2/ARHGAP25/RHOD/FAT1/PLEK/BIN1/CORO1A/CCR7/BAIAP2L1/RAC3/CYFIP2/LCP1/SHROOM3/EVL/PYCARD/GHRL	40
BP	GO:0002377	immunoglobulin production	23/1049	218/18800	0.00253715	0.0261355	0.02176	DNAJB9/IL10/PRKDC/MSH6/EXO1/POLQ/UNG/HLA-DMA/TNFRSF4/MZB1/HLA-E/HLA-DPB1/HLA-DOA/HLA-DOB/VPREB3/SASH3/HLA-DMB/IL4R/BATF/CD40/GAPT/HLA-DQB2/IGKC	23
BP	GO:0030010	establishment of cell polarity	17/1049	143/18800	0.00259522	0.0266328	0.022174	WWC1/GOLPH3/GSN/NUMA1/NDC80/CENPA/KIF20B/DOCK2/TCIRG1/MSN/CCL21/BRSK1/RIPOR2/DOCK8/FAT1/CCR7/CCL19	17
BP	GO:2001056	positive regulation of cysteine-type endopeptidase activity	17/1049	143/18800	0.00259522	0.0266328	0.022174	DLC1/CRADD/GSN/TNFSF15/RIPK2/SNCA/RPS27L/SYK/FYN/TNFSF10/AIM2/CTSH/ATP2A3/IFI16/CYFIP2/PYCARD/CASP1	17
BP	GO:0002407	dendritic cell chemotaxis	6/1049	26/18800	0.00261226	0.0266568	0.022194	CCR2/CCL21/CCR7/SLAMF1/CCL19/CCL5	6
BP	GO:0033622	integrin activation	6/1049	26/18800	0.00261226	0.0266568	0.022194	KIF14/MZB1/CXCL13/SKAP1/PLEK/FERMT3	6
BP	GO:1901623	regulation of lymphocyte chemotaxis	6/1049	26/18800	0.00261226	0.0266568	0.022194	TNFSF14/ADAM17/CCR2/CXCL13/CCL21/CCL5	6
BP	GO:1903169	regulation of calcium ion transmembrane transport	18/1049	156/18800	0.00274567	0.0279658	0.0232838	SNCA/DMD/GSTO1/DRD4/CHD7/GSTM2/FYN/PLCG2/RAMP3/CYBA/CXCL11/BIN1/CORO1A/CXCL9/JSRP1/PTPN6/LIME1/CD19	18
BP	GO:0048017	inositol lipid-mediated signaling	20/1049	181/18800	0.00275635	0.028022	0.0233307	LEP/INPP5E/PLEKHA1/IL18/PLXNB1/CEP55/PLCL2/HCLS1/HCST/RASGRP1/PIK3CD/FBXL2/SOX9/SEMA4D/PIK3IP1/PPP1R16B/PTPN6/LIME1/FGR/CCL5	20
BP	GO:0048599	oocyte development	9/1049	54/18800	0.00278603	0.0282709	0.0235379	CDC25B/DMC1/FOXO3/ANG/TDRD1/FBXO5/AURKA/TRIP13/REC8	9
BP	GO:0050869	negative regulation of B cell activation	7/1049	35/18800	0.00280505	0.0284109	0.0236545	IL10/TNFRSF13B/INPP5D/TNFAIP3/BANK1/TBC1D10C/CTLA4	7
BP	GO:0010389	regulation of G2/M transition of mitotic cell cycle	13/1049	97/18800	0.00281613	0.0284701	0.0237037	CDC25B/INIP/BLM/CDC25A/KIF14/RRM1/FBXO5/CCNB1/CENPF/CDC7/AURKA/AURKB/BRSK1	13
BP	GO:0071902	positive regulation of protein serine/threonine kinase activity	22/1049	208/18800	0.00301442	0.0304182	0.0253257	RALB/KITLG/DUSP19/ADAM17/SNCA/SASH1/DRD4/CKS2/PSRC1/CCNB1/TCL1A/SYK/IFNG/DVL3/VEGFA/RASGRP1/CCND2/CCNY/CD40/CCL19/FGD2/ADRB2	22
BP	GO:0032479	regulation of type I interferon production	13/1049	98/18800	0.00308506	0.031016	0.0258234	IL10/RIPK2/PPM1B/LILRB1/POLR3A/SYK/IRF8/RNF125/IRF5/PLCG2/STAT1/IRF1/PYCARD	13
BP	GO:0032606	type I interferon production	13/1049	98/18800	0.00308506	0.031016	0.0258234	IL10/RIPK2/PPM1B/LILRB1/POLR3A/SYK/IRF8/RNF125/IRF5/PLCG2/STAT1/IRF1/PYCARD	13
BP	GO:0002920	regulation of humoral immune response	8/1049	45/18800	0.00311994	0.0312511	0.0260191	CD46/CR2/LTA/CXCL13/SERPING1/CCR7/C3/PTPN6	8
BP	GO:0046427	positive regulation of receptor signaling pathway via JAK-STAT	8/1049	45/18800	0.00311994	0.0312511	0.0260191	LEP/IL10/OCIAD1/NOTCH1/IL7R/IL10RA/IL23A/CCL5	8
BP	GO:0048469	cell maturation	20/1049	183/18800	0.00313128	0.0313071	0.0260658	CATSPER2/CDC25B/DMC1/FOXO3/ANG/TDRD1/KIF14/FBXO5/AURKA/TRIP13/CABYR/REC8/IL15/CCL21/CEBPA/VEGFA/KLF2/C3/RAC3/CCL19	20
BP	GO:0002763	positive regulation of myeloid leukocyte differentiation	9/1049	55/18800	0.00316958	0.0315964	0.0263066	CREB1/KITLG/TRIB1/IFNG/HCLS1/FES/LEF1/IL23A/EVI2B	9
BP	GO:0045954	positive regulation of natural killer cell mediated cytotoxicity	6/1049	27/18800	0.00320235	0.0315964	0.0263066	HLA-E/LAG3/RASGRP1/HLA-F/SH2D1A/SLAMF6	6
BP	GO:0071624	positive regulation of granulocyte chemotaxis	6/1049	27/18800	0.00320235	0.0315964	0.0263066	RAC2/CCL21/RIPOR2/CCR7/IL23A/CCL19	6
BP	GO:1901222	regulation of NIK/NF-kappaB signaling	14/1049	110/18800	0.00321226	0.0315964	0.0263066	TNFSF14/PDCD4/LITAF/IL18/SASH1/PPM1B/NOL3/CD27/TSPAN6/ZC3H12A/RASSF2/IL23A/LIME1/CCL19	14
BP	GO:0034501	protein localization to kinetochore	5/1049	19/18800	0.00322993	0.0315964	0.0263066	NDC80/CDT1/KNTC1/TTK/AURKB	5
BP	GO:0043031	negative regulation of macrophage activation	5/1049	19/18800	0.00322993	0.0315964	0.0263066	GRN/ZC3H12A/NR1H3/CST7/SYT11	5
BP	GO:0045091	regulation of single stranded viral RNA replication via double stranded DNA intermediate	5/1049	19/18800	0.00322993	0.0315964	0.0263066	MPHOSPH8/APOBEC3B/TOP2A/APOBEC3F/APOBEC3G	5
BP	GO:0045618	positive regulation of keratinocyte differentiation	5/1049	19/18800	0.00322993	0.0315964	0.0263066	NUMA1/NOTCH1/ETV4/PLAAT4/PRKCH	5
BP	GO:0045953	negative regulation of natural killer cell mediated cytotoxicity	5/1049	19/18800	0.00322993	0.0315964	0.0263066	LILRB1/HLA-E/HLA-G/KIR2DL4/HLA-F	5
BP	GO:0071800	podosome assembly	5/1049	19/18800	0.00322993	0.0315964	0.0263066	MAPK9/GSN/ASAP1/MSN/LCP1	5
BP	GO:1903083	protein localization to condensed chromosome	5/1049	19/18800	0.00322993	0.0315964	0.0263066	NDC80/CDT1/KNTC1/TTK/AURKB	5
BP	GO:2001185	regulation of CD8-positive, alpha-beta T cell activation	5/1049	19/18800	0.00322993	0.0315964	0.0263066	LILRB1/HLA-E/SH3RF1/RUNX3/IRF1	5
BP	GO:0002504	antigen processing and presentation of peptide or polysaccharide antigen via MHC class II	7/1049	36/18800	0.0033173	0.0322909	0.0268849	HLA-DMA/HLA-DPB1/HLA-DOA/HLA-DOB/HLA-DMB/HLA-DQB2/PYCARD	7
BP	GO:0002863	positive regulation of inflammatory response to antigenic stimulus	4/1049	12/18800	0.00332468	0.0322909	0.0268849	LTA/HLA-E/CCR7/C3	4
BP	GO:0032823	regulation of natural killer cell differentiation	4/1049	12/18800	0.00332468	0.0322909	0.0268849	IL15/RASGRP1/PRDM1/ZNF683	4
BP	GO:0060907	positive regulation of macrophage cytokine production	4/1049	12/18800	0.00332468	0.0322909	0.0268849	LILRB1/HLA-G/PLCG2/SPON2	4
BP	GO:1990845	adaptive thermogenesis	18/1049	159/18800	0.00337626	0.0327335	0.0272534	LEP/HNRNPU/IL18/NOTCH1/ADAM17/SLC25A4/SYK/CCR2/PLCL2/IL15/PLAC8/VEGFA/NR1H3/TRPV2/ALPL/IL4R/GHRL/ADRB2	18
BP	GO:1901989	positive regulation of cell cycle phase transition	15/1049	123/18800	0.00353644	0.0342254	0.0284955	CDK10/CDC25B/ADAM17/CDCA5/DLGAP5/CDC25A/CDT1/RRM1/FBXO5/UBE2C/CCNB1/CDC7/STIL/PLCG2/CCND2	15
BP	GO:0010332	response to gamma radiation	9/1049	56/18800	0.00359352	0.0346545	0.0288528	TRIM13/TIGAR/XRCC2/GTF2H5/PRKDC/FANCD2/H2AX/PARP1/CYBA	9
BP	GO:0031529	ruffle organization	9/1049	56/18800	0.00359352	0.0346545	0.0288528	TPM1/INPPL1/PLEKHA1/TCIRG1/CCL21/PLEK/CCR7/CSPG4/EVL	9
BP	GO:0010951	negative regulation of endopeptidase activity	25/1049	251/18800	0.00367011	0.0353305	0.0294155	LXN/TNFSF14/CSTB/USP14/SNCA/PLAUR/CST6/BIRC5/PTTG1/NOL3/CD27/SH3RF1/SERPING1/VEGFA/SERPINF2/SPOCK2/IFI16/CST7/BIRC3/BIN1/PAPLN/C3/RENBP/SPINT1/SERPINB5	25
BP	GO:0051053	negative regulation of DNA metabolic process	17/1049	148/18800	0.00371829	0.0357311	0.0297491	DFFA/HNRNPU/ZNF91/GNL3L/CDAN1/AUNIP/MSH6/GTPBP4/BLM/CDT1/FBXO5/POLQ/PARP1/RMI2/TINF2/NIBAN2/GZMA	17
BP	GO:0007589	body fluid secretion	12/1049	89/18800	0.00382851	0.036606	0.0304775	SLC4A5/CREB1/NCOR2/SLC29A1/NME1/STAT5A/VEGFA/DDR1/CELSR2/NR1H3/CYBA/ADA	12
BP	GO:0070098	chemokine-mediated signaling pathway	12/1049	89/18800	0.00382851	0.036606	0.0304775	CCR2/CXCL13/CCL21/CCL22/CXCR5/CXCR3/CXCL11/CCR7/CXCL9/CXCR6/CCL19/CCL5	12
BP	GO:1904377	positive regulation of protein localization to cell periphery	10/1049	67/18800	0.00382953	0.036606	0.0304775	AKAP5/ACSL3/PGRMC1/NUMA1/ZDHHC8/SPTBN1/CNST/IFNG/RAMP3/PRKCH	10
BP	GO:0002360	T cell lineage commitment	6/1049	28/18800	0.00388631	0.0367426	0.0305913	SPN/STAT3/PRKDC/BATF/IL23A/SLAMF6	6
BP	GO:0010971	positive regulation of G2/M transition of mitotic cell cycle	6/1049	28/18800	0.00388631	0.0367426	0.0305913	CDC25B/CDC25A/RRM1/FBXO5/CCNB1/CDC7	6
BP	GO:0031342	negative regulation of cell killing	6/1049	28/18800	0.00388631	0.0367426	0.0305913	LILRB1/HLA-E/HLA-G/KIR2DL4/IL7R/HLA-F	6
BP	GO:0048873	homeostasis of number of cells within a tissue	6/1049	28/18800	0.00388631	0.0367426	0.0305913	NOTCH1/CCR2/SOX9/SASH3/CORO1A/RAC3	6
BP	GO:0072539	T-helper 17 cell differentiation	6/1049	28/18800	0.00388631	0.0367426	0.0305913	STAT3/NFKBIZ/ZC3H12A/BATF/IL23A/SLAMF6	6
BP	GO:0009119	ribonucleoside metabolic process	7/1049	37/18800	0.00389786	0.0367426	0.0305913	BLOC1S6/APOBEC3B/HPRT1/APOBEC3F/APOBEC3G/ADA2/ADA	7
BP	GO:0045730	respiratory burst	7/1049	37/18800	0.00389786	0.0367426	0.0305913	GRN/CD52/RAC2/JCHAIN/NCF1C/PIK3CD/CYBA	7
BP	GO:0072529	pyrimidine-containing compound catabolic process	7/1049	37/18800	0.00389786	0.0367426	0.0305913	TDG/MBD4/APOBEC3B/UNG/APOBEC3F/APOBEC3G/TYMP	7
BP	GO:0048771	tissue remodeling	19/1049	174/18800	0.00395508	0.0372175	0.0309866	LRP5L/LEP/GPR137B/IL18/CHD7/TCIRG1/SYK/NOL3/CCR2/IL15/ELF3/CD38/INPP5D/TNFAIP3/RASSF2/CSPG4/IL23A/RSPO3/ADRB2	19
BP	GO:0006260	DNA replication	27/1049	280/18800	0.00406618	0.0381968	0.031802	NUCKS1/CHTF18/FAM111A/CDAN1/POLD2/GTPBP4/MCM7/CDC45/BLM/CDT1/CCNA2/RRM1/FEN1/FBXO5/POLQ/NASP/RMI2/E2F7/CHAF1B/CDC7/MCM6/MCM4/MCM2/MCM5/MCM10/JADE2/GINS2	27
BP	GO:0039692	single stranded viral RNA replication via double stranded DNA intermediate	5/1049	20/18800	0.00411123	0.0384209	0.0319886	MPHOSPH8/APOBEC3B/TOP2A/APOBEC3F/APOBEC3G	5
BP	GO:0042454	ribonucleoside catabolic process	5/1049	20/18800	0.00411123	0.0384209	0.0319886	APOBEC3B/APOBEC3F/APOBEC3G/ADA2/ADA	5
BP	GO:0043373	CD4-positive, alpha-beta T cell lineage commitment	5/1049	20/18800	0.00411123	0.0384209	0.0319886	SPN/STAT3/BATF/IL23A/SLAMF6	5
BP	GO:0097028	dendritic cell differentiation	8/1049	47/18800	0.00412565	0.0384896	0.0320458	LILRB1/IRF8/HLA-G/CCR7/TMEM176A/BATF/UBD/CCL19	8
BP	GO:0044270	cellular nitrogen compound catabolic process	39/1049	449/18800	0.00419144	0.0390363	0.032501	DFFA/TDG/MBD4/AGO2/CTIF/EXOSC1/HNRNPU/ELAVL1/SAMD4B/SMPDL3A/MPST/PDE7A/UPF2/TBRG4/ZSWIM8/PNPT1/PHAX/PDE4C/ANG/NUDT5/APOBEC3B/FEN1/UNG/PKP1/HPRT1/DKC1/CIRBP/DNASE1L3/IDO1/APOBEC3F/BTG2/APOBEC3G/TYMP/IKBKE/ZC3H12A/ADA2/ISG20/TENT5C/ADA	39
BP	GO:0043123	positive regulation of I-kappaB kinase/NF-kappaB signaling	20/1049	188/18800	0.00425881	0.039596	0.032967	TRIM13/LGALS1/LITAF/RIPK2/ECT2/SHISA5/FYN/TNFSF10/CCL21/APOL3/IKBKE/TSPAN6/BIRC3/PRKCB/CCR7/PIM2/CD40/UBD/CASP1/CCL19	20
BP	GO:0007266	Rho protein signal transduction	16/1049	138/18800	0.0043799	0.0406524	0.0338465	DLC1/SYNJ2BP/NTN1/STMN1/WAS/APOE/ARHGDIB/P2RY10/RIPOR2/GPR18/RHOD/ADGRG1/ARHGEF3/CDC42SE2/P2RY8/ARHGAP4	16
BP	GO:0010742	macrophage derived foam cell differentiation	7/1049	38/18800	0.00455231	0.041956	0.0349319	MAPK9/ITGAV/IL18/STAT1/PRKCH/NR1H3/CETP	7
BP	GO:0019693	ribose phosphate metabolic process	35/1049	394/18800	0.00456046	0.041956	0.0349319	SULT1A1/ENO3/ACSL3/STAT3/TIGAR/HSD17B12/ADCY3/DCAKD/PDE7A/ACOT1/ACSS1/SNCA/MPC2/ACOT2/FOXK1/PDE4C/ACOT9/UCK2/NUDT5/NME1/PPAT/PARP1/GMPS/CTPS1/HPRT1/IFNG/GIMAP7/LDHA/DDIT4/NUPR1/TPST2/SLC2A6/ENO1/ACSL5/ADA	35
BP	GO:0009994	oocyte differentiation	9/1049	58/18800	0.00457393	0.041956	0.0349319	CDC25B/DMC1/FOXO3/ANG/TDRD1/FBXO5/AURKA/TRIP13/REC8	9
BP	GO:0042492	gamma-delta T cell differentiation	4/1049	13/18800	0.00459208	0.041956	0.0349319	SYK/SOX4/GPR18/LEF1	4
BP	GO:0045820	negative regulation of glycolytic process	4/1049	13/18800	0.00459208	0.041956	0.0349319	STAT3/TIGAR/DDIT4/NUPR1	4
BP	GO:0051132	NK T cell activation	4/1049	13/18800	0.00459208	0.041956	0.0349319	IL18/RASAL3/IL15/IL23A	4
BP	GO:0060670	branching involved in labyrinthine layer morphogenesis	4/1049	13/18800	0.00459208	0.041956	0.0349319	IL10/SPINT1/GRHL2/RSPO3	4
BP	GO:0070486	leukocyte aggregation	4/1049	13/18800	0.00459208	0.041956	0.0349319	RAC2/MSN/ZAP70/SEMA4D	4
BP	GO:0072540	T-helper 17 cell lineage commitment	4/1049	13/18800	0.00459208	0.041956	0.0349319	STAT3/BATF/IL23A/SLAMF6	4
BP	GO:0070664	negative regulation of leukocyte proliferation	12/1049	91/18800	0.00459749	0.041956	0.0349319	SPN/IL10/PLA2G2D/LILRB1/IDO1/TNFRSF13B/HLA-G/INPP5D/TNFAIP3/CTLA4/PTPN6/TNFRSF14	12
BP	GO:0032956	regulation of actin cytoskeleton organization	32/1049	352/18800	0.00463002	0.0421821	0.0351201	TPM1/DLC1/SEMA3E/CDK10/LMOD3/BRK1/GSN/RND3/SPTBN1/TJP1/ARHGEF19/STMN1/BAIAP2L2/ECT2/WAS/RAC2/HCLS1/CCL21/ARHGDIB/GMFG/SERPINF2/FES/RHOD/PLEK/BIN1/CORO1A/CCR7/BAIAP2L1/RAC3/CYFIP2/EVL/PYCARD	32
BP	GO:1903900	regulation of viral life cycle	16/1049	139/18800	0.00470059	0.0427534	0.0355957	ILF3/LGALS1/GSN/FAM111A/PPIE/NOTCH1/MPHOSPH8/APOBEC3B/TOP2A/SRPK1/APOBEC3F/APOBEC3G/CH25H/IFI16/ISG20/CCL5	16
BP	GO:0002200	somatic diversification of immune receptors	11/1049	80/18800	0.00473735	0.0430158	0.0358142	IL10/DCLRE1C/PRKDC/MSH6/EXO1/POLQ/UNG/BCL11B/LEF1/BATF/CD40	11
BP	GO:0002218	activation of innate immune response	9/1049	59/18800	0.00513628	0.0461784	0.0384474	RBM14/PRKDC/SYK/FYN/AIM2/PLCG2/IFI16/PYCARD/PYHIN1	9
BP	GO:0002711	positive regulation of T cell mediated immunity	9/1049	59/18800	0.00513628	0.0461784	0.0384474	IL18/HLA-E/HLA-H/HLA-G/SASH3/HLA-F/CD1E/SLAMF1/IL23A	9
BP	GO:0002886	regulation of myeloid leukocyte mediated immunity	9/1049	59/18800	0.00513628	0.0461784	0.0384474	RAC2/SYK/DNASE1L3/CCR2/HLA-E/FES/C3/IL4R/FGR	9
BP	GO:0045063	T-helper 1 cell differentiation	5/1049	21/18800	0.00515161	0.0461784	0.0384474	SPN/RIPK2/LEF1/IL4R/CCL19	5
BP	GO:1900543	negative regulation of purine nucleotide metabolic process	5/1049	21/18800	0.00515161	0.0461784	0.0384474	STAT3/TIGAR/PARP1/DDIT4/NUPR1	5
BP	GO:1901739	regulation of myoblast fusion	5/1049	21/18800	0.00515161	0.0461784	0.0384474	TNFSF14/CD53/RIPOR2/CXCL9/IL4R	5
BP	GO:2000047	regulation of cell-cell adhesion mediated by cadherin	5/1049	21/18800	0.00515161	0.0461784	0.0384474	NOTCH1/TJP1/VEGFA/SERPINF2/ADAM19	5
BP	GO:0045931	positive regulation of mitotic cell cycle	15/1049	128/18800	0.00515357	0.0461784	0.0384474	CDK10/CDC25B/ADAM17/CDCA5/DLGAP5/CDC25A/CDT1/RRM1/FBXO5/UBE2C/CCNB1/CDC7/STIL/CCND2/EIF4EBP1	15
BP	GO:0002562	somatic diversification of immune receptors via germline recombination within a single locus	10/1049	70/18800	0.00527219	0.0469041	0.0390516	IL10/DCLRE1C/PRKDC/MSH6/EXO1/UNG/BCL11B/LEF1/BATF/CD40	10
BP	GO:0016444	somatic cell DNA recombination	10/1049	70/18800	0.00527219	0.0469041	0.0390516	IL10/DCLRE1C/PRKDC/MSH6/EXO1/UNG/BCL11B/LEF1/BATF/CD40	10
BP	GO:0032722	positive regulation of chemokine production	10/1049	70/18800	0.00527219	0.0469041	0.0390516	RIPK2/IL18/ADAM17/AIRE/SYK/IFNG/MBP/MCOLN2/IL4R/PYCARD	10
BP	GO:0051057	positive regulation of small GTPase mediated signal transduction	10/1049	70/18800	0.00527219	0.0469041	0.0390516	ITGAV/KITLG/NOTCH1/TGM2/P2RY10/RASGRP1/GPR18/ADGRG1/ARHGEF3/P2RY8	10
BP	GO:0060236	regulation of mitotic spindle organization	7/1049	39/18800	0.00528631	0.0469041	0.0390516	HNRNPU/NUMA1/TACC3/CHMP1A/PSRC1/KIF15/TPX2	7
BP	GO:0090077	foam cell differentiation	7/1049	39/18800	0.00528631	0.0469041	0.0390516	MAPK9/ITGAV/IL18/STAT1/PRKCH/NR1H3/CETP	7
BP	GO:1904894	positive regulation of receptor signaling pathway via STAT	8/1049	49/18800	0.00536416	0.0475174	0.0395622	LEP/IL10/OCIAD1/NOTCH1/IL7R/IL10RA/IL23A/CCL5	8
BP	GO:0009259	ribonucleotide metabolic process	34/1049	384/18800	0.00538852	0.0476555	0.0396772	SULT1A1/ENO3/ACSL3/STAT3/TIGAR/HSD17B12/ADCY3/DCAKD/PDE7A/ACOT1/ACSS1/SNCA/MPC2/ACOT2/FOXK1/PDE4C/ACOT9/UCK2/NME1/PPAT/PARP1/GMPS/CTPS1/HPRT1/IFNG/GIMAP7/LDHA/DDIT4/NUPR1/TPST2/SLC2A6/ENO1/ACSL5/ADA	34
BP	GO:0001666	response to hypoxia	27/1049	286/18800	0.00539919	0.0476724	0.0396913	HIPK2/LEP/TIGAR/NOTCH1/ADAM17/SLC29A1/FOXO3/ANG/CCNA2/PLOD1/NOL3/LTA/STC2/NDRG1/VEGFA/CD38/VCAM1/DDIT4/CYBA/SLC2A1/ANGPTL4/SLC2A8/CA9/ENO1/BNIP3/PLOD2/ADA	27
BP	GO:0034502	protein localization to chromosome	12/1049	93/18800	0.00548521	0.0483534	0.0402582	MCM8/GNL3L/CDCA5/NDC80/CENPA/CDT1/KNTC1/TTK/AURKB/DKC1/TINF2/IFFO1	12
BP	GO:0001916	positive regulation of T cell mediated cytotoxicity	6/1049	30/18800	0.00557011	0.0489432	0.0407493	HLA-E/HLA-H/HLA-G/HLA-F/CD1E/IL23A	6
BP	GO:0019886	antigen processing and presentation of exogenous peptide antigen via MHC class II	6/1049	30/18800	0.00557011	0.0489432	0.0407493	HLA-DMA/HLA-DPB1/HLA-DOA/HLA-DOB/HLA-DMB/HLA-DQB2	6
BP	GO:0071695	anatomical structure maturation	24/1049	246/18800	0.00563859	0.049465	0.0411838	LEP/CATSPER2/CDC25B/DMC1/FOXO3/PLXNB1/ANG/TDRD1/KIF14/FBXO5/AURKA/TRIP13/CABYR/REC8/IL15/CCL21/CEBPA/VEGFA/LYL1/KLF2/SEMA4D/C3/RAC3/CCL19	24
BP	GO:0051346	negative regulation of hydrolase activity	33/1049	371/18800	0.00565484	0.0495277	0.0412359	DFFA/LXN/TNFSF14/CSTB/USP14/SNCA/PLAUR/GPSM1/MASTL/CST6/BIRC5/PTTG1/NOL3/CD27/SH3RF1/SERPING1/VEGFA/GZMA/SERPINF2/APOC1/SPOCK2/IFI16/ANGPTL4/CST7/SEMA4D/SH3BP4/BIRC3/BIN1/PAPLN/C3/RENBP/SPINT1/SERPINB5	33
BP	GO:0046700	heterocycle catabolic process	38/1049	443/18800	0.00571551	0.0499786	0.0416113	DFFA/TDG/MBD4/AGO2/CTIF/EXOSC1/HNRNPU/ELAVL1/SAMD4B/SMPDL3A/PDE7A/UPF2/TBRG4/ZSWIM8/PNPT1/PHAX/PDE4C/ANG/NUDT5/APOBEC3B/FEN1/UNG/PKP1/HPRT1/DKC1/CIRBP/DNASE1L3/IDO1/APOBEC3F/BTG2/APOBEC3G/TYMP/IKBKE/ZC3H12A/ADA2/ISG20/TENT5C/ADA	38
CC	GO:0005819	spindle	52/1089	402/19594	1.20116e-08	7.26702e-06	6.25868e-06	HAUS2/HNRNPU/BCCIP/CEP19/FAM161A/MTUS1/NUMA1/SAC3D1/TACC3/EVI5/SHCBP1/CDC25B/NGRN/CHMP1A/AUNIP/DLGAP5/CENPV/KIF20A/IL17RB/PSRC1/KIF11/BIRC5/KIF4A/KIF2C/CDC20/NUSAP1/PRC1/RACGAP1/KIF14/KNTC1/FBXO5/HMMR/KIF23/CCNB1/NEK2/CENPF/CDCA8/SKA1/CDC7/KIFC1/KIF15/AURKA/TTK/KIF20B/CENPE/ASPM/TPX2/CKAP2L/AURKB/ECT2/PTPN7/SEPTIN6	52
CC	GO:0098687	chromosomal region	48/1089	366/19594	2.83588e-08	7.36358e-06	6.34184e-06	HNRNPU/THOC2/H4C8/H2AC8/DMC1/CHMP1A/HNRNPA2B1/CDCA5/CENPW/PRKDC/CENPV/NDC80/BIRC5/CENPM/NCAPG/MCM7/KIF2C/BUB1/BLM/CENPA/CDT1/HJURP/KNTC1/FEN1/H4C3/CENPN/TOP2A/H2AX/PARP1/CCNB1/NEK2/CENPF/CDCA8/SKA1/MCM6/TTK/SMC4/MCM4/CENPE/AURKB/MCM2/OIP5/MCM5/REC8/IKZF1/TINF2/RASSF2/SEPTIN6	48
CC	GO:0045335	phagocytic vesicle	26/1089	138/19594	3.76173e-08	7.36358e-06	6.34184e-06	ATG12/RAB32/ATP6V0E1/GSN/ITGAV/RAB9A/LAMP2/ATP6V0D1/WAS/TCIRG1/RAC2/SYK/HLA-E/RAB8B/HLA-H/HLA-G/TAP2/CYBA/UNC93B1/HLA-F/FLNB/GNLY/CORO1A/SLAMF1/SYT11/TAP1	26
CC	GO:0009897	external side of plasma membrane	55/1089	455/19594	4.86849e-08	7.36358e-06	6.34184e-06	SPN/TNFRSF9/ABCC4/ITGAV/IL11RA/CSF2RA/LILRB1/SLC7A5/IL21R/CCR2/TNFRSF4/CD79B/HLA-E/CD3G/CD27/BTN3A3/CD3D/CD3E/HLA-H/CD48/HLA-G/LAG3/CD69/VCAM1/BTN3A1/MICB/CD8A/IL2RB/CXCR5/IL7R/CD79A/ITGAL/CD2/CXCR3/ITGAX/BTN3A2/IGLL1/CD83/HLA-F/CCR7/CD1E/CXCL9/SLAMF1/CD276/IL4R/CSF3R/CTLA4/CD40/TNFRSF14/CXCR6/CD6/IGKC/SLAMF6/CD19/ADA	55
CC	GO:0000775	chromosome, centromeric region	34/1089	227/19594	1.28681e-07	1.55704e-05	1.34099e-05	HNRNPU/H4C8/H2AC8/CHMP1A/CDCA5/CENPW/CENPV/NDC80/BIRC5/CENPM/NCAPG/KIF2C/BUB1/CENPA/CDT1/HJURP/KNTC1/H4C3/CENPN/TOP2A/CCNB1/NEK2/CENPF/CDCA8/SKA1/TTK/SMC4/CENPE/AURKB/OIP5/REC8/IKZF1/RASSF2/SEPTIN6	34
CC	GO:0042611	MHC protein complex	10/1089	25/19594	4.09888e-07	3.7637e-05	3.24147e-05	HLA-DMA/HLA-E/HLA-DPB1/HLA-H/HLA-G/HLA-DOA/HLA-DOB/HLA-DMB/HLA-F/HLA-DQB2	10
CC	GO:0071162	CMG complex	7/1089	11/19594	4.3547e-07	3.7637e-05	3.24147e-05	MCM7/CDC45/MCM6/MCM4/MCM2/MCM5/GINS2	7
CC	GO:0030670	phagocytic vesicle membrane	17/1089	77/19594	8.40875e-07	6.35912e-05	5.47675e-05	ATG12/RAB32/ATP6V0E1/RAB9A/LAMP2/ATP6V0D1/TCIRG1/RAC2/HLA-E/RAB8B/HLA-H/HLA-G/TAP2/CYBA/HLA-F/CORO1A/TAP1	17
CC	GO:0031261	DNA replication preinitiation complex	7/1089	12/19594	9.94766e-07	6.68704e-05	5.75917e-05	MCM7/CDC45/MCM6/MCM4/MCM2/MCM5/GINS2	7
CC	GO:0000779	condensed chromosome, centromeric region	25/1089	156/19594	1.65455e-06	9.18722e-05	7.91244e-05	HNRNPU/CHMP1A/CENPW/CENPV/NDC80/BIRC5/CENPM/NCAPG/KIF2C/BUB1/CENPA/CDT1/HJURP/KNTC1/CENPN/CCNB1/NEK2/CENPF/SKA1/TTK/CENPE/AURKB/REC8/RASSF2/SEPTIN6	25
CC	GO:0000776	kinetochore	24/1089	146/19594	1.6704e-06	9.18722e-05	7.91244e-05	HNRNPU/CHMP1A/CENPW/CENPV/NDC80/BIRC5/CENPM/KIF2C/BUB1/CENPA/CDT1/HJURP/KNTC1/CENPN/CCNB1/NEK2/CENPF/SKA1/TTK/CENPE/AURKB/REC8/RASSF2/SEPTIN6	24
CC	GO:0051233	spindle midzone	11/1089	36/19594	2.46674e-06	0.000123649	0.000106492	HNRNPU/NUMA1/CENPV/PRC1/RACGAP1/KIF14/CDCA8/AURKA/KIF20B/CENPE/AURKB	11
CC	GO:0072686	mitotic spindle	25/1089	160/19594	2.65692e-06	0.000123649	0.000106492	HAUS2/HNRNPU/BCCIP/FAM161A/NUMA1/TACC3/NGRN/IL17RB/KIF11/NUSAP1/PRC1/RACGAP1/KIF23/SKA1/CDC7/KIFC1/AURKA/KIF20B/CENPE/ASPM/TPX2/CKAP2L/AURKB/ECT2/PTPN7	25
CC	GO:0030666	endocytic vesicle membrane	27/1089	194/19594	1.00692e-05	0.000435135	0.000374757	ATG12/RAB32/ATP6V0E1/RAB9A/LAMP2/TGOLN2/ATP6V0D1/TCIRG1/RAC2/APOE/HLA-E/HLA-DPB1/CD3G/CD3D/RAB8B/HLA-H/HLA-G/IL7R/TAP2/CYBA/HLA-F/CORO1A/SLC2A8/CSF3R/HLA-DQB2/TAP1/ADRB2	27
CC	GO:0030139	endocytic vesicle	39/1089	342/19594	1.69676e-05	0.000684359	0.0005894	ATG12/RAB32/ATP6V0E1/GSN/ITGAV/RAB9A/LAMP2/TGOLN2/OCLN/ATP6V0D1/WAS/TCIRG1/RAC2/SYK/APOE/HLA-E/HLA-DPB1/CD3G/CD3D/RAB8B/HLA-H/HLA-G/RINL/IL7R/TAP2/CYBA/UNC93B1/HLA-F/FLNB/GNLY/CORO1A/SLAMF1/SLC2A8/SYT11/CSF3R/CTLA4/HLA-DQB2/TAP1/ADRB2	39
CC	GO:0030496	midbody	27/1089	203/19594	2.31665e-05	0.000875983	0.000754435	RALB/HNRNPU/SHCBP1/CHMP1A/CENPV/KIF20A/PSRC1/BIRC5/KIF4A/PRC1/RACGAP1/KIF14/KIF23/NEK2/CENPF/CDCA8/AURKA/KIF20B/CENPE/ASPM/ANLN/AURKB/ECT2/CEP55/SLC2A1/CELF2/SEPTIN6	27
CC	GO:0000793	condensed chromosome	31/1089	255/19594	3.59528e-05	0.00124817	0.00107498	HNRNPU/STAG3L2/DMC1/CHMP1A/CENPW/CENPV/NDC80/BIRC5/CENPM/NCAPG/KIF2C/BUB1/BLM/CENPA/CDT1/FANCD2/HJURP/KNTC1/CENPN/TOP2A/H2AX/CCNB1/NEK2/CENPF/SKA1/TTK/CENPE/AURKB/REC8/RASSF2/SEPTIN6	31
CC	GO:0032993	protein-DNA complex	28/1089	220/19594	3.71356e-05	0.00124817	0.00107498	H2BC8/H3C10/H4C8/H2AC8/KAT6A/SUZ12/H2BC12/MPHOSPH8/POLD2/MORF4L2/H2AC6/MRGBP/PRKDC/MCM7/CDC45/CENPA/H4C3/H2AX/PARP1/MCM6/MCM4/MCM2/MCM5/BRF2/TINF2/NUPR1/LEF1/GINS2	28
CC	GO:0005876	spindle microtubule	15/1089	83/19594	4.6808e-05	0.00149046	0.00128365	HAUS2/HNRNPU/FAM161A/NUMA1/CHMP1A/PSRC1/KIF11/BIRC5/KIF4A/PRC1/KNTC1/SKA1/AURKA/CENPE/AURKB	15
CC	GO:0045171	intercellular bridge	14/1089	75/19594	5.74256e-05	0.00170919	0.00147203	NGRN/RBM18/KIF20A/PRC1/CDCA8/CDC7/KIF20B/GSTM2/TPX2/GSTM3/CEP55/PPP1R13L/NUPR1/CYTH4	14
CC	GO:1990023	mitotic spindle midzone	6/1089	14/19594	5.93274e-05	0.00170919	0.00147203	HNRNPU/NUMA1/PRC1/KIF20B/CENPE/AURKB	6
CC	GO:0000922	spindle pole	23/1089	169/19594	6.35994e-05	0.00174898	0.0015063	HNRNPU/BCCIP/CEP19/FAM161A/NUMA1/TACC3/CDC25B/AUNIP/DLGAP5/PSRC1/KIF11/CDC20/PRC1/KNTC1/CCNB1/NEK2/CENPF/AURKA/KIF20B/ASPM/TPX2/CKAP2L/AURKB	23
CC	GO:0001772	immunological synapse	10/1089	44/19594	0.000118439	0.00311546	0.00268317	CD53/LAT/CD3E/GZMB/GZMA/CD37/SKAP1/ZAP70/CORO1A/CD6	10
CC	GO:0042105	alpha-beta T cell receptor complex	5/1089	11/19594	0.000183147	0.00461682	0.00397621	CD3G/CD3D/CD3E/CD247/PTPN6	5
CC	GO:0042613	MHC class II protein complex	6/1089	17/19594	0.000211654	0.00506793	0.00436472	HLA-DMA/HLA-DPB1/HLA-DOA/HLA-DOB/HLA-DMB/HLA-DQB2	6
CC	GO:0030175	filopodium	16/1089	105/19594	0.000217795	0.00506793	0.00436472	WASH3P/INPPL1/ITGAV/KITLG/DMD/FARP1/MSN/CXADR/DEF6/HLA-G/VCAM1/MYO1G/RIPOR2/FAT1/TBC1D10C/LCP1	16
CC	GO:0031252	cell leading edge	41/1089	416/19594	0.000278015	0.00606005	0.00521918	AKAP5/DUSP22/TPM1/WWC1/DLC1/WASH3P/BRK1/GSN/INPPL1/ITGAV/INPP5E/ARHGEF4/PLEKHA1/KITLG/ADAM17/SPTBN1/OCLN/CADM4/GABBR1/NME1/RAC2/SH2D3C/ARHGEF6/SH3RF1/APBB1IP/PLCG2/RINL/MYO1G/RIPOR2/DOCK8/FAT1/PLEK/FGD3/CORO1A/CSPG4/RAC3/LCP1/EVL/RASGRP2/FGR/FGD2	41
CC	GO:0032587	ruffle membrane	15/1089	97/19594	0.000287868	0.00606005	0.00521918	TPM1/WWC1/DLC1/ITGAV/ARHGEF4/PLEKHA1/ADAM17/NME1/SH2D3C/PLCG2/PLEK/LCP1/RASGRP2/FGR/FGD2	15
CC	GO:0031256	leading edge membrane	22/1089	175/19594	0.000290482	0.00606005	0.00521918	AKAP5/TPM1/WWC1/DLC1/ITGAV/ARHGEF4/PLEKHA1/ADAM17/SPTBN1/GABBR1/NME1/SH2D3C/PLCG2/MYO1G/RIPOR2/DOCK8/PLEK/CSPG4/LCP1/RASGRP2/FGR/FGD2	22
CC	GO:0016363	nuclear matrix	16/1089	109/19594	0.000337088	0.00679795	0.00585469	HNRNPU/NSMF/NUMA1/AKAP8L/NCOR2/CHMP1A/HNRNPA2B1/XPOT/MYB/CENPW/KIF4A/BLM/CENPF/SRPK1/TINF2/IFFO1	16
CC	GO:0044194	cytolytic granule	5/1089	13/19594	0.000464626	0.0090677	0.00780951	GZMB/GZMH/NKG7/PRF1/GNLY	5
CC	GO:0005938	cell cortex	32/1089	310/19594	0.000569936	0.0107753	0.0092802	DLC1/GSN/NSMF/NUMA1/RND3/SHROOM4/SNCA/SPTBN1/SPIRE2/GPSM1/DMD/MELK/ANLN/ECT2/RAC2/RASAL3/HCLS1/PLA2G4C/TNFAIP2/CYTIP/RHOD/LAMC2/FNBP1L/SLC2A1/PRKCB/FLNB/FNBP1/CORO1A/RAC3/SEPTIN6/ENO1/SHROOM3	32
CC	GO:0002102	podosome	7/1089	29/19594	0.000852165	0.0147303	0.0126864	GSN/TJP1/ASAP1/LPXN/VCAM1/FERMT3/LCP1	7
CC	GO:0071556	integral component of lumenal side of endoplasmic reticulum membrane	7/1089	29/19594	0.000852165	0.0147303	0.0126864	SPPL2A/HLA-E/HLA-DPB1/HLA-H/HLA-G/HLA-F/HLA-DQB2	7
CC	GO:0098553	lumenal side of endoplasmic reticulum membrane	7/1089	29/19594	0.000852165	0.0147303	0.0126864	SPPL2A/HLA-E/HLA-DPB1/HLA-H/HLA-G/HLA-F/HLA-DQB2	7
CC	GO:0010369	chromocenter	5/1089	15/19594	0.000987572	0.0165967	0.0142938	MBD6/CDCA8/AURKB/OIP5/TINF2	5
CC	GO:0005874	microtubule	40/1089	435/19594	0.00126993	0.0207651	0.0178838	HAUS2/HNRNPU/MAP6D1/HOOK1/FAM161A/MTUS1/NUMA1/CHMP1A/SELENOS/KIF20A/PSRC1/KIF11/BIRC5/KIF4A/KIF2C/NUSAP1/PRC1/RACGAP1/KIF14/KNTC1/STMN1/TTLL4/KIF23/NEK2/SKA1/KIFC1/KIF15/AURKA/KIF20B/CENPE/ASPM/TPX2/AURKB/NDRG1/AKNA/TUBB2A/RASSF5/MAP7/SHROOM3/ARHGAP4	40
CC	GO:0030867	rough endoplasmic reticulum membrane	6/1089	24/19594	0.00164712	0.0262238	0.0225851	UBA1/TMEM97/PLOD1/ZC3H12A/PLOD2/SSR4	6
CC	GO:0034399	nuclear periphery	16/1089	127/19594	0.00181645	0.0281782	0.0242683	HNRNPU/NSMF/NUMA1/AKAP8L/NCOR2/CHMP1A/HNRNPA2B1/XPOT/MYB/CENPW/KIF4A/BLM/CENPF/SRPK1/TINF2/IFFO1	16
CC	GO:0098636	protein complex involved in cell adhesion	8/1089	43/19594	0.00226078	0.0341944	0.0294497	LGALS1/ITGAV/PLAUR/TSPAN32/ITGB7/ITGAL/ITGAX/CTLA4	8
CC	GO:0098576	lumenal side of membrane	7/1089	35/19594	0.00274477	0.0405021	0.0348822	SPPL2A/HLA-E/HLA-DPB1/HLA-H/HLA-G/HLA-F/HLA-DQB2	7
CC	GO:0097431	mitotic spindle pole	7/1089	36/19594	0.0032466	0.0450707	0.0388169	BCCIP/FAM161A/NUMA1/AURKA/KIF20B/ASPM/AURKB	7
CC	GO:1902554	serine/threonine protein kinase complex	13/1089	99/19594	0.00326646	0.0450707	0.0388169	PHKA2/BCCIP/ULK1/GTF2H5/PRKDC/CKS2/CCNA2/CCNB1/CCNB2/CCND2/CCNY/CDK12/PYCARD	13
CC	GO:0000940	outer kinetochore	4/1089	12/19594	0.00327787	0.0450707	0.0388169	NDC80/CCNB1/CENPF/SKA1	4
CC	GO:0044815	DNA packaging complex	21/1089	198/19594	0.00342991	0.0461132	0.0397148	H2BC8/H3C10/H4C8/STAG3L2/H2AC8/KAT6A/H2BC12/MPHOSPH8/MORF4L2/H2AC6/SMARCA4/MRGBP/NDC80/NCAPG/CENPA/H4C3/H2AX/SMC4/REC8/BCL11B/TINF2	21
MF	GO:0140097	catalytic activity, acting on DNA	32/1074	222/18410	2.0126e-06	0.00186568	0.00173719	TDG/MBD4/CHD8/CHTF18/TDP1/MCM8/EXO5/TOP3A/XRCC2/REXO2/DMC1/SMARCA4/DCLRE1C/MSH6/MCM7/CHD7/EXO1/NME1/TTF2/BLM/FEN1/TOP2A/POLQ/HLTF/UNG/MCM6/MCM4/MCM2/DKC1/MCM5/DNASE1L3/ISG20	32
MF	GO:0030695	GTPase regulator activity	53/1074	488/18410	9.57655e-06	0.00282961	0.00263474	ARHGAP33/AGAP6/DLC1/DOCK4/RGS10/TNK2/SGSM2/TBC1D15/DENND4C/ARHGEF4/EVI5/ARHGEF19/GPSM1/PLXNB1/ASAP1/FARP1/RACGAP1/ECT2/DOCK2/WAS/ARHGAP9/SH2D3C/GRTP1/RASAL3/ARHGEF6/ADAP1/ARHGDIB/DEF6/ARHGAP15/DOCK10/RAPGEFL1/ELMO1/RASGRP1/RINL/RGL1/DOCK8/ARHGAP25/SMAP2/RHOD/AGAP1/ARHGAP30/SH3BP4/TBC1D10C/FGD3/SIPA1/DENND2D/ARHGEF3/GPSM3/CYTH4/RASGRP2/ARHGAP4/ACAP1/FGD2	53
MF	GO:0060589	nucleoside-triphosphatase regulator activity	53/1074	488/18410	9.57655e-06	0.00282961	0.00263474	ARHGAP33/AGAP6/DLC1/DOCK4/RGS10/TNK2/SGSM2/TBC1D15/DENND4C/ARHGEF4/EVI5/ARHGEF19/GPSM1/PLXNB1/ASAP1/FARP1/RACGAP1/ECT2/DOCK2/WAS/ARHGAP9/SH2D3C/GRTP1/RASAL3/ARHGEF6/ADAP1/ARHGDIB/DEF6/ARHGAP15/DOCK10/RAPGEFL1/ELMO1/RASGRP1/RINL/RGL1/DOCK8/ARHGAP25/SMAP2/RHOD/AGAP1/ARHGAP30/SH3BP4/TBC1D10C/FGD3/SIPA1/DENND2D/ARHGEF3/GPSM3/CYTH4/RASGRP2/ARHGAP4/ACAP1/FGD2	53
MF	GO:0043028	cysteine-type endopeptidase regulator activity involved in apoptotic process	11/1074	40/18410	1.22098e-05	0.00282961	0.00263474	TNFSF14/SNCA/RPS27L/BIRC5/NOL3/CD27/CTSH/ATP2A3/BIRC3/PYCARD/CASP1	11
MF	GO:0140375	immune receptor activity	23/1074	148/18410	1.56967e-05	0.00291016	0.00270974	IFNAR2/IL11RA/CSF2RA/IL17RD/LILRB1/IL17RB/IL21R/CCR2/CR2/CTSH/HLA-DOA/KIR2DL4/IL2RB/HLA-DOB/CXCR5/IL7R/CXCR3/IL10RA/CCR7/IL4R/CSF3R/CXCR6/HLA-DQB2	23
MF	GO:0008094	ATP-dependent activity, acting on DNA	18/1074	103/18410	2.60398e-05	0.00386022	0.00359437	CHD8/CHTF18/MCM8/XRCC2/DMC1/SMARCA4/MSH6/MCM7/CHD7/TTF2/BLM/TOP2A/POLQ/HLTF/MCM6/MCM4/MCM2/MCM5	18
MF	GO:0017116	single-stranded DNA helicase activity	8/1074	23/18410	2.91495e-05	0.00386022	0.00359437	CHTF18/MCM8/MCM7/POLQ/MCM6/MCM4/MCM2/MCM5	8
MF	GO:0017124	SH3 domain binding	20/1074	125/18410	3.59615e-05	0.00416703	0.00388005	AKAP5/DOCK4/INPPL1/ADAM17/DRD4/PTTG1/PTTG3P/CABYR/WAS/HCLS1/CD3E/ELMO1/INPP5D/CYBA/SKAP1/KHDRBS3/PTPN6/EVL/ADAM19/CRB3	20
MF	GO:0003697	single-stranded DNA binding	19/1074	120/18410	6.47117e-05	0.00666531	0.00620627	HNRNPU/NUCKS1/TDP1/MCM8/FAM111A/TOP3A/DMC1/HNRNPA2B1/MCM7/CDC45/BLM/HROB/MCM6/SMC4/MCM4/MCM2/MCM5/MCM10/JCHAIN	19
MF	GO:0061134	peptidase regulator activity	29/1074	230/18410	7.62887e-05	0.00707196	0.00658492	LXN/TNFSF14/CSTB/USP14/SNCA/RPS27L/CST6/BIRC5/PTTG1/PSME1/NOL3/PSME2/CD27/CTSH/SERPING1/ATP2A3/SERPINF2/SPOCK2/MAL/CST7/BIRC3/BIN1/PAPLN/C3/RENBP/SPINT1/SERPINB5/PYCARD/CASP1	29
MF	GO:0042169	SH2 domain binding	10/1074	41/18410	9.33213e-05	0.00786444	0.00732282	DLC1/INPPL1/SHCBP1/LILRB1/SYK/LAX1/LAT2/SKAP1/SLAMF1/PTPN6	10
MF	GO:0004896	cytokine receptor activity	16/1074	97/18410	0.000146396	0.0113091	0.0105302	IFNAR2/IL11RA/CSF2RA/IL17RD/IL17RB/IL21R/CCR2/IL2RB/CXCR5/IL7R/CXCR3/IL10RA/CCR7/IL4R/CSF3R/CXCR6	16
MF	GO:0023023	MHC protein complex binding	9/1074	36/18410	0.000170174	0.0121347	0.011299	LILRB1/HLA-DMA/TAPBPL/HLA-DPB1/HLA-DOA/CD8A/HLA-DOB/HLA-DMB/HLA-DQB2	9
MF	GO:0004715	non-membrane spanning protein tyrosine kinase activity	10/1074	45/18410	0.000214701	0.0142163	0.0132372	TNK2/RIPK2/MELK/SYK/FYN/FES/ZAP70/MATK/FGR/ITK	10
MF	GO:0005126	cytokine receptor binding	30/1074	272/18410	0.000610704	0.0360078	0.033528	TNFSF14/TNFSF15/KITLG/IL10/IL18/ADAM17/CADM4/IL37/SYK/BAMBI/NOL3/CCR2/IFNG/TNFSF10/IL15/LTA/CXCL13/CCL21/CCL22/STAT1/VEGFA/CD300LF/CXCL11/LTB/CXCL9/IL23A/PXDN/PYCARD/CCL19/CCL5	30
MF	GO:0051020	GTPase binding	32/1074	298/18410	0.000650761	0.0360078	0.033528	DOCK4/ULK1/SGSM2/BRK1/TNPO3/EVI5/DIAPH2/SPTBN1/XPOT/FARP1/BIRC5/KNTC1/EPRS1/CSE1L/ECT2/DOCK2/WAS/DVL3/NDRG1/ARHGDIB/RINL/FNBP1L/SH3BP4/BIN1/FGD3/RASSF5/CYFIP2/LCP1/ENO1/CDC42SE2/BNIP3/FGD2	32
MF	GO:0005096	GTPase activator activity	30/1074	274/18410	0.000689074	0.0360078	0.033528	ARHGAP33/AGAP6/DLC1/DOCK4/RGS10/SGSM2/TBC1D15/EVI5/ARHGEF19/PLXNB1/ASAP1/RACGAP1/ECT2/DOCK2/ARHGAP9/GRTP1/RASAL3/ARHGEF6/ADAP1/ARHGDIB/ARHGAP15/RINL/ARHGAP25/SMAP2/AGAP1/ARHGAP30/TBC1D10C/SIPA1/ARHGAP4/ACAP1	30
MF	GO:0015631	tubulin binding	38/1074	376/18410	0.000699181	0.0360078	0.033528	WASH3P/MAP6D1/HOOK1/FAM161A/VPS41/MTUS1/NUMA1/DIAPH2/SNCA/WASHC1/DLGAP5/KIF20A/PSRC1/KIF11/BIRC5/KIF4A/KIF2C/NUSAP1/PRC1/RACGAP1/KIF14/STMN1/VASH2/TTLL4/KIF23/CENPF/SKA1/KIFC1/KIF15/KIF20B/CENPE/TPX2/FYN/NDRG1/BRSK1/GPAA1/FES/SYT11	38
MF	GO:0016505	peptidase activator activity involved in apoptotic process	6/1074	20/18410	0.000741999	0.0362017	0.0337085	RPS27L/CTSH/ATP2A3/MAL/PYCARD/CASP1	6
MF	GO:0061135	endopeptidase regulator activity	23/1074	194/18410	0.000963104	0.0446399	0.0415655	LXN/TNFSF14/CSTB/USP14/SNCA/CST6/BIRC5/PTTG1/PSME1/NOL3/PSME2/CD27/SERPING1/SERPINF2/SPOCK2/CST7/BIRC3/BIN1/PAPLN/C3/RENBP/SPINT1/SERPINB5	23
MF	GO:0042605	peptide antigen binding	8/1074	37/18410	0.00110754	0.0488901	0.0455231	SLC7A5/HLA-E/HLA-DPB1/HLA-H/HLA-G/TAP2/HLA-F/TAP1	8
MF	GO:0008017	microtubule binding	29/1074	272/18410	0.00127281	0.0496535	0.0462339	MAP6D1/HOOK1/FAM161A/VPS41/MTUS1/NUMA1/DIAPH2/DLGAP5/KIF20A/PSRC1/KIF11/BIRC5/KIF4A/KIF2C/NUSAP1/PRC1/RACGAP1/KIF14/VASH2/KIF23/CENPF/SKA1/KIFC1/KIF15/KIF20B/CENPE/TPX2/NDRG1/FES	29
MF	GO:0042288	MHC class I protein binding	6/1074	22/18410	0.00129198	0.0496535	0.0462339	PILRB/LILRB1/HLA-E/CD8A/TAP2/TAP1	6
MF	GO:0043027	cysteine-type endopeptidase inhibitor activity involved in apoptotic process	6/1074	22/18410	0.00129198	0.0496535	0.0462339	TNFSF14/SNCA/BIRC5/NOL3/CD27/BIRC3	6
MF	GO:0004869	cysteine-type endopeptidase inhibitor activity	10/1074	56/18410	0.00133909	0.0496535	0.0462339	TNFSF14/CSTB/SNCA/CST6/BIRC5/PTTG1/NOL3/CD27/CST7/BIRC3	10

## Sheet: kegg
ID	Description	GeneRatio	BgRatio	pvalue	p.adjust	qvalue	geneID	Count
hsa05340	Primary immunodeficiency	18/448	38/6451	9.28632e-12	2.05228e-09	1.72041e-09	326/64421/7374/23495/915/916/29851/5993/925/3575/6891/973/3543/7535/958/930/100/6890	18
hsa04640	Hematopoietic cell lineage	23/448	99/6451	1.76205e-07	1.94707e-05	1.63222e-05	3590/1438/4254/2812/3108/1380/3115/917/915/916/3111/952/925/3112/951/3575/914/3109/913/3566/1441/924/930	23
hsa05330	Allograft rejection	13/448	38/6451	7.98752e-07	3.96936e-05	3.3275e-05	3586/3108/3458/3133/3115/3002/3135/3111/3112/5551/3109/3134/958	13
hsa04658	Th1 and Th2 cell differentiation	21/448	92/6451	8.32831e-07	3.96936e-05	3.3275e-05	5601/4854/4851/27040/3108/3458/3115/917/864/915/916/6776/3111/6772/3560/3112/7535/3109/3566/919/6775	21
hsa04650	Natural killer cell mediated cytotoxicity	26/448	132/6451	8.98046e-07	3.96936e-05	3.3275e-05	3455/5880/6850/27040/2534/3458/3384/8743/3133/10870/3002/962/3135/5336/7462/3804/4277/5293/3683/5551/7535/5579/5881/4068/919/5777	26
hsa05416	Viral myocarditis	16/448	60/6451	1.93967e-06	7.14444e-05	5.98914e-05	1756/5880/3108/2534/1525/3133/3115/3135/3111/3112/3683/5551/3109/3134/5881/958	16
hsa05169	Epstein-Barr virus infection	33/448	202/6451	2.7098e-06	8.55522e-05	7.1718e-05	3455/5601/6774/9612/6502/890/6850/6773/3108/1380/3133/3115/917/864/915/916/3135/9641/3111/5336/6772/7128/5293/3112/894/6891/3683/3109/3134/919/958/930/6890	33
hsa04612	Antigen processing and presentation	18/448	78/6451	4.32645e-06	0.000119	9.97573e-05	1385/5720/3108/3458/5721/3133/3115/3135/3111/5993/3805/3804/925/3112/6891/3109/3134/6890	18
hsa04060	Cytokine-cytokine receptor interaction	42/448	295/6451	4.84616e-06	0.000119	9.97573e-05	3455/3952/3604/8740/3590/1438/9966/8718/3586/3606/55540/27178/50615/729230/23495/3458/7293/8743/3600/4049/10563/939/608/6366/6367/3560/643/3575/2833/3587/6373/4050/1236/4283/3566/1441/51561/958/8764/10663/6363/6352	42
hsa04659	Th17 cell differentiation	21/448	108/6451	1.25857e-05	0.000262585	0.000220124	5601/6774/196/50615/27040/3108/3458/3115/917/915/916/6776/3111/6772/3560/3112/7535/3109/3566/51561/919	21
hsa04061	Viral protein interaction with cytokine and cytokine receptor	20/448	100/6451	1.30698e-05	0.000262585	0.000220124	8740/3586/3606/27178/729230/8743/4049/10563/6366/6367/3560/643/2833/3587/6373/1236/4283/8764/6363/6352	20
hsa05332	Graft-versus-host disease	12/448	42/6451	1.76248e-05	0.00032459	0.000272102	3108/3458/3133/3115/3002/3135/3111/3804/3112/5551/3109/3134	12
hsa04940	Type I diabetes mellitus	12/448	43/6451	2.29335e-05	0.000389869	0.000326825	3108/3458/4049/3133/3115/3002/3135/3111/3112/5551/3109/3134	12
hsa05320	Autoimmune thyroid disease	13/448	53/6451	4.73364e-05	0.00074724	0.000626407	3586/3108/3133/3115/3002/3135/3111/3112/5551/3109/3134/1493/958	13
hsa04514	Cell adhesion molecules	25/448	157/6451	6.94551e-05	0.00102331	0.000857832	6693/3685/100506658/3108/3384/3133/3115/29851/3135/3111/7412/925/3112/3695/3683/914/3109/3134/3385/5792/80381/1493/958/923/6402	25
hsa04672	Intestinal immune network for IgA production	12/448	49/6451	9.40542e-05	0.00129912	0.00108905	3586/3108/23495/3600/3115/608/29851/3111/3112/3695/3109/958	12
hsa05321	Inflammatory bowel disease	14/448	65/6451	0.000113042	0.00146955	0.00123191	6774/3586/3606/50615/3108/3458/3115/3111/6772/3112/3109/3566/51561/6775	14
hsa04062	Chemokine signaling pathway	28/448	192/6451	0.000127367	0.0014826	0.00124286	6774/109/2309/1794/7454/5880/6773/729230/10563/6366/6367/5336/6772/9844/5293/643/2833/6373/5579/1236/4283/5881/10663/10235/2268/6363/3702/6352	28
hsa05166	Human T-cell leukemia virus 1 infection	31/448	222/6451	0.000127463	0.0014826	0.00124286	706/1385/5601/109/4214/2648/291/991/9232/890/9133/3108/3600/4049/3133/3115/917/915/916/6776/3135/3111/3560/5293/3112/894/3683/6513/3109/3134/958	31
hsa04662	B cell receptor signaling pathway	16/448	84/6451	0.000175161	0.00193553	0.00162254	3636/27071/10859/5880/6850/974/1380/5336/3635/5293/973/55024/5579/5881/5777/930	16
hsa05323	Rheumatoid arthritis	17/448	93/6451	0.00018713	0.00196932	0.00165087	8992/3606/9114/10312/3108/3458/3600/3115/3111/7422/3112/3683/3109/4050/51561/1493/6352	17
hsa04110	Cell cycle	20/448	127/6451	0.000424797	0.00426728	0.00357724	994/5591/4176/991/9232/6502/699/8318/993/9088/890/891/8317/9133/4175/7272/4173/4171/4174/894	20
hsa04660	T cell receptor signaling pathway	17/448	104/6451	0.00073231	0.00703654	0.0058987	5601/3586/27040/2534/3458/917/915/916/29851/10125/925/5293/7535/919/1493/5777/3702	17
hsa04217	Necroptosis	22/448	159/6451	0.00135965	0.0125201	0.0104956	3455/5601/6774/8681/3012/5119/291/8334/3014/142/6773/3458/8743/6776/8605/6772/7128/197259/330/29108/834/6775	22
hsa04630	JAK-STAT signaling pathway	22/448	166/6451	0.00238155	0.0210529	0.0176486	3455/3952/6774/3590/1438/3586/50615/6773/3458/3600/6776/6772/3560/5293/894/3575/3587/3566/1441/51561/5777/6775	22
hsa05162	Measles	19/448	139/6451	0.0032536	0.0276556	0.0231835	3455/5601/6774/4179/9367/440275/6773/4478/917/915/916/6776/9641/6772/3560/7128/5293/894/6504	19
hsa04145	Phagosome	20/448	152/6451	0.00401572	0.0328694	0.0275542	8992/3685/3920/2204/9114/10312/3108/3133/3115/3135/3111/7280/3112/6891/1535/3109/3134/11151/718/6890	20
hsa05310	Asthma	7/448	31/6451	0.00453054	0.0355632	0.0298124	3586/3108/3115/3111/3112/3109/958	7
hsa04621	NOD-like receptor signaling pathway	23/448	186/6451	0.00466666	0.0355632	0.0298124	3455/9140/5601/8767/3606/6773/79792/10628/9447/115362/2634/115361/9641/6772/7128/3428/1535/51393/330/63940/29108/834/6352	23
hsa04064	NF-kappa B signaling pathway	15/448	104/6451	0.00514399	0.0378941	0.0317664	8740/142/6850/27040/4049/6366/5336/7412/7128/7535/330/5579/4050/958/6363	15
hsa05322	Systemic lupus erythematosus	18/448	136/6451	0.00582012	0.0414918	0.0347824	8339/8357/8365/3012/3586/85236/8334/8364/3014/3108/3458/3115/3111/3112/3109/730/718/958	18
hsa05140	Leishmaniasis	12/448	77/6451	0.00636095	0.0424211	0.0355614	3586/3108/3458/3115/3111/6772/3112/1535/3109/5579/718/5777	12
hsa05152	Tuberculosis	22/448	180/6451	0.00642311	0.0424211	0.0355614	1385/5601/3920/3586/8767/3606/9114/10312/6850/3108/3458/3115/3111/6772/5993/3112/3587/3687/3109/11151/718/51561	22
hsa04664	Fc epsilon RI signaling pathway	11/448	68/6451	0.0066514	0.0424211	0.0355614	5601/8681/5880/6850/27040/2534/8605/5336/3635/5293/5881	11
hsa04666	Fc gamma R-mediated phagocytosis	14/448	97/6451	0.00671828	0.0424211	0.0355614	8681/2934/3636/50807/7454/5880/6850/27040/8605/5336/3635/5293/5579/274	14
hsa05235	PD-L1 expression and PD-1 checkpoint pathway in cancer	13/448	89/6451	0.00800554	0.0491451	0.0411981	6774/27040/3458/917/915/916/6772/10125/5293/7535/10538/919/5777	13
